# Supplementary material for: The genome sequence of the ethanologenic bacterium Zymomonas mobilis ZM4
Source: PubMed Central journal article supplement — Nat Biotechnol. 2005 Jan 1;23(1):63–8. doi: 10.1038/nbt1045 (PMC6870993; doi:10.1038/nbt1045), 2005-01-01
Supplement: 41587_2005_BFnbt1045_MOESM1_ESM.pdf [file 41587_2005_BFnbt1045_MOESM1_ESM.pdf]

| ORF     | ORF start | ORF end | ORF fr | Length | ACCESSION  | Gene Product                          | Score | E-Value   | COG No. | Func. Cat. |
|---------|-----------|---------|--------|--------|------------|---------------------------------------|-------|-----------|---------|------------|
| ZMO0001 | 147       | 2516    | 3      | 2370   | NP_792808  | TonB-dependent sideophore rec         | 407   | 1.00E-112 | COG1629 | P          |
| ZMO0002 | 2538      | 3653    | 3      | 1116   | ZP_0005890 | histidinol-phosphate/aromatic ar      | 133   | 5.00E-30  | COG0079 | E          |
| ZMO0003 | 4326      | 3700    | -1     | 627    | NP_457322  | adenosine 5-phosphosulfate kin        | 310   | 1.00E-83  | COG0529 | P          |
| ZMO0004 | 5767      | 4343    | -2     | 1425   | AAG42464   | ATP sulfurylase N subunit             | 751   | 0         | COG2895 | P          |
| ZMO0005 | 6686      | 5784    | -3     | 903    | AAG42465   | ATP sulfurylase D subunit             | 573   | 1.00E-162 | COG0175 | EH         |
| ZMO0006 | 8112      | 6703    | -1     | 1410   | NP_406830  | siroheme synthase                     | 588   | 1.00E-166 | COG0007 | H          |
| ZMO0007 | 9117      | 8389    | -1     | 729    | NP_461867  | 3'-phosphoadenosine 5'-phosph         | 390   | 1.00E-107 | COG0175 | EH         |
| ZMO0008 | 10840     | 9134    | -2     | 1707   | NP_406833  | sulfite reductase [NADPH] hemo        | 884   | 0         | COG0155 | P          |
| ZMO0009 | 12660     | 10846   | -1     | 1815   | P38038     | CYS, sulfite reductase [NADPH] flavop | 804   | 0         | COG0369 | P          |
| ZMO0010 | 13006     | 13716   | 1      | 711    | NP_634315  | zinc metalloprotease                  | 182   | 6.00E-45  | COG1451 | R          |
| ZMO0011 | 14470     | 13760   | -2     | 711    | NP_296224  | conserved hypothetical protein        | 100   | 2.00E-20  | -       | -          |
| ZMO0012 | 15726     | 14551   | -1     | 1176   | ZP_0009491 | coproporphyrinogen III oxidase a      | 468   | 1.00E-131 | COG0635 | H          |
| ZMO0013 | 16362     | 15739   | -1     | 624    | ZP_0005559 | xanthosine triphosphate pyropho       | 237   | 1.00E-61  | COG0127 | F          |
| ZMO0014 | 17077     | 16370   | -2     | 708    | ZP_0009491 | RNase PH                              | 362   | 5.00E-99  | COG0689 | J          |
| ZMO0015 | 17333     | 18370   | 2      | 1038   | ZP_0009491 | transcriptional regulator of heat s   | 357   | 2.00E-97  | COG1420 | K          |
| ZMO0016 | 18367     | 18939   | 1      | 573    | ZP_0009491 | heat shock protein, molecular ch      | 178   | 6.00E-44  | COG0576 | O          |
| ZMO0017 | 18995     | 20401   | 2      | 1407   | ZP_0009451 | tRNA and rRNA cytosine-C5-met         | 395   | 1.00E-108 | COG0144 | J          |
| ZMO0018 | 20553     | 21215   | 3      | 663    | ZP_0009603 | pentose-5-phosphate-3-epimera         | 315   | 4.00E-85  | COG0036 | G          |
| ZMO0019 | 21212     | 22978   | 2      | 1767   | ZP_0009603 | conserved hypothetical protein        | 373   | 1.00E-102 | COG5360 | S          |
| ZMO0020 | 23827     | 23207   | -2     | 621    | ZP_0003468 | conserved hypothetical protein        | 153   | 2.00E-36  | COG1556 | S          |
| ZMO0021 | 25236     | 23800   | -1     | 1437   | ZP_0003468 | electron transport protein ykgF, p    | 606   | 1.00E-172 | COG1139 | C          |
| ZMO0022 | 25979     | 25242   | -3     | 738    | ZP_0003468 | Fe-S oxidoreductase, putative gl      | 347   | 1.00E-94  | COG0247 | C          |
| ZMO0023 | 26826     | 26356   | -1     | 471    | NP_108143  | transcriptional regulator             | 156   | 1.00E-37  | COG1522 | K          |
| ZMO0024 | 26925     | 27104   | 3      | 180    | NP_641244  | integral membrane protein             | 58.9  | 2.00E-08  | COG0697 | GER        |
| ZMO0025 | 27151     | 27855   | 1      | 705    | NP_532127  | conserved hypothetical protein        | 241   | 1.00E-62  | COG0697 | GER        |
| ZMO0026 | 28030     | 28977   | 1      | 948    | ZP_0004325 | FOG: TPR repeat, SEL1 subfam          | 227   | 3.00E-58  | COG0790 | R          |
| ZMO0027 | 29294     | 30898   | 2      | 1605   | NP_945384  | bifunctional purine biosynthesis p    | 648   | 0         | COG0138 | F          |
| ZMO0028 | 31084     | 32007   | 1      | 924    | NP_490238  | mrr restriction system protein        | 275   | 8.00E-73  | COG1715 | V          |
| ZMO0029 | 33932     | 32040   | -3     | 1893   | ZP_0004325 | FOG: TPR repeat, SEL1 subfam          | 316   | 9.00E-85  | COG0790 | R          |
| ZMO0030 | 34225     | 34632   | 1      | 408    | ZP_000255  | lactoylglutathione lyase and relat    | 133   | 7.00E-31  | COG0346 | E          |
| ZMO0031 | 37053     | 34639   | -1     | 2415   | ZP_0009617 | outer membrane receptor protein       | 241   | 6.00E-62  | COG1629 | P          |
| ZMO0032 | 37273     | 37392   | 1      | 120    |            | hypothetical protein                  |       |           |         |            |
| ZMO0033 | 37835     | 37407   | -3     | 429    | ZP_0009641 | conserved hypothetical protein        | 201   | 2.00E-51  | COG2983 | S          |
| ZMO0034 | 37994     | 37842   | -3     | 153    |            | hypothetical protein                  |       |           |         |            |
| ZMO0035 | 38018     | 38620   | 2      | 603    | ZP_0009641 | FOG: Ankyrin repeat                   | 123   | 2.00E-27  | COG0666 | R          |
| ZMO0036 | 38959     | 38627   | -2     | 333    | ZP_0001412 | conserved hypothetical protein        | 73.2  | 1.00E-12  | COG5447 | S          |
| ZMO0037 | 39420     | 38965   | -1     | 456    | ZP_0001311 | PTS system, mannitol/fructose-s       | 139   | 2.00E-32  | COG1762 | GT         |
| ZMO0038 | 40223     | 39627   | -3     | 597    | ZP_0009602 | ribosome-associated protein Y (F      | 199   | 3.00E-50  | COG1544 | J          |
| ZMO0039 | 41040     | 40342   | -1     | 699    | ZP_0009602 | DNA polymerase III, epsilon sub       | 293   | 3.00E-78  | COG0847 | L          |
| ZMO0040 | 41641     | 41054   | -2     | 588    | ZP_0009602 | dephospho-CoA kinase                  | 174   | 1.00E-42  | COG0237 | H          |
| ZMO0041 | 42436     | 41660   | -2     | 777    | ZP_0009602 | shikimate 5-dehydrogenase             | 202   | 7.00E-51  | COG0169 | E          |
| ZMO0042 | 42449     | 42568   | 2      | 120    |            | hypothetical protein                  |       |           |         |            |
| ZMO0043 | 43128     | 42538   | -1     | 591    | ZP_0005453 | nucleotide-binding protein implic     | 167   | 8.00E-41  | COG0424 | D          |
| ZMO0044 | 43595     | 45352   | 2      | 1758   | ZP_0004325 | FOG: TPR repeat, SEL1 subfam          | 289   | 1.00E-76  | COG0790 | R          |
| ZMO0045 | 45537     | 45394   | -1     | 144    |            | hypothetical protein                  |       |           |         |            |
| ZMO0046 | 45925     | 46092   | 1      | 168    |            | hypothetical protein                  |       |           |         |            |
| ZMO0047 | 45833     | 45402   | -3     | 432    | NP_250996  | conserved hypothetical protein, t     | 114   | 4.00E-25  | COG1280 | E          |
| ZMO0048 | 46104     | 45934   | -1     | 171    |            | hypothetical protein                  |       |           |         |            |
| ZMO0049 | 45956     | 46150   | 2      | 195    |            | hypothetical protein                  |       |           |         |            |
| ZMO0050 | 46172     | 47083   | 2      | 912    | NP_947114  | transcriptional regulator, LysR fa    | 267   | 2.00E-70  | COG0583 | K          |
| ZMO0051 | 47080     | 47202   | 1      | 123    |            | hypothetical protein                  |       |           |         |            |
| ZMO0052 | 48423     | 47278   | -1     | 1146   | ZP_0008551 | cyanate permease (MFS)                | 308   | 2.00E-82  | COG2807 | P          |
| ZMO0053 | 49226     | 48426   | -3     | 801    | NP_230173  | beta-ketoacid enol-lactone hy         | 95.9  | 7.00E-19  | COG0596 | R          |
| ZMO0054 | 49349     | 49858   | 2      | 510    | NP_798142  | transcriptional regulator, MarR fa    | 149   | 2.00E-35  | COG1846 | K          |
| ZMO0055 | 50783     | 49998   | -3     | 786    | ZP_0003132 | permeases, predicted                  | 306   | 2.00E-82  | COG0730 | R          |
| ZMO0056 | 52790     | 50973   | -3     | 1818   | ZP_0009382 | glucosamine 6-phosphate synthe        | 924   | 0         | COG0449 | M          |
| ZMO0057 | 53436     | 52882   | -1     | 555    | AAS11297   | conserved hypothetical protein, p     | 107   | 1.00E-22  | -       | -          |
| ZMO0058 | 53444     | 53647   | 2      | 204    |            | hypothetical protein                  |       |           |         |            |
| ZMO0059 | 53616     | 54764   | 3      | 1149   | ZP_0006974 | glycerate kinase                      | 450   | 1.00E-125 | COG1929 | G          |
| ZMO0060 | 55111     | 54815   | -2     | 297    |            | hypothetical protein                  |       |           |         |            |
| ZMO0061 | 56422     | 55127   | -2     | 1296   | CAE01322   | phytase                               | 375   | 1.00E-103 | -       | -          |
| ZMO0062 | 57527     | 56565   | -3     | 963    | NP_104615  | conserved hypothetical protein, s     | 363   | 2.00E-99  | COG0667 | C          |
| ZMO0063 | 57575     | 57706   | 2      | 132    |            | hypothetical protein                  |       |           |         |            |
| ZMO0064 | 59452     | 57800   | -2     | 1653   | ZP_0003410 | carbohydrate-selective porin          | 375   | 1.00E-102 | COG3659 | M          |
| ZMO0065 | 59429     | 59530   | 2      | 102    |            | hypothetical protein                  |       |           |         |            |
| ZMO0066 | 59628     | 59897   | 3      | 270    |            | hypothetical protein                  |       |           |         |            |
| ZMO0067 | 59966     | 60067   | 2      | 102    |            | hypothetical protein                  |       |           |         |            |
| ZMO0068 | 60238     | 61365   | 1      | 1128   | ZP_0004325 | FOG: TPR repeat, SEL1 subfam          | 266   | 7.00E-70  | COG0790 | R          |
| ZMO0069 | 61631     | 62068   | 2      | 438    |            | hypothetical protein                  |       |           |         |            |
| ZMO0070 | 62194     | 62865   | 1      | 672    | NP_455658  | glutaredoxin 2                        | 211   | 7.00E-54  | COG2999 | O          |
| ZMO0071 | 63051     | 62920   | -1     | 132    |            | hypothetical protein                  |       |           |         |            |
| ZMO0072 | 64484     | 63129   | -3     | 1356   | ZP_0009234 | glucose/sorbose dehydrogena           | 346   | 5.00E-94  | COG2133 | G          |
| ZMO0073 | 65377     | 64499   | -2     | 879    | ZP_0009591 | hemolysins and related proteins       | 317   | 2.00E-85  | COG1253 | R          |
| ZMO0074 | 65962     | 65438   | -2     | 525    | ZP_0009591 | predicted metal-dependent hydr        | 154   | 1.00E-36  | COG0319 | R          |
| ZMO0075 | 67028     | 65955   | -3     | 1074   | ZP_0009591 | phosphate starvation-inducible p      | 450   | 1.00E-125 | COG1702 | T          |

|         |        |        |    |      |                                                      |      |           |         |   |      |
|---------|--------|--------|----|------|------------------------------------------------------|------|-----------|---------|---|------|
| ZMO0076 | 67143  | 67012  | -1 | 132  | hypothetical protein                                 |      |           |         | - | -    |
| ZMO0077 | 68486  | 67155  | -3 | 1332 | ZP_00095912: 2-methylthioadenine synthetase          | 584  | 1.00E-165 | COG0621 |   | J    |
| ZMO0078 | 69093  | 68590  | -1 | 504  | NP_419253 chemotaxis protein CheW                    | 150  | 1.00E-35  | COG0835 |   | NT   |
| ZMO0079 | 69629  | 69270  | -3 | 360  | NP_419251 chemotaxis protein CheYI                   | 154  | 3.00E-37  | COG0784 |   | T    |
| ZMO0080 | 70310  | 69780  | -3 | 531  | NP_419257 chemotaxis protein CheD                    | 149  | 3.00E-35  | COG1871 |   | NT   |
| ZMO0081 | 71405  | 70353  | -3 | 1053 | O85128 CHE chemotaxis response regulator p           | 368  | 1.00E-101 | COG2201 |   | NT   |
| ZMO0082 | 72274  | 71408  | -2 | 867  | NP_531220 chemotaxis methyltransferase Cl            | 235  | 7.00E-61  | COG1352 |   | NT   |
| ZMO0083 | 74601  | 72277  | -1 | 2325 | NP_419252 chemotaxis protein CheA                    | 624  | 1.00E-177 | COG0643 |   | NT   |
| ZMO0084 | 74881  | 74618  | -2 | 264  | hypothetical protein                                 |      |           |         |   | -    |
| ZMO0085 | 76368  | 75061  | -1 | 1308 | NP_421939 chemotaxis methyl-accepting prc            | 285  | 1.00E-75  | COG0840 |   | NT   |
| ZMO0086 | 78966  | 76807  | -1 | 2160 | ZP_00095961: guanosine polyphosphate pyropt          | 877  | 0         | COG0317 |   | TK   |
| ZMO0087 | 79591  | 79115  | -2 | 477  | hypothetical protein                                 |      |           |         |   | -    |
| ZMO0088 | 80421  | 79723  | -1 | 699  | hypothetical protein                                 |      |           |         |   | -    |
| ZMO0089 | 81322  | 80636  | -2 | 687  | hypothetical protein                                 |      |           |         |   | -    |
| ZMO0090 | 82556  | 81765  | -3 | 792  | ZP_0002294: dehydrogenases with different sp         | 343  | 2.00E-93  | COG1028 |   | IQR  |
| ZMO0091 | 82626  | 82781  | 3  | 156  | hypothetical protein                                 |      |           |         |   | -    |
| ZMO0092 | 82882  | 83646  | 1  | 765  | hypothetical protein                                 |      |           |         |   | -    |
| ZMO0093 | 83741  | 83941  | 2  | 201  | hypothetical protein                                 |      |           |         |   | -    |
| ZMO0094 | 83922  | 84869  | 3  | 948  | NP_897026 biotin synthase                            | 378  | 1.00E-104 | COG0502 |   | H    |
| ZMO0095 | 85170  | 84955  | -1 | 216  | hypothetical protein                                 |      |           |         |   | -    |
| ZMO0096 | 86167  | 85622  | -2 | 546  | ZP_0005647: phosphatidylglycerophosphate s           | 177  | 1.00E-43  | COG0558 |   | I    |
| ZMO0097 | 86169  | 86315  | 3  | 147  | hypothetical protein                                 |      |           |         |   | -    |
| ZMO0098 | 86443  | 86649  | 1  | 207  | hypothetical protein                                 |      |           |         |   | -    |
| ZMO0099 | 86672  | 87940  | 2  | 1269 | ZP_0005487: 1-acyl-sn-glycerol-3-phosphate a         | 288  | 2.00E-76  | COG0477 |   | GEPR |
| ZMO0100 | 88382  | 88008  | -3 | 375  | NP_420643 conserved hypothetical protein             | 78.6 | 2.00E-14  | COG1733 |   | K    |
| ZMO0101 | 88492  | 89556  | 1  | 1065 | ZP_0012689: nucleoside-diphosphate-sugar e           | 392  | 1.00E-108 |         |   | -    |
| ZMO0102 | 89568  | 89774  | 3  | 207  | hypothetical protein                                 |      |           |         |   | -    |
| ZMO0103 | 90130  | 91548  | 1  | 1419 | NP_420514 conserved hypothetical protein, t          | 316  | 9.00E-85  | COG1680 |   | V    |
| ZMO0104 | 91568  | 91681  | 2  | 114  | hypothetical protein                                 |      |           |         |   | -    |
| ZMO0105 | 91653  | 93107  | 3  | 1455 | ZP_0009483: 3-isopropylmalate dehydratase l          | 748  | 0         | COG0065 |   | E    |
| ZMO0106 | 93104  | 93682  | 2  | 579  | ZP_0009483: 3-isopropylmalate dehydratase s          | 263  | 1.00E-69  | COG0066 |   | E    |
| ZMO0107 | 94553  | 93750  | -3 | 804  | NP_840874 conserved hypothetical protein             | 120  | 2.00E-26  |         |   | -    |
| ZMO0108 | 94937  | 94617  | -3 | 321  | ZP_0001356: membrane transporters of cation          | 87   | 7.00E-17  | COG2076 |   | P    |
| ZMO0109 | 95278  | 96717  | 1  | 1440 | hypothetical protein                                 |      |           |         |   | -    |
| ZMO0110 | 96714  | 97703  | 3  | 990  | NP_484086 conserved hypothetical protein             | 306  | 5.00E-82  | COG0463 |   | M    |
| ZMO0111 | 99643  | 97853  | -2 | 1791 | ZP_0009492: ATPase components of ABC trar            | 789  | 0         | COG0488 |   | R    |
| ZMO0112 | 99833  | 100192 | 2  | 360  | ZP_0009492: conserved hypothetical protein           | 67.4 | 5.00E-11  |         |   | -    |
| ZMO0113 | 100982 | 102388 | 2  | 1407 | NP_768732 para-aminobenzoate synthase $\alpha$       | 427  | 1.00E-118 | COG0147 |   | EH   |
| ZMO0114 | 102405 | 103016 | 3  | 612  | NP_953428 anthranilate synthase componen             | 218  | 5.00E-56  | COG0512 |   | EH   |
| ZMO0115 | 102961 | 103818 | 1  | 858  | ZP_0005021: branched-chain amino acid amin           | 205  | 7.00E-52  | COG0115 |   | EH   |
| ZMO0116 | 104018 | 104455 | 2  | 438  | NP_638113 conserved hypothetical protein             | 80.1 | 1.00E-14  | COG1959 |   | K    |
| ZMO0117 | 104522 | 106159 | 2  | 1638 | ZP_0001378: 6Fe-6S prismane cluster-contain          | 560  | 1.00E-158 | COG1151 |   | C    |
| ZMO0118 | 106299 | 106436 | 3  | 138  | hypothetical protein                                 |      |           |         |   | -    |
| ZMO0119 | 106417 | 107484 | 1  | 1068 | NP_419269 Na <sup>+</sup> /H <sup>+</sup> antiporter | 296  | 3.00E-79  | COG3004 |   | P    |
| ZMO0120 | 107594 | 108712 | 2  | 1119 | NP_696430 conserved hypothetical protein w           | 343  | 3.00E-93  | COG0167 |   | F    |
| ZMO0121 | 108980 | 110329 | 2  | 1350 | ZP_0009597: ATPase related to the helicase s         | 572  | 1.00E-162 | COG2256 |   | L    |
| ZMO0122 | 110510 | 110851 | 2  | 342  | hypothetical protein                                 |      |           |         |   | -    |
| ZMO0123 | 110972 | 111115 | 2  | 144  | hypothetical protein                                 |      |           |         |   | -    |
| ZMO0124 | 112698 | 111121 | -1 | 1578 | ZP_0009620: ATPase, predicted                        | 542  | 1.00E-153 | COG0433 |   | R    |
| ZMO0125 | 113184 | 112717 | -1 | 468  | NP_384411 conserved hypothetical protein             | 192  | 1.00E-48  | COG2606 |   | S    |
| ZMO0126 | 114284 | 114433 | 2  | 150  | hypothetical protein                                 |      |           |         |   | -    |
| ZMO0127 | 115550 | 114597 | -3 | 954  | NP_712431 nuclease S1                                | 116  | 7.00E-25  |         |   | -    |
| ZMO0128 | 117958 | 115574 | -2 | 2385 | NP_902858 TonB-dependent receptor, proba             | 352  | 1.00E-95  | COG1629 |   | P    |
| ZMO0129 | 117948 | 118127 | 3  | 180  | hypothetical protein                                 |      |           |         |   | -    |
| ZMO0130 | 119177 | 118389 | -3 | 789  | P14924 PPA acid phosphatase precursor                | 536  | 1.00E-151 | COG0671 |   | I    |
| ZMO0131 | 120360 | 119341 | -1 | 1020 | NP_809361 conserved hypothetical protein             | 86.3 | 9.00E-16  | COG1409 |   | R    |
| ZMO0132 | 120850 | 121608 | 1  | 759  | ZP_0004325: FOG: TPR repeat, SEL1 subfam             | 162  | 6.00E-39  | COG0790 |   | R    |
| ZMO0133 | 121929 | 122669 | 3  | 741  | ZP_0004325: FOG: TPR repeat, SEL1 subfam             | 228  | 1.00E-58  | COG0790 |   | R    |
| ZMO0134 | 122852 | 123352 | 2  | 501  | ZP_0004325: FOG: TPR repeat, SEL1 subfam             | 122  | 2.00E-27  | COG0790 |   | R    |
| ZMO0135 | 123511 | 124161 | 1  | 651  | ZP_0004325: FOG: TPR repeat, SEL1 subfam             | 182  | 4.00E-45  | COG0790 |   | R    |
| ZMO0136 | 124255 | 124971 | 1  | 717  | ZP_0004325: FOG: TPR repeat, SEL1 subfam             | 157  | 2.00E-37  | COG0790 |   | R    |
| ZMO0137 | 125171 | 126427 | 2  | 1257 | ZP_0004325: FOG: TPR repeat, SEL1 subfam             | 157  | 1.00E-93  | COG0790 |   | R    |
| ZMO0138 | 126496 | 126618 | 1  | 123  | hypothetical protein                                 |      |           |         |   | -    |
| ZMO0139 | 127415 | 126528 | -3 | 888  | ZP_0004965: fructosamine-3-kinase                    | 164  | 3.00E-39  | COG3001 |   | G    |
| ZMO0140 | 127960 | 127487 | -2 | 474  | ZP_0000556: protein-tyrosine-phosphatase             | 180  | 1.00E-44  | COG0394 |   | T    |
| ZMO0141 | 128159 | 128305 | 2  | 147  | hypothetical protein                                 |      |           |         |   | -    |
| ZMO0142 | 128320 | 129000 | 1  | 681  | ZP_0009653: predicted enzyme with a TIM-bar          | 262  | 3.00E-69  | COG0325 |   | R    |
| ZMO0143 | 129000 | 129977 | 3  | 978  | ZP_0001305: ABC-type multidrug transport sy          | 362  | 4.00E-99  | COG1131 |   | V    |
| ZMO0144 | 130042 | 131634 | 1  | 1593 | ZP_0009656: aspartate oxidase                        | 687  | 0         | COG0029 |   | H    |
| ZMO0145 | 131657 | 133330 | 2  | 1674 | NP_639261 peptidase                                  | 481  | 1.00E-134 | COG2234 |   | R    |
| ZMO0146 | 133455 | 133273 | -1 | 183  | hypothetical protein                                 |      |           |         |   | -    |
| ZMO0147 | 133858 | 133754 | -2 | 105  | hypothetical protein                                 |      |           |         |   | -    |
| ZMO0148 | 134798 | 133998 | -3 | 801  | hypothetical protein                                 |      |           |         |   | -    |
| ZMO0149 | 135678 | 134989 | -1 | 690  | ZP_0009683: S-adenosylmethionine-depender            | 282  | 3.00E-75  | COG0220 |   | R    |
| ZMO0150 | 136384 | 135764 | -2 | 621  | ZP_0000810: conserved hypothetical protein           | 116  | 3.00E-25  | COG0454 |   | KR   |
| ZMO0151 | 136673 | 136395 | -3 | 279  | hypothetical protein                                 |      |           |         |   | -    |
| ZMO0152 | 138078 | 136657 | -1 | 1422 | NP_773778 pyruvate kinase                            | 473  | 1.00E-132 | COG0469 |   | G    |

|         |        |        |    |      |            |                                     |      |           |         |     |
|---------|--------|--------|----|------|------------|-------------------------------------|------|-----------|---------|-----|
| ZMO0153 | 139093 | 139842 | 1  | 750  | NP_539238  | glucose-1-phosphate adenylyl tr     | 317  | 1.00E-85  | COG0217 | S   |
| ZMO0154 | 139877 | 140380 | 2  | 504  | ZP_0009654 | Holliday junction resolvosome, e    | 186  | 2.00E-46  | COG0817 | L   |
| ZMO0155 | 140422 | 141063 | 1  | 642  | ZP_0009654 | Holliday junction resolvosome, D    | 181  | 7.00E-45  | COG0632 | L   |
| ZMO0156 | 141482 | 141126 | -3 | 357  |            | hypothetical protein                |      |           |         | -   |
| ZMO0157 | 142620 | 141697 | -1 | 924  | NP_535169  | 2-hydroxyacid dehydrogenase         | 254  | 1.00E-66  | COG1052 | CHR |
| ZMO0158 | 142769 | 143812 | 2  | 1044 | ZP_0009654 | Holliday junction resolvosome, h    | 505  | 1.00E-142 | COG2255 | L   |
| ZMO0159 | 143992 | 144120 | 1  | 129  |            | hypothetical protein                |      |           |         | -   |
| ZMO0160 | 144121 | 144492 | 1  | 372  | ZP_0009594 | thioesterase, predicted             | 106  | 1.00E-22  | COG0824 | R   |
| ZMO0161 | 144500 | 145054 | 2  | 555  | ZP_0009594 | biopolymer transport proteins, Tc   | 95.1 | 6.00E-19  | COG0811 | U   |
| ZMO0162 | 145216 | 145743 | 1  | 528  | ZP_0009657 | biopolymer transport protein, Toll  | 132  | 4.00E-30  | COG0848 | U   |
| ZMO0163 | 145771 | 146178 | 1  | 408  | EAA53379   | conserved hypothetical protein      | 56.2 | 1.00E-07  | COG0810 | M   |
| ZMO0164 | 146153 | 146833 | 2  | 681  | ZP_0009594 | periplasmic protein TonB, links in  | 100  | 2.00E-20  | -       | -   |
| ZMO0165 | 146887 | 148263 | 1  | 1377 | ZP_0009594 | periplasmic component of the To     | 546  | 1.00E-154 | COG0823 | U   |
| ZMO0166 | 148390 | 148920 | 1  | 531  | ZP_0009658 | outer membrane protein and rela     | 166  | 2.00E-40  | COG2885 | M   |
| ZMO0167 | 149071 | 148928 | -2 | 144  |            | hypothetical protein                |      |           |         | -   |
| ZMO0168 | 149502 | 149101 | -1 | 402  | NP_518623  | glycerophosphoryl diester phosp     | 164  | 2.00E-40  | COG0584 | C   |
| ZMO0169 | 151579 | 150842 | -2 | 738  | NP_103600  | short chain oxidoreductase, puta    | 176  | 5.00E-43  | COG1028 | IQR |
| ZMO0170 | 152619 | 152074 | -1 | 546  | NP_644661  | glycerophosphoryl diester phosp     | 132  | 4.00E-30  | COG0584 | C   |
| ZMO0171 | 155028 | 153520 | -1 | 1509 | NP_419539  | TonB-dependent receptor             | 436  | 1.00E-121 | COG1629 | P   |
| ZMO0172 | 155420 | 157234 | 2  | 1815 | ZP_0009344 | thiamine biosynthesis protein thi   | 938  | 0         | COG0422 | H   |
| ZMO0173 | 158150 | 157755 | -3 | 396  | NP_422041  | conserved hypothetical protein      | 64.3 | 4.00E-10  | COG3027 | S   |
| ZMO0174 | 158735 | 158349 | -3 | 387  | NP_903384  | conserved hypothetical protein      | 80   | 6.00E-15  | -       | -   |
| ZMO0175 | 159227 | 158952 | -3 | 276  |            | hypothetical protein                |      |           |         | -   |
| ZMO0176 | 159445 | 161436 | 1  | 1992 | ZP_0009550 | transketolase                       | 790  | 0         | COG0021 | G   |
| ZMO0177 | 161486 | 162499 | 2  | 1014 | P09316     | G3P_glyceraldehyde 3-phosphate deh  | 661  | 0         | COG0057 | G   |
| ZMO0178 | 162722 | 163915 | 2  | 1194 | P09404     | PGK_phosphoglycerate kinase         | 772  | 0         | COG0126 | G   |
| ZMO0179 | 164684 | 165598 | 2  | 915  | AAS14884   | fructose-bisphosphate aldolase      | 357  | 2.00E-97  | COG1830 | G   |
| ZMO0180 | 166885 | 165758 | -2 | 1128 | ZP_0009655 | enzyme involved in the deoxyxyl     | 621  | 1.00E-177 | COG0821 | I   |
| ZMO0181 | 166940 | 167068 | 2  | 129  |            | hypothetical protein                |      |           |         | -   |
| ZMO0182 | 167266 | 168660 | 1  | 1395 | ZP_0009509 | S-adenosylhomocysteine hydroly      | 717  | 0         | COG0499 | H   |
| ZMO0183 | 170633 | 168957 | -3 | 1677 | ZP_0009426 | ABC transporters with duplicated    | 883  | 0         | COG0488 | R   |
| ZMO0184 | 171345 | 171584 | 3  | 240  |            | hypothetical protein                |      |           |         | -   |
| ZMO0185 | 171287 | 171162 | -3 | 126  |            | hypothetical protein                |      |           |         | -   |
| ZMO0186 | 171805 | 173355 | 1  | 1551 | ZP_0009526 | cysteinyI-tRNA synthetase           | 558  | 1.00E-157 | COG0215 | J   |
| ZMO0187 | 173448 | 174776 | 3  | 1329 | ZP_0009592 | 3-deoxy-D-arabino-heptulosonat      | 492  | 1.00E-138 | COG3200 | E   |
| ZMO0188 | 175355 | 177721 | 2  | 2367 | Q08017     | PBU_ferric-pseudobactin M114 recept | 401  | 1.00E-110 | COG4773 | P   |
| ZMO0189 | 179105 | 177750 | -3 | 1356 | NP_421902  | L-serine dehydratase                | 501  | 1.00E-140 | COG1760 | E   |
| ZMO0190 | 180113 | 179202 | -3 | 912  | NP_104268  | transcriptional regulator, hypothe  | 152  | 1.00E-35  | COG1737 | K   |
| ZMO0191 | 181226 | 180453 | -3 | 774  | ZP_0005390 | protein-disulfide isomerase         | 135  | 1.00E-30  | COG1651 | O   |
| ZMO0192 | 182579 | 181263 | -3 | 1317 | ZP_0009676 | Zn-dependent protease contains      | 386  | 1.00E-106 | COG4783 | R   |
| ZMO0193 | 185689 | 182957 | -2 | 2733 | NP_420684  | ribonuclease, Rne/Rng family pr     | 679  | 0         | COG1530 | J   |
| ZMO0194 | 186017 | 186274 | 2  | 258  |            | hypothetical protein                |      |           |         | -   |
| ZMO0195 | 186454 | 187242 | 1  | 789  | ZP_0009571 | N-acetylmuramoyl-L-alanine ami      | 204  | 1.00E-51  | COG0860 | M   |
| ZMO0196 | 187309 | 187461 | 1  | 153  |            | hypothetical protein                |      |           |         | -   |
| ZMO0197 | 187454 | 190033 | 2  | 2580 | ZP_0009571 | membrane carboxypeptidase/pe        | 804  | 0         | COG5009 | M   |
| ZMO0198 | 190144 | 191271 | 1  | 1128 | ZP_0009572 | protein chain release factor B      | 553  | 1.00E-156 | COG1186 | J   |
| ZMO0199 | 191974 | 191327 | -2 | 648  | ZP_0009512 | SOS-response transcriptional re     | 276  | 3.00E-73  | COG1974 | KT  |
| ZMO0200 | 193165 | 192146 | -2 | 1020 | ZP_0009511 | anthranilate phosphoribosyltrans    | 321  | 1.00E-86  | COG0547 | E   |
| ZMO0201 | 193821 | 193198 | -1 | 624  | ZP_0009511 | anthranilate/para-aminobenzoate     | 265  | 4.00E-70  | COG0512 | EH  |
| ZMO0202 | 194772 | 196664 | 3  | 1893 | NP_419249  | chemotaxis methyl-accepting prc     | 348  | 2.00E-94  | COG0840 | NT  |
| ZMO0203 | 197152 | 196709 | -2 | 444  | NP_948600  | heavy metal resistance transcrip    | 135  | 1.00E-31  | COG0789 | K   |
| ZMO0204 | 197207 | 197854 | 2  | 648  | ZP_0008878 | Co/Zn/Cd efflux system compon       | 168  | 8.00E-41  | COG1230 | P   |
| ZMO0205 | 198778 | 197861 | -2 | 918  | ZP_0009485 | nucleoside-diphosphate-sugar e      | 285  | 8.00E-76  | COG0702 | MG  |
| ZMO0206 | 199968 | 198781 | -1 | 1188 | ZP_0009485 | glutamate 5-kinase                  | 384  | 1.00E-105 | COG0263 | E   |
| ZMO0207 | 200996 | 199959 | -3 | 1038 | ZP_0009485 | GTPase, predicted                   | 475  | 1.00E-133 | COG0536 | R   |
| ZMO0208 | 201696 | 201094 | -1 | 603  |            | hypothetical protein                |      |           |         | -   |
| ZMO0209 | 202158 | 201895 | -1 | 264  | ZP_0009375 | ribosomal protein L27               | 153  | 8.00E-37  | COG0211 | J   |
| ZMO0210 | 202206 | 202328 | 3  | 123  |            | hypothetical protein                |      |           |         | -   |
| ZMO0211 | 202665 | 202297 | -1 | 369  | ZP_0009375 | ribosomal protein L21               | 152  | 2.00E-36  | COG0261 | J   |
| ZMO0212 | 202781 | 202900 | 2  | 120  |            | hypothetical protein                |      |           |         | -   |
| ZMO0213 | 205377 | 202909 | -1 | 2469 | NP_887465  | autotransporter                     | 295  | 3.00E-78  | COG4625 | S   |
| ZMO0214 | 208043 | 206595 | -3 | 1449 | NP_946153  | cation efflux pump, DNA-damage      | 246  | 7.00E-64  | COG0534 | V   |
| ZMO0215 | 208259 | 208921 | 2  | 663  | NP_422039  | 5-formyltetrahydrofolate cyclo-lig  | 113  | 3.00E-24  | COG0212 | H   |
| ZMO0216 | 210407 | 209004 | -3 | 1404 | ZP_0009606 | membrane proteins related to me     | 211  | 2.00E-53  | COG0739 | M   |
| ZMO0217 | 210618 | 210421 | -1 | 198  |            | hypothetical protein                |      |           |         | -   |
| ZMO0218 | 210739 | 210858 | 1  | 120  |            | hypothetical protein                |      |           |         | -   |
| ZMO0219 | 210925 | 213756 | 1  | 2832 | NP_766799  | helicase, ATP-dependent             | 640  | 0         | COG0513 | LKJ |
| ZMO0220 | 213988 | 214326 | 1  | 339  | ZP_0009642 | ferredoxin                          | 205  | 1.00E-52  | COG1146 | C   |
| ZMO0221 | 214655 | 215209 | 2  | 555  | ZP_0009642 | transcriptional regulators, similar | 265  | 4.00E-70  | COG1329 | K   |
| ZMO0222 | 215423 | 215722 | 2  | 300  | NP_108090  | conserved hypothetical protein      | 110  | 8.00E-24  | COG5470 | S   |
| ZMO0223 | 215802 | 216563 | 3  | 762  | ZP_0001805 | conserved hypothetical protein      | 74.3 | 2.00E-12  | -       | -   |
| ZMO0224 | 217216 | 216575 | -2 | 642  | NP_104622  | conserved hypothetical protein      | 194  | 1.00E-48  | COG0500 | QR  |
| ZMO0225 | 218337 | 217222 | -1 | 1116 | ZP_0005595 | homoserine acetyltransferase        | 489  | 1.00E-137 | COG2021 | E   |
| ZMO0226 | 218719 | 219468 | 1  | 750  | NP_534594  | serine dehydrogenase                | 328  | 1.00E-88  | COG4221 | R   |
| ZMO0227 | 219484 | 222249 | 1  | 2766 | ZP_0009680 | DNA polymerase I - 3'-5' exonucl    | 1055 | 0         | COG0749 | L   |
| ZMO0228 | 222231 | 223634 | 3  | 1404 | ZP_0009385 | membrane protein involved in the    | 389  | 1.00E-110 | COG2244 | R   |
| ZMO0229 | 223778 | 224824 | 2  | 1047 | ZP_0000559 | ABC-type Fe3+-siderophore tran      | 267  | 3.00E-70  | COG0609 | P   |

|         |        |        |    |      |             |                                       |      |           |         |      |
|---------|--------|--------|----|------|-------------|---------------------------------------|------|-----------|---------|------|
| ZMO0230 | 224821 | 225606 | 1  | 786  | ZP_0001651f | ABC-type cobalamin/Fe3+-sidero        | 195  | 7.00E-49  | COG1120 | PH   |
| ZMO0231 | 225865 | 226380 | 1  | 516  | ZP_0009656f | conserved hypothetical protein        | 199  | 4.00E-50  | -       | -    |
| ZMO0232 | 227243 | 226500 | -3 | 744  | ZP_0009464f | rRNA methylases                       | 290  | 2.00E-77  | COG0566 | J    |
| ZMO0233 | 228202 | 227822 | -2 | 381  | NP_355784   | conserved hypothetical protein        | 77   | 6.00E-14  | COG3631 | R    |
| ZMO0234 | 229956 | 228301 | -1 | 1656 | ZP_0009668f | trypsin-like serine proteases, typ    | 544  | 1.00E-153 | COG0265 | O    |
| ZMO0235 | 230425 | 230306 | -2 | 120  | -           | hypothetical protein                  | -    | -         | -       | -    |
| ZMO0236 | 230409 | 231437 | 3  | 1029 | ZP_0009668f | ATPases involved in chromosom         | 276  | 6.00E-73  | COG0489 | D    |
| ZMO0237 | 231554 | 231453 | -3 | 102  | -           | hypothetical protein                  | -    | -         | -       | -    |
| ZMO0238 | 231871 | 232425 | 1  | 555  | ZP_0009524f | ATP synthase, delta subunit           | 149  | 3.00E-35  | COG0712 | C    |
| ZMO0239 | 232428 | 233957 | 3  | 1530 | ZP_0009524f | ATP synthase, alpha subunit           | 808  | 0         | COG0056 | C    |
| ZMO0240 | 233991 | 234887 | 3  | 897  | ZP_0005046f | ATP synthase, gamma subunit           | 289  | 5.00E-77  | COG0224 | C    |
| ZMO0241 | 234916 | 236370 | 1  | 1455 | ZP_0005525f | ATP synthase, beta subunit            | 746  | 0         | COG0055 | C    |
| ZMO0242 | 236430 | 236696 | 3  | 267  | ZP_0009325f | ATP synthase, epsilon subunit         | 92   | 2.00E-18  | COG0355 | C    |
| ZMO0243 | 237895 | 237098 | -2 | 798  | ZP_0009518f | conserved hypothetical protein        | 186  | 4.00E-46  | -       | -    |
| ZMO0244 | 238465 | 238196 | -2 | 270  | ZP_0009351f | DNA-binding protein (HU)              | 116  | 1.00E-25  | COG0776 | L    |
| ZMO0245 | 238673 | 238810 | 2  | 138  | -           | hypothetical protein                  | -    | -         | -       | -    |
| ZMO0246 | 239003 | 239557 | 2  | 555  | ZP_0009482f | heat shock protein, ATP-depend        | 288  | 3.00E-77  | COG5405 | O    |
| ZMO0247 | 239582 | 240874 | 2  | 1293 | ZP_0009416f | heat shock protein, ATP-depend        | 622  | 1.00E-177 | COG1220 | O    |
| ZMO0248 | 240896 | 241090 | 2  | 195  | -           | hypothetical protein                  | -    | -         | -       | -    |
| ZMO0249 | 241160 | 241327 | 2  | 168  | ZP_0009582f | ribosomal protein L33                 | 105  | 3.00E-22  | COG0267 | J    |
| ZMO0250 | 241802 | 241446 | -3 | 357  | ZP_0009450f | two-component CheY-like receiv        | 144  | 3.00E-34  | COG0784 | T    |
| ZMO0251 | 241977 | 242435 | 3  | 459  | ZP_0009450f | translation initiation inhibitor yjgF | 199  | 3.00E-50  | COG0251 | J    |
| ZMO0252 | 242784 | 251738 | 3  | 8955 | NP_286230   | RTX family exoprotein, autotrans      | 608  | 1.00E-172 | -       | -    |
| ZMO0253 | 251743 | 253218 | 1  | 1476 | NP_742966   | outer membrane efflux protein         | 237  | 5.00E-61  | COG1538 | MU   |
| ZMO0254 | 253215 | 255362 | 3  | 2148 | NP_286231   | cytoplasmic membrane export pr        | 762  | 0         | COG2274 | V    |
| ZMO0255 | 255355 | 256536 | 1  | 1182 | NP_286232   | membrane spanning export prot         | 468  | 1.00E-130 | COG0845 | M    |
| ZMO0256 | 256658 | 258382 | 2  | 1725 | ZP_0003403f | FAD/FMN-containing dehydroge          | 739  | 0         | COG0277 | C    |
| ZMO0257 | 258605 | 259282 | 2  | 678  | ZP_0009492f | two-component transcriptional re      | 392  | 1.00E-108 | COG0745 | TK   |
| ZMO0258 | 259285 | 260742 | 1  | 1458 | ZP_0009491f | two-component sensor histidine l      | 509  | 1.00E-143 | COG0642 | T    |
| ZMO0259 | 260986 | 260876 | -2 | 111  | -           | hypothetical protein                  | -    | -         | -       | -    |
| ZMO0260 | 260993 | 261604 | 2  | 612  | ZP_0009436f | ABC-type transport system invol       | 185  | 4.00E-46  | COG4133 | O    |
| ZMO0261 | 261573 | 261722 | 3  | 150  | -           | hypothetical protein                  | -    | -         | -       | -    |
| ZMO0262 | 261712 | 262248 | 1  | 537  | ZP_0009436f | ABC-type transport system invol       | 204  | 8.00E-52  | COG2386 | O    |
| ZMO0263 | 263654 | 262257 | -3 | 1398 | -           | hypothetical protein                  | -    | -         | -       | -    |
| ZMO0264 | 265163 | 263715 | -3 | 1449 | -           | hypothetical protein                  | -    | -         | -       | -    |
| ZMO0265 | 266627 | 265203 | -3 | 1425 | -           | hypothetical protein                  | -    | -         | -       | -    |
| ZMO0266 | 268109 | 266688 | -3 | 1422 | -           | hypothetical protein                  | -    | -         | -       | -    |
| ZMO0267 | 269612 | 268170 | -3 | 1443 | -           | hypothetical protein                  | -    | -         | -       | -    |
| ZMO0268 | 271070 | 269652 | -3 | 1419 | -           | hypothetical protein                  | -    | -         | -       | -    |
| ZMO0269 | 272546 | 271131 | -3 | 1416 | -           | hypothetical protein                  | -    | -         | -       | -    |
| ZMO0270 | 274082 | 272607 | -3 | 1476 | -           | hypothetical protein                  | -    | -         | -       | -    |
| ZMO0271 | 275186 | 276472 | 2  | 1287 | ZP_0009681f | apolipoprotein N-acyltransferase      | 290  | 5.00E-77  | COG0815 | M    |
| ZMO0272 | 276672 | 276472 | -1 | 201  | -           | hypothetical protein                  | -    | -         | -       | -    |
| ZMO0273 | 276665 | 277840 | 2  | 1176 | ZP_0009681f | S-adenosylmethionine synthetas        | 570  | 1.00E-161 | COG0192 | H    |
| ZMO0274 | 279411 | 277918 | -1 | 1494 | ZP_0009682f | DNA-directed RNA polymerase s         | 471  | 1.00E-131 | COG1508 | K    |
| ZMO0275 | 280253 | 279465 | -3 | 789  | ZP_0009682f | ABC-type (unclassified) transpor      | 376  | 1.00E-103 | COG1137 | R    |
| ZMO0276 | 281052 | 280462 | -1 | 591  | ZP_0009558f | conserved hypothetical protein        | 120  | 2.00E-26  | COG1934 | S    |
| ZMO0277 | 281696 | 281064 | -3 | 633  | ZP_0009558f | conserved hypothetical protein        | 131  | 8.00E-30  | COG5375 | S    |
| ZMO0278 | 282346 | 281735 | -2 | 612  | ZP_0009558f | ribonuclease D, 3'-5' exonucleas      | 313  | 1.00E-84  | COG0349 | J    |
| ZMO0279 | 282879 | 283409 | 3  | 531  | ZP_0009352f | cold shock proteins                   | 242  | 8.00E-63  | COG1278 | K    |
| ZMO0280 | 283440 | 283595 | 3  | 156  | -           | hypothetical protein                  | -    | -         | -       | -    |
| ZMO0281 | 284446 | 283805 | -2 | 642  | ZP_0000551f | transcriptional regulator, tetR far   | 79.7 | 4.00E-14  | COG1309 | K    |
| ZMO0282 | 284674 | 285843 | 1  | 1170 | NP_286204   | acridine efflux pump                  | 351  | 1.00E-95  | COG0845 | M    |
| ZMO0283 | 285847 | 288990 | 1  | 3144 | NP_249117   | RND multidrug efflux transporter      | 1242 | 0         | COG0841 | V    |
| ZMO0284 | 288990 | 289589 | 3  | 600  | ZP_0008101f | outer membrane protein                | 126  | 2.00E-28  | COG1538 | MU   |
| ZMO0285 | 289769 | 290524 | 2  | 756  | NP_518130   | probable drug efflux lipoprotein      | 204  | 1.00E-51  | COG1538 | MU   |
| ZMO0286 | 291368 | 290574 | -3 | 795  | AAG02145    | outer membrane protein                | 350  | 1.00E-95  | COG2968 | S    |
| ZMO0287 | 291695 | 292843 | 2  | 1149 | NP_386567   | transport transmembrane protein       | 132  | 2.00E-29  | COG0845 | M    |
| ZMO0288 | 292989 | 292870 | -1 | 120  | -           | hypothetical protein                  | -    | -         | -       | -    |
| ZMO0289 | 292976 | 292827 | -3 | 150  | -           | hypothetical protein                  | -    | -         | -       | -    |
| ZMO0290 | 292972 | 294228 | 1  | 1257 | ZP_0009664f | membrane protein, predicted           | 258  | 2.00E-67  | COG2733 | S    |
| ZMO0291 | 295048 | 294221 | -2 | 828  | AA053572    | prolipoprotein diacylglycerol tran    | 253  | 4.00E-66  | COG0682 | M    |
| ZMO0292 | 295207 | 295317 | 1  | 111  | -           | hypothetical protein                  | -    | -         | -       | -    |
| ZMO0293 | 296775 | 295339 | -1 | 1437 | NP_391860   | metabolite (sugar) transport prot     | 276  | 5.00E-73  | COG0477 | GEPR |
| ZMO0294 | 297636 | 297466 | -1 | 171  | NP_945846   | ribosomal protein L28                 | 64.7 | 4.00E-10  | COG0227 | J    |
| ZMO0295 | 297686 | 297799 | 2  | 114  | -           | hypothetical protein                  | -    | -         | -       | -    |
| ZMO0296 | 298056 | 298538 | 3  | 483  | NP_946515   | cytidine and deoxycytidylate dea      | 171  | 3.00E-42  | COG0590 | FJ   |
| ZMO0297 | 298787 | 300112 | 2  | 1326 | ZP_0009552f | hemolysins and related proteins       | 429  | 1.00E-119 | COG1253 | R    |
| ZMO0298 | 300905 | 300213 | -3 | 693  | NP_104209   | conserved hypothetical protein, s     | 101  | 1.00E-20  | COG3743 | S    |
| ZMO0299 | 302317 | 301070 | -2 | 1248 | Q9FDL5 PUF  | phosphoribosylamine-glycine lig       | 733  | 0         | COG0151 | F    |
| ZMO0300 | 302319 | 303953 | 3  | 1635 | Q9FDL4 EX7  | exodeoxyribonuclease VII large s      | 1061 | 0         | COG1570 | L    |
| ZMO0301 | 304099 | 304851 | 1  | 753  | NP_643253   | conserved hypothetical protein        | 152  | 4.00E-36  | COG3295 | S    |
| ZMO0302 | 305116 | 304826 | -2 | 291  | NP_948839   | conserved hypothetical protein        | 59.3 | 2.00E-08  | COG4321 | R    |
| ZMO0303 | 306078 | 305128 | -1 | 951  | P57779 HEM  | ferrochelatase (protoheme ferro-      | 620  | 1.00E-176 | COG0276 | H    |
| ZMO0304 | 306071 | 306262 | 2  | 192  | -           | hypothetical protein                  | -    | -         | -       | -    |
| ZMO0305 | 306747 | 306280 | -1 | 468  | EAA54023    | conserved hypothetical protein        | 59.3 | 2.00E-08  | -       | -    |
| ZMO0306 | 308109 | 306847 | -1 | 1263 | AAK26455    | putative glycosyltransferase Wct      | 150  | 4.00E-35  | COG0438 | M    |

|         |        |        |    |      |             |                                       |      |           |         |      |
|---------|--------|--------|----|------|-------------|---------------------------------------|------|-----------|---------|------|
| ZMO0307 | 309870 | 308143 | -1 | 1728 | P42217 KSC  | capsule polysaccharide export p       | 252  | 2.00E-65  | COG3563 | M    |
| ZMO0308 | 310007 | 310144 | 2  | 138  |             | hypothetical protein                  |      |           | -       | -    |
| ZMO0309 | 310425 | 311222 | 3  | 798  | NP_636454   | oxidoreductase                        | 364  | 1.00E-99  | COG1028 | IQR  |
| ZMO0310 | 311204 | 311308 | 2  | 105  |             | hypothetical protein                  |      |           | -       | -    |
| ZMO0311 | 312100 | 311291 | -2 | 810  | NP_622979   | pyrroline-5-carboxylate reductas      | 154  | 1.00E-36  | COG0345 | E    |
| ZMO0312 | 312306 | 313448 | 3  | 1143 | NP_833392   | N-acyl-L-amino acid amidohydro        | 370  | 1.00E-101 | COG1473 | R    |
| ZMO0313 | 313478 | 313960 | 2  | 483  | BAB15928    | L-2-Amino-thiazoline-4-carboxyli      | 179  | 2.00E-44  | -       | -    |
| ZMO0314 | 315414 | 314002 | -1 | 1413 | NP_639367   | cardiolipin synthase                  | 331  | 2.00E-89  | COG1502 | I    |
| ZMO0315 | 315670 | 315485 | -2 | 186  |             | hypothetical protein                  |      |           | -       | -    |
| ZMO0316 | 315707 | 315895 | 2  | 189  |             | hypothetical protein                  |      |           | -       | -    |
| ZMO0317 | 316217 | 316014 | -3 | 204  |             | hypothetical protein                  |      |           | -       | -    |
| ZMO0318 | 316209 | 316964 | 3  | 756  | NP_231231   | oxidoreductase, short-chain dehy      | 307  | 1.00E-82  | COG1028 | IQR  |
| ZMO0319 | 317282 | 317040 | -3 | 243  | NP_085648   | conserved hypothetical protein        | 56.2 | 1.00E-07  | COG3831 | S    |
| ZMO0320 | 317573 | 317752 | 2  | 180  |             | hypothetical protein                  |      |           | -       | -    |
| ZMO0321 | 317899 | 318396 | 1  | 498  | NP_539526   | dihydrofolate reductase               | 125  | 5.00E-28  | COG0262 | H    |
| ZMO0322 | 318735 | 319679 | 3  | 945  | NP_419520   | riboflavin biosynthesis protein Ri    | 251  | 1.00E-65  | COG0196 | H    |
| ZMO0323 | 319798 | 322623 | 1  | 2826 | NP_419518   | isoleucyl-tRNA synthetase             | 874  | 0         | COG0060 | J    |
| ZMO0324 | 322627 | 323151 | 1  | 525  | ZP_0009559  | lipoprotein signal peptidase          | 133  | 1.00E-30  | COG0597 | MU   |
| ZMO0325 | 323236 | 323748 | 1  | 513  | ZP_0009559  | conserved hypothetical protein        | 103  | 2.00E-21  | -       | -    |
| ZMO0326 | 324205 | 323768 | -2 | 438  | ZP_0009598  | enzyme related to GTP cyclohyd        | 242  | 8.00E-64  | COG0780 | R    |
| ZMO0327 | 324392 | 326440 | 2  | 2049 | NP_717789   | cystathionine beta-lyase              | 436  | 1.00E-121 | COG0626 | E    |
| ZMO0328 | 326596 | 327159 | 1  | 564  | NP_698695   | translation elongation factor P       | 251  | 1.00E-65  | COG0231 | J    |
| ZMO0329 | 327159 | 327974 | 3  | 816  | ZP_0009549  | archaeal fructose-1,6-bisphosph       | 372  | 1.00E-102 | COG0483 | G    |
| ZMO0330 | 328139 | 327963 | -3 | 177  |             | hypothetical protein                  |      |           | -       | -    |
| ZMO0331 | 328420 | 329016 | 1  | 597  | NP_706845   | conserved hypothetical protein        | 126  | 3.00E-28  | COG3108 | S    |
| ZMO0332 | 329794 | 329084 | -2 | 711  | NP_422058   | thiamine-phosphate pyrophosph         | 195  | 7.00E-49  | COG0352 | H    |
| ZMO0333 | 330146 | 329976 | -3 | 171  |             | hypothetical protein                  |      |           | -       | -    |
| ZMO0334 | 330029 | 330196 | 2  | 168  |             | hypothetical protein                  |      |           | -       | -    |
| ZMO0335 | 330186 | 330971 | 3  | 786  | ZP_0009670  | ATPases involved in chromosom         | 289  | 3.00E-77  | COG1192 | D    |
| ZMO0336 | 331068 | 331742 | 3  | 675  | AAS14729    | DnaJ domain protein                   | 61.6 | 1.00E-08  | COG2214 | O    |
| ZMO0337 | 331732 | 331845 | 1  | 114  |             | hypothetical protein                  |      |           | -       | -    |
| ZMO0338 | 331849 | 331742 | -2 | 108  |             | hypothetical protein                  |      |           | -       | -    |
| ZMO0339 | 331883 | 333262 | 2  | 1380 | AAF19992    | phosphoglucosyltransferase            | 660  | 0         | COG1109 | G    |
| ZMO0340 | 333237 | 333389 | 3  | 153  |             | hypothetical protein                  |      |           | -       | -    |
| ZMO0341 | 333449 | 334228 | 2  | 780  | NP_952627   | oxidoreductase, short chain dehy      | 339  | 4.00E-92  | COG1028 | IQR  |
| ZMO0342 | 335489 | 334293 | -3 | 1197 | AAR38379    | aspartate aminotransferase            | 503  | 1.00E-141 | COG0436 | E    |
| ZMO0343 | 336283 | 335618 | -2 | 666  | ZP_0009652  | anthranilate/para-aminobenzoate       | 130  | 2.00E-29  | COG0115 | EH   |
| ZMO0344 | 336589 | 338031 | 1  | 1443 | ZP_0009655  | Zn-dependent proteases and the        | 716  | 0         | COG0312 | R    |
| ZMO0345 | 338326 | 339039 | 1  | 714  | ZP_0009475  | hydrolase, metal-dependent            | 208  | 8.00E-53  | COG3568 | R    |
| ZMO0346 | 339240 | 340589 | 3  | 1350 | ZP_0009475  | ammonia permease                      | 505  | 1.00E-142 | COG0004 | P    |
| ZMO0347 | 340984 | 341469 | 1  | 486  | ZP_0009320  | host factor I protein, uncharacter    | 190  | 9.00E-48  | COG1923 | R    |
| ZMO0348 | 341466 | 342848 | 3  | 1383 | ZP_0009320  | GTPases. GTP binding protein          | 492  | 1.00E-138 | COG2262 | R    |
| ZMO0349 | 342869 | 343435 | 2  | 567  | ZP_0009474  | transcriptional regulator, putative   | 174  | 8.00E-43  | COG1678 | K    |
| ZMO0350 | 343575 | 344201 | 3  | 627  | NP_947369   | conserved hypothetical protein        | 242  | 4.00E-63  | COG4318 | S    |
| ZMO0351 | 344424 | 349625 | 3  | 5202 | ZP_0012374  | superfamily I DNA and RNA helic       | 1710 | 0         | COG1112 | L    |
| ZMO0352 | 349727 | 351358 | 2  | 1632 | NP_811791   | conserved hypothetical protein        | 119  | 2.00E-25  | -       | -    |
| ZMO0353 | 351403 | 352746 | 1  | 1344 | NP_810564   | pyrophosphorylase                     | 300  | 4.00E-80  | COG1211 | I    |
| ZMO0354 | 354773 | 352887 | -3 | 1887 | ZP_0009534  | DNA mismatch repair enzyme (p         | 664  | 0         | COG0323 | L    |
| ZMO0355 | 354983 | 356029 | 2  | 1047 | ZP_0009534  | ATPase involved in cell morphog       | 546  | 1.00E-154 | COG1077 | D    |
| ZMO0356 | 356060 | 357079 | 2  | 1020 | ZP_0009534  | cell (rod) shape-determining prot     | 209  | 7.00E-53  | COG1792 | M    |
| ZMO0357 | 357093 | 357644 | 3  | 552  | ZP_0009534  | conserved hypothetical protein        | 117  | 1.00E-25  | -       | -    |
| ZMO0358 | 357798 | 357688 | -1 | 111  |             | hypothetical protein                  |      |           | -       | -    |
| ZMO0359 | 357835 | 359703 | 1  | 1869 | ZP_0009533  | cell division protein FtsI/penicillin | 700  | 0         | COG0768 | M    |
| ZMO0360 | 359715 | 360821 | 3  | 1107 | NP_716792   | rod shape-determining protein R       | 316  | 6.00E-85  | COG0772 | D    |
| ZMO0361 | 361428 | 362420 | 3  | 993  |             | hypothetical protein                  |      |           | -       | -    |
| ZMO0362 | 362518 | 364740 | 1  | 2223 | NP_386007   | excinuclease ABC subunit B            | 949  | 0         | COG0556 | L    |
| ZMO0363 | 364874 | 366073 | 2  | 1200 | AAA27705    | tRNA guanine transglycosylase (       | 791  | 0         | COG0343 | J    |
| ZMO0364 | 366120 | 368315 | 3  | 2196 | P28719 DNL  | DNA ligase (polydeoxyribonuclec       | 1431 | 0         | COG0272 | L    |
| ZMO0365 | 368372 | 368473 | 2  | 102  |             | hypothetical protein                  |      |           | -       | -    |
| ZMO0366 | 368688 | 370109 | 3  | 1422 | P21906 GLF  | glucose facilitated diffusion prote   | 933  | 0         | COG0477 | GEPR |
| ZMO0367 | 370255 | 371712 | 1  | 1458 | P21907 G6P  | glucose-6-phosphate 1-dehydroc        | 971  | 0         | COG0364 | G    |
| ZMO0368 | 371705 | 373528 | 2  | 1824 | P21909 EDD  | phosphoglucosyltransferase (          | 1163 | 0         | COG0129 | EG   |
| ZMO0369 | 373661 | 374635 | 2  | 975  | P21908 GLK  | glucokinase (glucose kinase)          | 617  | 1.00E-176 | COG0837 | G    |
| ZMO0370 | 374727 | 374608 | -1 | 120  |             | hypothetical protein                  |      |           | -       | -    |
| ZMO0371 | 375824 | 375141 | -3 | 684  | NP_534566   | aspartate racemase                    | 350  | 2.00E-95  | COG1794 | M    |
| ZMO0372 | 375999 | 376460 | 3  | 462  | Q57001 ZRP  | global regulatory protein             | 299  | 1.00E-80  | COG1522 | K    |
| ZMO0373 | 376810 | 376460 | -2 | 351  |             | hypothetical protein                  |      |           | -       | -    |
| ZMO0374 | 377648 | 378919 | 2  | 1272 | Q60114 SAC  | levansucrase (beta-D-fructofurar      | 893  | 0         | -       | -    |
| ZMO0375 | 379075 | 380316 | 1  | 1242 | Q60115 INVE | extracellular sucrose (beta-fructo    | 868  | 0         | -       | -    |
| ZMO0376 | 383030 | 380610 | -3 | 2421 | ZP_0009465  | ATP-dependent Lon protease, ba        | 1122 | 0         | COG0466 | O    |
| ZMO0377 | 383220 | 383849 | 3  | 630  | ZP_0009436  | 3-methyladenine DNA glycosylas        | 153  | 2.00E-36  | COG0122 | L    |
| ZMO0378 | 383933 | 384439 | 2  | 507  | NP_881914   | conserved hypothetical protein, f     | 109  | 2.00E-23  | -       | -    |
| ZMO0379 | 384439 | 385725 | 1  | 1287 | NP_958178   | gene 2 protein, terminase [Enter      | 134  | 5.00E-30  | COG1783 | R    |
| ZMO0380 | 385768 | 387957 | 1  | 2190 | NP_775254   | putative portal protein [P. aerugir   | 285  | 3.00E-75  | -       | -    |
| ZMO0381 | 387957 | 388256 | 3  | 300  |             | hypothetical protein                  |      |           | -       | -    |
| ZMO0382 | 388306 | 388476 | 1  | 171  |             | hypothetical protein                  |      |           | -       | -    |
| ZMO0383 | 388445 | 389230 | 2  | 786  |             | hypothetical protein                  |      |           | -       | -    |

|         |        |        |    |      |                      |                                    |      |           |         |   |    |  |  |
|---------|--------|--------|----|------|----------------------|------------------------------------|------|-----------|---------|---|----|--|--|
| ZMO0384 | 389256 | 389363 | 3  | 108  | hypothetical protein |                                    |      |           |         |   |    |  |  |
| ZMO0385 | 389548 | 389667 | 1  | 120  | hypothetical protein |                                    |      |           |         |   |    |  |  |
| ZMO0386 | 389715 | 389602 | -1 | 114  | hypothetical protein |                                    |      |           |         |   |    |  |  |
| ZMO0387 | 389894 | 390610 | 2  | 717  | NP_775251            | major head protein [P. aeruginos   | 102  | 8.00E-21  | -       | - |    |  |  |
| ZMO0388 | 390746 | 391090 | 2  | 345  | hypothetical protein |                                    |      |           |         |   |    |  |  |
| ZMO0389 | 391100 | 391759 | 2  | 660  | NP_775249            | constituent protein [P. aeruginos  | 61.6 | 1.00E-08  | -       | - |    |  |  |
| ZMO0390 | 391753 | 393174 | 1  | 1422 | hypothetical protein |                                    |      |           |         |   |    |  |  |
| ZMO0391 | 393144 | 393419 | 3  | 276  | hypothetical protein |                                    |      |           |         |   |    |  |  |
| ZMO0392 | 393398 | 393901 | 2  | 504  | hypothetical protein |                                    |      |           |         |   |    |  |  |
| ZMO0393 | 393902 | 394573 | 2  | 672  | hypothetical protein |                                    |      |           |         |   |    |  |  |
| ZMO0394 | 394586 | 395260 | 2  | 675  | hypothetical protein |                                    |      |           |         |   |    |  |  |
| ZMO0395 | 395440 | 395808 | 1  | 369  | ZP_0009496           | conserved hypothetical protein     | 60.8 | 5.00E-09  | -       | - |    |  |  |
| ZMO0396 | 395754 | 395410 | -1 | 345  | hypothetical protein |                                    |      |           |         |   |    |  |  |
| ZMO0397 | 395805 | 396251 | 3  | 447  | hypothetical protein |                                    |      |           |         |   |    |  |  |
| ZMO0398 | 396205 | 396657 | 1  | 453  | ZP_0009495           | RTX toxins and related Ca2+-bin    | 64.3 | 4.00E-10  | -       | - |    |  |  |
| ZMO0399 | 396662 | 397663 | 2  | 1002 | NP_073695            | neck appendage protein precurs     | 122  | 1.00E-26  | -       | - |    |  |  |
| ZMO0400 | 397668 | 400322 | 3  | 2655 | hypothetical protein |                                    |      |           |         |   |    |  |  |
| ZMO0401 | 402380 | 400335 | -3 | 2046 | ZP_0012410           | signal transduction protein conta  | 327  | 7.00E-88  | COG5001 |   | T  |  |  |
| ZMO0402 | 403265 | 402606 | -3 | 660  | ZP_0009554           | 23S rRNA methylase (cell divisio   | 306  | 1.00E-82  | COG0293 |   | J  |  |  |
| ZMO0403 | 404365 | 403268 | -2 | 1098 | ZP_0009554           | exopolyphosphatase                 | 380  | 1.00E-104 | COG0248 |   | FP |  |  |
| ZMO0404 | 405047 | 405211 | 2  | 165  | hypothetical protein |                                    |      |           |         |   |    |  |  |
| ZMO0405 | 405319 | 407640 | 1  | 2322 | ZP_0009607           | ATPases with chaperone activity    | 1158 | 0         | COG0542 |   | O  |  |  |
| ZMO0406 | 408548 | 407733 | -3 | 816  | ZP_0009477           | ABC-type multidrug transport sys   | 294  | 1.00E-78  | COG0842 |   | V  |  |  |
| ZMO0407 | 408703 | 409395 | 1  | 693  | ZP_0009477           | conserved hypothetical protein     | 282  | 4.00E-75  | COG5352 |   | S  |  |  |
| ZMO0408 | 409612 | 410820 | 1  | 1209 | ZP_0009352           | ornithine/acetylornithine aminotr  | 542  | 1.00E-153 | COG4992 |   | E  |  |  |
| ZMO0409 | 410842 | 411792 | 1  | 951  | ZP_0009352           | ornithine carbamoyltransferase     | 445  | 1.00E-124 | COG0078 |   | E  |  |  |
| ZMO0410 | 411921 | 412844 | 3  | 924  | ZP_0009352           | heat shock protein, chaperone pr   | 276  | 3.00E-73  | COG1281 |   | O  |  |  |
| ZMO0411 | 412919 | 414901 | 2  | 1983 | ZP_0009494           | topoisomerase (DNA gyrase/topo     | 977  | 0         | COG0187 |   | L  |  |  |
| ZMO0412 | 415720 | 415100 | -2 | 621  | ZP_0009679           | multiple antibiotic transporter    | 218  | 8.00E-56  | COG2095 |   | U  |  |  |
| ZMO0413 | 416235 | 415915 | -1 | 321  | NP_387192            | conserved hypothetical transmer    | 97.1 | 7.00E-20  | COG0762 |   | S  |  |  |
| ZMO0414 | 417299 | 416265 | -3 | 1035 | NP_768029            | conserved hypothetical protein     | 73.9 | 4.00E-12  | -       |   | -  |  |  |
| ZMO0415 | 417409 | 417302 | -2 | 108  | hypothetical protein |                                    |      |           |         |   |    |  |  |
| ZMO0416 | 417463 | 418209 | 1  | 747  | ZP_0009387           | cell division involved ATPase Fts  | 236  | 2.00E-61  | COG2884 |   | D  |  |  |
| ZMO0417 | 418191 | 419081 | 3  | 891  | ZP_0009387           | cell division protein FtsX         | 135  | 1.00E-30  | COG2177 |   | S  |  |  |
| ZMO0418 | 419113 | 419724 | 1  | 612  | ZP_0009386           | conserved hypothetical protein     | 157  | 1.00E-37  | COG1434 |   | D  |  |  |
| ZMO0419 | 419773 | 420525 | 1  | 753  | ZP_0009386           | 1-acyl-sn-glycerol-3-phosphate a   | 145  | 1.00E-33  | COG0204 |   | I  |  |  |
| ZMO0420 | 421452 | 420577 | -1 | 876  | Q04983 TYR           | protein tyrC [includes: Cyclohex   | 573  | 1.00E-162 | COG0287 |   | E  |  |  |
| ZMO0421 | 422562 | 421459 | -1 | 1104 | P34037 HIS8          | histidinol-phosphate aminotransf   | 717  | 0         | COG0079 |   | E  |  |  |
| ZMO0422 | 423132 | 423539 | 3  | 408  | ZP_0009649           | predicted transcriptional regulato | 119  | 8.00E-27  | COG1959 |   | K  |  |  |
| ZMO0423 | 423539 | 425011 | 2  | 1473 | ZP_0009649           | ABC-type transport system invol    | 797  | 0         | COG0719 |   | O  |  |  |
| ZMO0424 | 425035 | 425184 | 1  | 150  | NP_904582            | ABC transporter, ATP-binding pr    | 73.9 | 7.00E-13  | COG0396 |   | O  |  |  |
| ZMO0425 | 425168 | 425779 | 2  | 612  | ZP_0009649           | ABC-type transport system invol    | 285  | 5.00E-76  | COG0396 |   | O  |  |  |
| ZMO0426 | 425776 | 426891 | 1  | 1116 | NP_947808            | ABC-type transport system invol    | 135  | 1.00E-30  | COG0719 |   | O  |  |  |
| ZMO0427 | 426888 | 428111 | 3  | 1224 | ZP_0009649           | selenocysteine lyase               | 505  | 1.00E-142 | COG0520 |   | E  |  |  |
| ZMO0428 | 428108 | 428542 | 2  | 435  | ZP_0009650           | metal-sulfur cluster biosynthetic  | 151  | 2.00E-36  | COG2151 |   | R  |  |  |
| ZMO0429 | 428581 | 428922 | 1  | 342  | ZP_0009650           | conserved hypothetical protein     | 147  | 5.00E-35  | COG0316 |   | S  |  |  |
| ZMO0430 | 429047 | 429715 | 2  | 669  | ZP_0005422           | predicted hydrolase (HAD superf    | 177  | 1.00E-43  | COG1011 |   | R  |  |  |
| ZMO0431 | 429749 | 430579 | 2  | 831  | ZP_0009342           | tetrahydrodipicolinate N-succinyl  | 399  | 1.00E-110 | COG2171 |   | E  |  |  |
| ZMO0432 | 431522 | 430650 | -3 | 873  | ZP_0012405           | arginase/agmatinase/formimiono     | 327  | 1.00E-88  | COG0010 |   | E  |  |  |
| ZMO0433 | 432514 | 431870 | -2 | 645  | ZP_0009593           | guanylate kinase                   | 272  | 3.00E-72  | COG0194 |   | F  |  |  |
| ZMO0434 | 432696 | 432559 | -1 | 138  | hypothetical protein |                                    |      |           |         |   |    |  |  |
| ZMO0435 | 433075 | 432674 | -2 | 402  | ZP_0009388           | conserved hypothetical protein     | 105  | 3.00E-22  | -       |   | -  |  |  |
| ZMO0436 | 433638 | 433246 | -1 | 393  | NP_539060            | conserved hypothetical membrar     | 100  | 5.00E-21  | COG3686 |   | S  |  |  |
| ZMO0437 | 433799 | 434020 | 2  | 222  | NP_644340            | conserved hypothetical protein     | 54.7 | 4.00E-07  | -       |   | -  |  |  |
| ZMO0438 | 434159 | 434278 | 2  | 120  | hypothetical protein |                                    |      |           |         |   |    |  |  |
| ZMO0439 | 434275 | 435399 | 1  | 1125 | ZP_0009311           | pseudouridylyl synthases, 23S      | 312  | 8.00E-84  | COG0564 |   | J  |  |  |
| ZMO0440 | 435509 | 435799 | 2  | 291  | hypothetical protein |                                    |      |           |         |   |    |  |  |
| ZMO0441 | 435826 | 436530 | 1  | 705  | ZP_0000447           | chaperone required for the asser   | 209  | 5.00E-53  | COG5387 |   | O  |  |  |
| ZMO0442 | 436559 | 437203 | 2  | 645  | NP_863883            | phosphatase, putative              | 127  | 2.00E-28  | COG0637 |   | R  |  |  |
| ZMO0443 | 438321 | 437290 | -1 | 1032 | ZP_0009679           | ribonucleotide reductase, beta su  | 576  | 1.00E-163 | COG0208 |   | F  |  |  |
| ZMO0444 | 438653 | 439699 | 2  | 1047 | NP_903735            | conserved hypothetical protein     | 80.9 | 4.00E-14  | COG2845 |   | S  |  |  |
| ZMO0445 | 439696 | 441261 | 1  | 1566 | NP_927853            | conserved hypothetical protein     | 84   | 8.00E-15  | -       |   | -  |  |  |
| ZMO0446 | 441293 | 442699 | 2  | 1407 | NP_905383            | alginate O-acetyltransferase, put  | 363  | 6.00E-99  | COG1696 |   | M  |  |  |
| ZMO0447 | 442717 | 443028 | 1  | 312  | hypothetical protein |                                    |      |           |         |   |    |  |  |
| ZMO0448 | 443730 | 443047 | -1 | 684  | ZP_0009603           | cell wall hydrolyses involved in s | 78.2 | 1.00E-13  | COG3773 |   | M  |  |  |
| ZMO0449 | 444524 | 445291 | 2  | 768  | ZP_0009389           | conserved hypothetical protein     | 100  | 3.00E-20  | COG4649 |   | S  |  |  |
| ZMO0450 | 445314 | 446558 | 3  | 1245 | ZP_0009389           | FOG: WD40-like repeat (PQQ er      | 319  | 8.00E-86  | COG1520 |   | S  |  |  |
| ZMO0451 | 446644 | 446540 | -2 | 105  | hypothetical protein |                                    |      |           |         |   |    |  |  |
| ZMO0452 | 446661 | 446798 | 3  | 138  | hypothetical protein |                                    |      |           |         |   |    |  |  |
| ZMO0453 | 446865 | 448229 | 3  | 1365 | ZP_0009624           | GTPases, predicted                 | 610  | 1.00E-173 | COG1160 |   | R  |  |  |
| ZMO0454 | 449968 | 449330 | -3 | 639  | NP_386496            | formate-tetrahydrofolate ligase    | 429  | 1.00E-119 | COG2759 |   | F  |  |  |
| ZMO0455 | 450261 | 450157 | -1 | 105  | hypothetical protein |                                    |      |           |         |   |    |  |  |
| ZMO0456 | 450398 | 450715 | 2  | 318  | NP_640666            | vanillate O-demethylase oxidore    | 110  | 6.00E-24  | COG1018 |   | C  |  |  |
| ZMO0457 | 450841 | 451335 | 1  | 495  | P74996 GRP           | glutamate uptake regulatory prot   | 295  | 2.00E-79  | COG1522 |   | K  |  |  |
| ZMO0458 | 452027 | 451335 | -3 | 693  | NP_697838            | lipoprotein releasing system ATP   | 238  | 7.00E-62  | COG1136 |   | V  |  |  |
| ZMO0459 | 453270 | 452026 | -1 | 1245 | ZP_0009345           | ABC-type transport system, invol   | 503  | 1.00E-141 | COG4591 |   | M  |  |  |
| ZMO0460 | 454602 | 453475 | -1 | 1128 | NP_420738            | prolyl-tRNA synthetase (proline--  | 498  | 1.00E-140 | COG0442 |   | J  |  |  |

|         |        |        |    |      |                      |                                   |      |           |         |      |   |
|---------|--------|--------|----|------|----------------------|-----------------------------------|------|-----------|---------|------|---|
| ZMO0461 | 454718 | 454575 | -3 | 144  | hypothetical protein |                                   |      | -         | -       |      |   |
| ZMO0462 | 456723 | 455095 | -1 | 1629 | NP_539766            | CTP synthase                      | 794  | 0         | COG0504 | F    |   |
| ZMO0463 | 456735 | 456881 | 3  | 147  | hypothetical protein |                                   |      | -         | -       | -    |   |
| ZMO0464 | 457290 | 456868 | -1 | 423  | ZP_00095111          | preprotein translocase subunit S  | 100  | 5.00E-21  | COG1314 | U    |   |
| ZMO0465 | 458219 | 457476 | -3 | 744  | ZP_00006314          | triosephosphate isomerase         | 227  | 1.00E-58  | COG0149 | G    |   |
| ZMO0466 | 458401 | 458282 | -2 | 120  | hypothetical protein |                                   |      | -         | -       | -    |   |
| ZMO0467 | 458508 | 460466 | 3  | 1959 | ZP_00095111          | peptidyl-prolyl isomerase         | 305  | 2.00E-81  | COG0760 | O    |   |
| ZMO0468 | 460463 | 462013 | 2  | 1551 | ZP_00095114          | anthranilate/para-aminobenzoate   | 639  | 0         | COG0147 | EH   |   |
| ZMO0469 | 462480 | 462055 | -1 | 426  | hypothetical protein |                                   |      | -         | -       | -    |   |
| ZMO0470 | 462735 | 462595 | -1 | 141  | hypothetical protein |                                   |      | -         | -       | -    |   |
| ZMO0471 | 462737 | 463696 | 2  | 960  | ZP_00033891          | transcriptional regulator         | 342  | 8.00E-93  | COG0583 | K    |   |
| ZMO0472 | 464412 | 463738 | -1 | 675  | ZP_00096411          | conserved hypothetical protein    | 184  | 1.00E-45  | COG5590 | S    |   |
| ZMO0473 | 465041 | 464628 | -3 | 414  | ZP_00094031          | riboflavin synthase beta-chain    | 209  | 1.00E-53  | COG0054 | H    |   |
| ZMO0474 | 466182 | 465049 | -1 | 1134 | ZP_00095221          | GTP cyclohydrolase II             | 441  | 1.00E-122 | COG0108 | H    |   |
| ZMO0475 | 466799 | 466185 | -3 | 615  | ZP_00096401          | riboflavin synthase alpha chain   | 228  | 4.00E-59  | COG0307 | H    |   |
| ZMO0476 | 467859 | 466894 | -1 | 966  | ZP_00096401          | riboflavin-specific deaminase/rec | 320  | 3.00E-86  | COG0117 | H    |   |
| ZMO0477 | 468240 | 467896 | -1 | 345  | hypothetical protein |                                   |      | -         | -       | -    |   |
| ZMO0478 | 468425 | 469144 | 2  | 720  | ZP_00029851          | response regulators consisting o  | 229  | 5.00E-59  | COG0745 | TK   |   |
| ZMO0479 | 469148 | 470500 | 2  | 1353 | NP_422120            | peptidoglycan binding domain pr   | 167  | 6.00E-40  | COG4254 | S    |   |
| ZMO0480 | 470493 | 472784 | 3  | 2292 | NP_422121            | two-component sensory box hist    | 391  | 1.00E-107 | COG4252 | T    |   |
| ZMO0481 | 473325 | 472750 | -1 | 576  | hypothetical protein |                                   |      | -         | -       | -    |   |
| ZMO0482 | 474335 | 473343 | -3 | 993  | ZP_00006121          | fructose-1,6-bisphosphatase/sed   | 336  | 3.00E-91  | COG1494 | G    |   |
| ZMO0483 | 475749 | 474463 | -1 | 1287 | ZP_00096661          | homoserine dehydrogenase          | 454  | 1.00E-126 | COG0460 | E    |   |
| ZMO0484 | 475910 | 476620 | 2  | 711  | NP_946216            | magnesium transport MgtC, prec    | 187  | 1.00E-46  | COG1285 | S    |   |
| ZMO0485 | 476871 | 478049 | 3  | 1179 | NP_946958            | acyl-CoA dehydrogenase            | 591  | 1.00E-168 | COG1960 | I    |   |
| ZMO0486 | 478113 | 478988 | 3  | 876  | NP_699369            | conserved hypothetical protein    | 288  | 7.00E-77  | COG3777 | S    |   |
| ZMO0487 | 478981 | 479793 | 1  | 813  | NP_542052            | citrate lyase beta chain          | 300  | 2.00E-80  | COG2301 | G    |   |
| ZMO0488 | 480912 | 479914 | -1 | 999  | NP_102733            | GTP binding protein, probable     | 70.5 | 5.00E-11  | -       | -    | - |
| ZMO0489 | 481247 | 481477 | 2  | 231  | hypothetical protein |                                   |      | -         | -       | -    |   |
| ZMO0490 | 483547 | 481487 | -2 | 2061 | ZP_00096531          | protease II                       | 756  | 0         | COG1770 | E    |   |
| ZMO0491 | 483675 | 485474 | 3  | 1800 | ZP_00096531          | aminopeptidase P (Xaa-pro)        | 676  | 0         | COG0006 | E    |   |
| ZMO0492 | 485584 | 485946 | 1  | 363  | ZP_00056441          | nitrogen regulatory protein PII   | 166  | 8.00E-41  | COG0347 | E    |   |
| ZMO0493 | 486040 | 487452 | 1  | 1413 | ZP_00094351          | glutamine synthetase              | 781  | 0         | COG0174 | E    |   |
| ZMO0494 | 487648 | 488898 | 1  | 1251 | NP_772234            | MFS permease                      | 303  | 6.00E-81  | COG0477 | GEPR |   |
| ZMO0495 | 493166 | 488895 | -3 | 4272 | ZP_00094351          | conserved hypothetical protein    | 669  | 0         | COG2911 | S    |   |
| ZMO0496 | 495058 | 493172 | -2 | 1887 | NP_103198            | conserved hypothetical protein    | 208  | 4.00E-52  | COG0729 | M    |   |
| ZMO0497 | 495939 | 495244 | -1 | 696  | ZP_00093821          | phosphatases, predicted           | 169  | 5.00E-41  | COG0546 | R    |   |
| ZMO0498 | 496114 | 497499 | 1  | 1386 | ZP_00093821          | N-acetylglucosamine-1-phospha     | 525  | 1.00E-148 | COG1207 | M    |   |
| ZMO0499 | 499786 | 497684 | -2 | 2103 | ZP_00096681          | membrane carboxypeptidase (pe     | 724  | 0         | COG0744 | M    |   |
| ZMO0500 | 501757 | 499823 | -2 | 1935 | NP_105540            | conserved hypothetical protein    | 200  | 7.00E-50  | -       | -    | - |
| ZMO0501 | 502012 | 502464 | 1  | 453  | ZP_00025731          | conserved hypothetical membrar    | 60.1 | 7.00E-09  | COG2246 | S    |   |
| ZMO0502 | 504134 | 502479 | -3 | 1656 | ZP_00096721          | conserved hypothetical protein    | 193  | 7.00E-48  | -       | -    | - |
| ZMO0503 | 504300 | 505469 | 3  | 1170 | NP_949121            | dolichol-phosphate mannosyltr     | 315  | 1.00E-84  | COG0463 | M    |   |
| ZMO0504 | 505552 | 505355 | -2 | 198  | hypothetical protein |                                   |      | -         | -       | -    |   |
| ZMO0505 | 505576 | 506235 | 1  | 660  | ZP_00096521          | pseudouridylyl synthases, 23S     | 225  | 6.00E-58  | COG0564 | J    |   |
| ZMO0506 | 506901 | 506488 | -1 | 414  | ZP_00083731          | protein chain release factor B    | 134  | 3.00E-31  | COG1186 | J    |   |
| ZMO0507 | 507018 | 507503 | 3  | 486  | ZP_00096431          | GAF domain-containing protein     | 172  | 2.00E-42  | COG1956 | T    |   |
| ZMO0508 | 507527 | 507958 | 2  | 432  | CAE77991             | acetyltransferase                 | 94   | 5.00E-19  | COG0454 | KR   |   |
| ZMO0509 | 508043 | 508762 | 2  | 720  | CAA63807             | conserved hypothetical protein    | 516  | 1.00E-145 | -       | -    | - |
| ZMO0510 | 509042 | 510364 | 2  | 1323 | O66119 ODP           | dihydrolipoamide acetyltransfera  | 826  | 0         | COG0508 | C    |   |
| ZMO0511 | 510361 | 510810 | 1  | 450  | ZP_00051841          | acyl-CoA hydrolase                | 139  | 7.00E-33  | COG1607 | I    |   |
| ZMO0512 | 510856 | 512256 | 1  | 1401 | P50970 DLDI          | dihydrolipoyl dehydrogenase (E3   | 912  | 0         | COG1249 | C    |   |
| ZMO0513 | 512268 | 512975 | 3  | 708  | NP_105411            | conserved hypothetical protein, f | 102  | 8.00E-21  | COG0671 | I    |   |
| ZMO0514 | 513761 | 514231 | 2  | 471  | ZP_00094601          | ribosomal protein S7              | 251  | 3.00E-66  | COG0049 | J    |   |
| ZMO0515 | 514290 | 516362 | 3  | 2073 | ZP_00094611          | translation elongation factors (G | 1139 | 0         | COG0480 | J    |   |
| ZMO0516 | 516466 | 517659 | 1  | 1194 | ZP_00094611          | GTPases - translation elongation  | 697  | 0         | COG0050 | J    |   |
| ZMO0517 | 518391 | 519119 | 3  | 729  | ZP_00094611          | ribosomal protein L3              | 367  | 1.00E-100 | COG0087 | J    |   |
| ZMO0518 | 519122 | 519745 | 2  | 624  | ZP_00094611          | ribosomal protein L4              | 302  | 3.00E-81  | COG0088 | J    |   |
| ZMO0519 | 519738 | 520049 | 3  | 312  | ZP_00094611          | ribosomal protein L23             | 141  | 3.00E-33  | COG0089 | J    |   |
| ZMO0520 | 520054 | 520890 | 1  | 837  | ZP_00094611          | ribosomal protein L2              | 494  | 1.00E-139 | COG0090 | J    |   |
| ZMO0521 | 521168 | 521548 | 2  | 381  | ZP_00094611          | ribosomal protein L22             | 195  | 2.00E-49  | COG0091 | J    |   |
| ZMO0522 | 521550 | 522245 | 3  | 696  | ZP_00094611          | ribosomal protein S3              | 403  | 1.00E-111 | COG0092 | J    |   |
| ZMO0523 | 522309 | 522740 | 3  | 432  | ZP_00094621          | ribosomal protein L16/L10E        | 235  | 1.00E-61  | COG0197 | J    |   |
| ZMO0524 | 522743 | 522946 | 2  | 204  | ZP_00094621          | ribosomal protein L29             | 101  | 4.00E-21  | COG0255 | J    |   |
| ZMO0525 | 522958 | 523209 | 1  | 252  | ZP_00094621          | ribosomal protein S17             | 130  | 6.00E-30  | COG0186 | J    |   |
| ZMO0526 | 523337 | 523648 | 2  | 312  | NP_948579            | ribosomal protein L14, 50S        | 159  | 1.00E-38  | COG0093 | J    |   |
| ZMO0527 | 523648 | 523965 | 1  | 318  | ZP_00094621          | ribosomal protein L24             | 145  | 2.00E-34  | COG0198 | J    |   |
| ZMO0528 | 523958 | 524536 | 2  | 579  | ZP_00094621          | ribosomal protein L5              | 306  | 1.00E-82  | COG0094 | J    |   |
| ZMO0529 | 524580 | 524885 | 3  | 306  | ZP_00094621          | ribosomal protein S14             | 175  | 1.00E-43  | COG0199 | J    |   |
| ZMO0530 | 524899 | 525294 | 1  | 396  | ZP_00094621          | ribosomal protein S8              | 210  | 4.00E-54  | COG0096 | J    |   |
| ZMO0531 | 525294 | 525827 | 3  | 534  | ZP_00094621          | ribosomal protein L6P/L9E         | 283  | 1.00E-75  | COG0097 | J    |   |
| ZMO0532 | 525827 | 526183 | 2  | 357  | ZP_00094621          | ribosomal protein L18             | 159  | 8.00E-39  | COG0256 | J    |   |
| ZMO0533 | 526184 | 526885 | 2  | 702  | ZP_00094631          | ribosomal protein S5              | 339  | 3.00E-92  | COG0098 | J    |   |
| ZMO0534 | 526893 | 527069 | 3  | 177  | ZP_00013701          | ribosomal protein L30/L7E         | 87.4 | 6.00E-17  | COG1841 | J    |   |
| ZMO0535 | 527193 | 527056 | -1 | 138  | hypothetical protein |                                   |      | -         | -       | -    |   |
| ZMO0536 | 527220 | 527711 | 3  | 492  | ZP_00094631          | ribosomal protein L15             | 229  | 2.00E-59  | COG0200 | J    |   |
| ZMO0537 | 527997 | 529385 | 3  | 1389 | NP_385482            | preprotein translocase, transmer  | 544  | 1.00E-153 | COG0201 | U    |   |

|         |        |        |    |      |            |                                                          |      |           |         |      |
|---------|--------|--------|----|------|------------|----------------------------------------------------------|------|-----------|---------|------|
| ZMO0538 | 529418 | 530089 | 2  | 672  | ZP_0009463 | adenylate kinase and related kin                         | 262  | 3.00E-69  | COG0563 | F    |
| ZMO0539 | 530403 | 530792 | 3  | 390  | ZP_0009596 | ribosomal protein S13                                    | 211  | 2.00E-54  | COG0099 | J    |
| ZMO0540 | 530857 | 531246 | 1  | 390  | ZP_0009596 | ribosomal protein S11                                    | 246  | 8.00E-65  | COG0100 | J    |
| ZMO0541 | 531339 | 532400 | 3  | 1062 | ZP_0009595 | DNA-directed RNA polymerase, $\sigma$                    | 557  | 1.00E-157 | COG0202 | K    |
| ZMO0542 | 532520 | 532942 | 2  | 423  | ZP_0009595 | ribosomal protein L17                                    | 210  | 4.00E-54  | COG0203 | J    |
| ZMO0543 | 533710 | 535980 | 1  | 2271 | NP_810985  | aconitate hydratase                                      | 1073 | 0         | COG1048 | C    |
| ZMO0544 | 536046 | 537308 | 3  | 1263 | NP_810984  | isocitrate dehydrogenase [NADP                           | 562  | 1.00E-159 | COG0538 | C    |
| ZMO0545 | 538208 | 537420 | -3 | 789  | Q9XBM3 TRF | indole-3-glycerol phosphate synt                         | 506  | 1.00E-142 | COG0134 | E    |
| ZMO0546 | 538609 | 540051 | 1  | 1443 | NP_638866  | sulfate permease                                         | 577  | 1.00E-163 | COG0659 | P    |
| ZMO0547 | 542067 | 540559 | -1 | 1509 | NP_561506  | conserved hypothetical protein                           | 343  | 7.00E-93  | COG0038 | P    |
| ZMO0548 | 543223 | 542216 | -2 | 1008 | ZP_0000449 | two-component signal transducti                          | 152  | 1.00E-35  | COG3920 | T    |
| ZMO0549 | 545622 | 543382 | -1 | 2241 | ZP_0009477 | polyribonucleotide nucleotidyltra                        | 1062 | 0         | COG1185 | J    |
| ZMO0550 | 546005 | 545742 | -3 | 264  | NP_540879  | ribosomal protein S15P, SSU                              | 136  | 1.00E-31  | COG0184 | J    |
| ZMO0551 | 546934 | 546029 | -2 | 906  | ZP_0009476 | tRNA pseudouridine synthase                              | 321  | 1.00E-86  | COG0130 | J    |
| ZMO0552 | 547512 | 546937 | -1 | 576  | ZP_0009476 | thymidine kinase, zeocin resistar                        | 255  | 4.00E-67  | COG1435 | F    |
| ZMO0553 | 547961 | 547542 | -3 | 420  | ZP_0009476 | ribosome-binding factor A                                | 139  | 1.00E-32  | COG0858 | J    |
| ZMO0554 | 551077 | 548114 | -2 | 2964 | ZP_0009476 | translation initiation factor 2 (IF-2                    | 983  | 0         | COG0532 | J    |
| ZMO0555 | 551815 | 551087 | -2 | 729  | ZP_0009476 | transcription termination involvec                       | 184  | 1.00E-45  | COG2740 | K    |
| ZMO0556 | 553507 | 551888 | -2 | 1620 | NP_767425  | N-utilization substance protein A                        | 629  | 1.00E-179 | COG0195 | K    |
| ZMO0557 | 554058 | 553510 | -1 | 549  | ZP_0009690 | conserved hypothetical protein                           | 168  | 4.00E-41  | COG0779 | S    |
| ZMO0558 | 554462 | 555790 | 2  | 1329 | NP_644174  | dehydrogenase                                            | 315  | 2.00E-84  | COG2133 | G    |
| ZMO0559 | 555866 | 556693 | 2  | 828  | ZP_0009642 | ATPase (AAA+ superfamily), pre                           | 236  | 5.00E-61  | COG2607 | R    |
| ZMO0560 | 556860 | 558008 | 3  | 1149 | NP_419887  | histidinol-phosphate aminotransf                         | 277  | 2.00E-73  | COG0079 | E    |
| ZMO0561 | 560558 | 559101 | -3 | 1458 | ZP_0002744 | outer membrane receptor proteir                          | 396  | 1.00E-109 | COG1629 | P    |
| ZMO0562 | 560726 | 561883 | 2  | 1158 | NP_419887  | histidinol-phosphate aminotransf                         | 275  | 2.00E-72  | COG0079 | E    |
| ZMO0563 | 562325 | 562029 | -3 | 297  | NP_387347  | putative chorismate mutase prot                          | 97.8 | 4.00E-20  | COG1605 | E    |
| ZMO0564 | 562444 | 563457 | 1  | 1014 | ZP_0009466 | geranylgeranyl pyrophosphate sy                          | 393  | 1.00E-108 | COG0142 | H    |
| ZMO0565 | 563499 | 566012 | 3  | 2514 | ZP_0009465 | helicases, HrpA-like, ATP-depen                          | 724  | 0         | COG1643 | L    |
| ZMO0566 | 567455 | 566208 | -3 | 1248 | NP_640673  | MFS transporter                                          | 373  | 1.00E-102 | COG0477 | GEPR |
| ZMO0567 | 568602 | 567682 | -1 | 921  | ZP_0009369 | succinyl-CoA synthetase, alpha s                         | 437  | 1.00E-121 | COG0074 | C    |
| ZMO0568 | 569042 | 568665 | -3 | 378  | ZP_0009316 | succinate dehydrogenase, hydro                           | 53.5 | 7.00E-07  | -       | -    |
| ZMO0569 | 569470 | 569051 | -2 | 420  | ZP_0009316 | succinate dehydrogenase/fumar                            | 57   | 6.00E-08  | -       | -    |
| ZMO0570 | 569630 | 570577 | 2  | 948  | ZP_0009316 | ribosomal protein L11 methylase                          | 261  | 2.00E-68  | COG2264 | J    |
| ZMO0571 | 571449 | 573218 | 3  | 1770 | ZP_0010345 | ABC-type anion transport system                          | 742  | 0         | COG4986 | P    |
| ZMO0572 | 573245 | 574564 | 2  | 1320 | ZP_0004000 | ABC-type nitrate/sulfonate/bicart                        | 598  | 1.00E-169 | COG3842 | E    |
| ZMO0573 | 574746 | 575393 | 3  | 648  | NP_455658  | glutaredoxin 2                                           | 211  | 8.00E-54  | COG2999 | O    |
| ZMO0574 | 577749 | 575449 | -1 | 2301 | ZP_0009469 | DNA and RNA helicases                                    | 906  | 0         | COG0210 | L    |
| ZMO0575 | 578364 | 577819 | -1 | 546  | ZP_0009470 | N6-adenine-specific methylase                            | 191  | 5.00E-48  | COG0742 | L    |
| ZMO0576 | 579395 | 578997 | -2 | 399  | ZP_0009470 | 16S rRNA uridine-516 pseudouri                           | 258  | 5.00E-68  | COG1187 | J    |
| ZMO0577 | 579778 | 579981 | 1  | 204  |            | hypothetical protein                                     | -    | -         | -       | -    |
| ZMO0578 | 581333 | 580059 | -3 | 1275 | ZP_0002477 | Na <sup>+</sup> /H <sup>+</sup> -dicarboxylate symporter | 433  | 1.00E-120 | COG1301 | C    |
| ZMO0579 | 581479 | 581661 | 1  | 183  |            | hypothetical protein                                     | -    | -         | -       | -    |
| ZMO0580 | 581696 | 581541 | -3 | 156  |            | hypothetical protein                                     | -    | -         | -       | -    |
| ZMO0581 | 581710 | 583014 | 1  | 1305 | ZP_0009470 | permeases of the major facilitato                        | 375  | 1.00E-102 | COG0477 | GEPR |
| ZMO0582 | 584363 | 583038 | -3 | 1326 | NP_945428  | putative poly(oligo)glutamate synth                      | 336  | 7.00E-91  | COG0285 | H    |
| ZMO0583 | 585246 | 584398 | -1 | 849  | ZP_0009470 | acetyl-CoA carboxylase beta sub                          | 400  | 1.00E-110 | COG0777 | I    |
| ZMO0584 | 586067 | 585249 | -3 | 819  | P34816 TRP | tryptophan synthase alpha chain                          | 263  | 2.00E-69  | COG0159 | E    |
| ZMO0585 | 587290 | 586070 | -2 | 1221 | P56929 TRP | tryptophan synthase beta chain                           | 592  | 1.00E-168 | COG0133 | E    |
| ZMO0586 | 587922 | 587293 | -1 | 630  | Q9S3U4 TRF | N-(5'-phosphoribosyl)anthranilate                        | 415  | 1.00E-115 | COG0135 | E    |
| ZMO0587 | 588745 | 588041 | -2 | 705  | ZP_0009471 | orotidine-5'-phosphate decarbox                          | 259  | 4.00E-68  | COG0284 | F    |
| ZMO0588 | 589073 | 588765 | -3 | 309  | ZP_0009471 | conserved hypothetical protein                           | 52.8 | 1.00E-06  | -       | -    |
| ZMO0589 | 589166 | 590533 | 2  | 1368 | ZP_0009549 | ATP-dependent serine protease,                           | 603  | 1.00E-171 | COG1066 | O    |
| ZMO0590 | 590533 | 591258 | 1  | 726  | ZP_0009548 | uncharacterized membrane prot                            | 74.7 | 2.00E-12  | COG1286 | R    |
| ZMO0591 | 591473 | 591922 | 2  | 450  | ZP_0000783 | NifU homolog involved in Fe-S cl                         | 89   | 1.00E-17  | COG0822 | C    |
| ZMO0592 | 591952 | 592326 | 1  | 375  | NP_439229  | conserved hypothetical protein                           | 79.7 | 1.00E-14  | COG2363 | S    |
| ZMO0593 | 593505 | 592372 | -1 | 1134 | ZP_0009453 | 3-dehydroquinase synthetase                              | 433  | 1.00E-120 | COG0337 | E    |
| ZMO0594 | 594032 | 593508 | -3 | 525  | NP_421802  | shikimate kinase                                         | 176  | 2.00E-43  | COG0703 | E    |
| ZMO0595 | 594116 | 594265 | 2  | 150  |            | hypothetical protein                                     | -    | -         | -       | -    |
| ZMO0596 | 594307 | 594155 | -2 | 153  |            | hypothetical protein                                     | -    | -         | -       | -    |
| ZMO0597 | 594369 | 596009 | 3  | 1641 | ZP_0009453 | conserved hypothetical protein                           | 245  | 2.00E-63  | -       | -    |
| ZMO0598 | 596051 | 596974 | 2  | 924  | NP_421800  | integrase/recombinase XerD                               | 241  | 2.00E-62  | COG4974 | L    |
| ZMO0599 | 596985 | 597926 | 3  | 942  | ZP_0009453 | acetyl-CoA carboxylase alpha su                          | 424  | 1.00E-117 | COG0825 | I    |
| ZMO0600 | 598197 | 598033 | -1 | 165  |            | hypothetical protein                                     | -    | -         | -       | -    |
| ZMO0601 | 598187 | 600622 | 2  | 2436 | AAP46184   | two component sensor kinase/re                           | 662  | 0         | COG0642 | T    |
| ZMO0602 | 602653 | 601679 | -2 | 975  | ZP_0003214 | flagellar motor protein, MotB                            | 193  | 4.00E-48  | COG1360 | N    |
| ZMO0603 | 603568 | 602711 | -2 | 858  | NP_419567  | flagellar motor component, chem                          | 264  | 2.00E-69  | COG1291 | N    |
| ZMO0604 | 604628 | 603777 | -3 | 852  | NP_455677  | flagellar hook-associated protein                        | 94.7 | 2.00E-18  | COG1344 | N    |
| ZMO0605 | 606019 | 604649 | -2 | 1371 | AAG31286   | flagellar hook-associated protein                        | 149  | 2.00E-34  | COG1256 | N    |
| ZMO0606 | 606572 | 606186 | -3 | 387  | NP_746496  | peptidoglycan hydrolase FlgJ                             | 55.1 | 3.00E-07  | COG3951 | MNO  |
| ZMO0607 | 607720 | 606575 | -2 | 1146 | Q9Z5T9 FLG | flagellar P-ring protein precursor                       | 686  | 0         | COG1706 | N    |
| ZMO0608 | 608409 | 607741 | -1 | 669  | Q9Z5T8 FLG | flagellar L-ring protein precursor                       | 415  | 1.00E-116 | COG2063 | N    |
| ZMO0609 | 609214 | 608429 | -2 | 786  | NP_791763  | flagellar basal-body rod protein F                       | 282  | 4.00E-75  | COG4786 | N    |
| ZMO0610 | 610016 | 609273 | -3 | 744  | NP_718799  | flagellar basal-body rod protein F                       | 174  | 1.00E-42  | COG4787 | N    |
| ZMO0611 | 611291 | 610062 | -3 | 1230 | NP_637314  | flagellar biosynthesis, hook prote                       | 209  | 1.00E-52  | COG1749 | N    |
| ZMO0612 | 612024 | 611338 | -1 | 687  | AAF14369   | flagellar scaffolding protein FlgD                       | 115  | 9.00E-25  | COG1843 | N    |
| ZMO0613 | 612490 | 612092 | -2 | 399  | NP_642311  | flagellar biosynthesis cell-proxim                       | 121  | 2.00E-27  | COG1558 | N    |
| ZMO0614 | 612852 | 612505 | -1 | 348  | AAF14367   | flagellar proximal rod protein FlgI                      | 104  | 4.00E-22  | COG1815 | N    |



|         |        |        |    |                  |                                                 |      |           |         |     |
|---------|--------|--------|----|------------------|-------------------------------------------------|------|-----------|---------|-----|
| ZMO0615 | 612887 | 613090 | 2  | 204              | hypothetical protein                            |      |           | -       | -   |
| ZMO0616 | 613068 | 613763 | 3  | 696 NP_759315    | flagellar motor component MotA                  | 102  | 6.00E-21  | COG1291 | N   |
| ZMO0617 | 613820 | 614425 | 2  | 606 NP_901484    | chemotaxis motB protein                         | 52.8 | 5.00E-06  | COG1360 | N   |
| ZMO0618 | 614621 | 614779 | 2  | 159              | hypothetical protein                            |      |           | -       | -   |
| ZMO0619 | 614991 | 615557 | 3  | 567 NP_797151    | flagellar FlgA, polar                           | 55.1 | 7.00E-07  | -       | -   |
| ZMO0620 | 615923 | 615624 | -3 | 300              | hypothetical protein                            |      |           | -       | -   |
| ZMO0621 | 615649 | 616083 | 1  | 435 AAL13053     | platelet binding protein GspB (ce               | 65.1 | 2.00E-10  | -       | -   |
| ZMO0622 | 616076 | 616393 | 2  | 318              | hypothetical protein                            |      |           | -       | -   |
| ZMO0623 | 616667 | 616807 | 2  | 141              | hypothetical protein                            |      |           | -       | -   |
| ZMO0624 | 616807 | 618930 | 1  | 2124 NP_231701   | flagellar biosynthetic protein FlhA             | 624  | 1.00E-177 | COG1298 | NU  |
| ZMO0625 | 618931 | 619752 | 1  | 822 NP_791801    | flagellar synthesis regulator FleN              | 191  | 1.00E-47  | COG0455 | D   |
| ZMO0626 | 619742 | 620485 | 2  | 744 NP_798611    | flagellar-specific RNA polymerase               | 162  | 4.00E-39  | COG1191 | R   |
| ZMO0627 | 620618 | 621304 | 2  | 687              | hypothetical protein                            |      |           | COG1216 | K   |
| ZMO0628 | 621363 | 621989 | 3  | 627              | hypothetical protein                            |      |           | -       | -   |
| ZMO0629 | 622931 | 622083 | -3 | 849 ZP_00094271  | flagellin and related hook-associated           | 279  | 4.00E-74  | COG1344 | N   |
| ZMO0630 | 623618 | 624001 | 2  | 384              | hypothetical protein                            |      |           | -       | -   |
| ZMO0631 | 624040 | 624942 | 1  | 903 NP_746485    | two component response regulator                | 278  | 1.00E-73  | COG2204 | T   |
| ZMO0632 | 625049 | 625390 | 2  | 342 NP_798629    | flagellar hook-basal body complex               | 66.6 | 9.00E-11  | COG1677 | NU  |
| ZMO0633 | 625394 | 627049 | 2  | 1656 Q53151 FLIF | flagellar M-Ring protein; FliF                  | 279  | 1.00E-73  | COG1766 | NU  |
| ZMO0634 | 627114 | 627254 | 3  | 141              | hypothetical protein                            |      |           | -       | -   |
| ZMO0635 | 627247 | 628281 | 1  | 1035 ZP_00006051 | flagellar motor switch protein                  | 281  | 1.00E-74  | COG1536 | N   |
| ZMO0636 | 628268 | 629035 | 2  | 768 ZP_00084951  | flagellar biosynthesis/type III secretion       | 53.5 | 4.00E-06  | -       | -   |
| ZMO0637 | 629032 | 629925 | 1  | 894 CAA65834     | flagellum-specific ATP synthase subunit         | 263  | 3.00E-69  | COG1157 | NU  |
| ZMO0638 | 630361 | 630786 | 1  | 426              | hypothetical protein                            |      |           | -       | -   |
| ZMO0639 | 630783 | 631331 | 3  | 549 NP_870028    | conserved hypothetical protein-s                | 52   | 6.00E-06  | -       | -   |
| ZMO0640 | 631386 | 632666 | 3  | 1281 NP_647392   | conserved hypothetical protein, s               | 77.4 | 5.00E-13  | -       | -   |
| ZMO0641 | 632782 | 633186 | 1  | 405 NP_531272    | chemotaxis MotD protein                         | 53.1 | 1.00E-06  | -       | -   |
| ZMO0642 | 633199 | 633768 | 1  | 570 ZP_00004601  | conserved hypothetical protein                  | 101  | 9.00E-21  | COG1580 | N   |
| ZMO0643 | 633765 | 634763 | 3  | 999 AAC32319     | flagellar switch protein; FliM                  | 150  | 5.00E-35  | COG1868 | N   |
| ZMO0644 | 634760 | 635071 | 2  | 312 ZP_00065091  | flagellar motor switch/type III secretion       | 95.1 | 3.00E-19  | COG1886 | NU  |
| ZMO0645 | 635064 | 635228 | 3  | 165              | hypothetical protein                            |      |           | -       | -   |
| ZMO0646 | 635068 | 635388 | 1  | 321 NP_791794    | flagellar protein FliO                          | 52.8 | 1.00E-06  | -       | -   |
| ZMO0647 | 635393 | 636343 | 2  | 951 NP_840547    | flagellar transport protein FljP                | 255  | 9.00E-67  | COG1338 | NU  |
| ZMO0648 | 636340 | 636615 | 1  | 276 NP_660435    | flagellar biosynthetic protein FliQ             | 81.6 | 3.00E-15  | COG1987 | NU  |
| ZMO0649 | 636629 | 637426 | 2  | 798 ZP_00089071  | flagellar biosynthesis pathway, c               | 162  | 8.00E-39  | COG1684 | NU  |
| ZMO0650 | 637416 | 638558 | 3  | 1143 NP_231751   | flagellar biosynthetic protein FlhE             | 226  | 8.00E-58  | COG1377 | NU  |
| ZMO0651 | 638660 | 640354 | 2  | 1695 NP_945994   | flagellar hook-associated protein               | 200  | 8.00E-50  | COG1345 | N   |
| ZMO0652 | 640395 | 640784 | 3  | 390 NP_521945    | flagellar protein FliS, probable                | 75.1 | 2.00E-13  | COG1516 | NUO |
| ZMO0653 | 641944 | 640880 | -2 | 1065 ZP_00029761 | permease, predicted                             | 249  | 5.00E-65  | COG0628 | R   |
| ZMO0654 | 645373 | 641999 | -2 | 3375 NP_845761   | glycosyl transferase, protein/poly              | 718  | 0         | COG1215 | M   |
| ZMO0655 | 645528 | 647108 | 3  | 1581 ZP_00110911 | adenosine deaminase                             | 323  | 4.00E-87  | COG1816 | F   |
| ZMO0656 | 647754 | 647239 | -1 | 516 NP_940382    | purine phosphoribosyltransferase                | 73.6 | 2.00E-12  | COG2236 | R   |
| ZMO0657 | 648860 | 647838 | -3 | 1023 ZP_00094391 | arginine/ornithine N-succinyltransferase        | 377  | 1.00E-103 | COG3138 | E   |
| ZMO0658 | 650011 | 648863 | -2 | 1149 ZP_00094391 | acetylornithine deacetylase/succinyltransferase | 387  | 1.00E-106 | COG0624 | E   |
| ZMO0659 | 650527 | 651072 | 1  | 546 NP_249834    | conserved hypothetical protein                  | 82   | 9.00E-15  | COG0560 | E   |
| ZMO0660 | 651304 | 653211 | 1  | 1908 ZP_00094901 | heat shock protein dnaK, hsp70,                 | 998  | 0         | COG0443 | O   |
| ZMO0661 | 653331 | 654458 | 3  | 1128 ZP_00094901 | heat shock protein DnaJ, molecular chaperone    | 485  | 1.00E-136 | COG0484 | O   |
| ZMO0662 | 655861 | 654572 | -2 | 1290 NP_101953   | adenylosuccinate lyase                          | 650  | 0         | COG0015 | F   |
| ZMO0663 | 656684 | 656007 | -3 | 678 ZP_00094711  | DNA repair proteins, RadC                       | 234  | 1.00E-60  | COG2003 | L   |
| ZMO0664 | 656842 | 659982 | 1  | 3141 ZP_00094711 | exoproteins involved in heme utilization        | 365  | 4.00E-99  | -       | -   |
| ZMO0665 | 660037 | 660237 | 1  | 201 ZP_00094721  | conserved hypothetical protein                  | 70.5 | 8.00E-12  | -       | -   |
| ZMO0666 | 660234 | 660632 | 3  | 399 ZP_00094721  | conserved hypothetical protein                  | 95.1 | 2.00E-19  | COG3784 | S   |
| ZMO0667 | 661242 | 662042 | 3  | 801 ZP_00094721  | ATP synthase A chain                            | 298  | 6.00E-80  | COG0356 | C   |
| ZMO0668 | 662078 | 662317 | 2  | 240 ZP_00094721  | ATP synthase C chain, archaeal/                 | 114  | 3.00E-25  | COG0636 | C   |
| ZMO0669 | 662439 | 662939 | 3  | 501 ZP_00094721  | ATP synthase B chain                            | 139  | 2.00E-32  | COG0711 | C   |
| ZMO0670 | 662953 | 663210 | 1  | 258              | hypothetical protein                            |      |           | -       | -   |
| ZMO0671 | 663245 | 663592 | 2  | 348 ZP_00094721  | ATP synthase, subunit b                         | 89.4 | 1.00E-17  | COG0711 | C   |
| ZMO0672 | 663747 | 665741 | 3  | 1995 ZP_00095031 | nuclease subunit of the excinuclease            | 728  | 0         | COG0322 | L   |
| ZMO0673 | 665783 | 666541 | 2  | 759 ZP_00054201  | recombinational DNA repair protein              | 122  | 7.00E-27  | COG1381 | L   |
| ZMO0674 | 666579 | 667103 | 3  | 525 ZP_00050361  | conserved hypothetical protein                  | 113  | 2.00E-24  | -       | -   |
| ZMO0675 | 667910 | 667107 | -3 | 804 ZP_00094791  | transcriptional regulator, LysR family          | 293  | 3.00E-78  | COG0583 | K   |
| ZMO0676 | 669185 | 667983 | -3 | 1203 ZP_00055521 | cystathionine beta-lyases/cystathionase         | 431  | 1.00E-119 | COG0626 | E   |
| ZMO0677 | 670301 | 669258 | -3 | 1044 Q845W3 LEL  | 3-isopropylmalate dehydrogenase                 | 432  | 1.00E-120 | COG0473 | CE  |
| ZMO0678 | 671057 | 670440 | -3 | 618 ZP_00034391  | nitroreductase                                  | 179  | 4.00E-44  | COG0778 | C   |
| ZMO0679 | 671150 | 671251 | 2  | 102              | hypothetical protein                            |      |           | -       | -   |
| ZMO0680 | 671414 | 672451 | 2  | 1038 NP_901426   | conserved hypothetical protein                  | 462  | 1.00E-129 | COG1518 | L   |
| ZMO0681 | 672448 | 674391 | 1  | 1944 NP_901425   | conserved hypothetical protein                  | 639  | 0         | COG1203 | R   |
| ZMO0682 | 675915 | 677234 | 3  | 1320 NP_901424   | conserved hypothetical protein                  | 296  | 5.00E-79  | -       | -   |
| ZMO0683 | 677276 | 678259 | 2  | 984 NP_901423    | conserved hypothetical protein                  | 262  | 7.00E-69  | -       | -   |
| ZMO0684 | 678308 | 679348 | 2  | 1041 NP_901422   | conserved hypothetical protein                  | 431  | 1.00E-119 | -       | -   |
| ZMO0685 | 679332 | 679919 | 3  | 588 NP_405996    | conserved hypothetical protein                  | 139  | 4.00E-32  | -       | -   |
| ZMO0686 | 680361 | 680783 | 3  | 423 ZP_00093711  | conserved hypothetical protein                  | 62.4 | 2.00E-09  | -       | -   |
| ZMO0687 | 682528 | 680873 | -2 | 1656 ZP_00079041 | acetolactate synthase, pyruvate-dependent       | 709  | 0         | COG0028 | EH  |
| ZMO0688 | 683098 | 682598 | -2 | 501 ZP_00070291  | permeases, predicted                            | 107  | 9.00E-23  | COG0679 | R   |
| ZMO0689 | 685049 | 683754 | -3 | 1296 1H6DJA      | glucose-fructose oxidoreductase                 | 864  | 0         | COG0673 | R   |
| ZMO0690 | 685597 | 685472 | -2 | 126              | hypothetical protein                            |      |           | -       | -   |
| ZMO0691 | 687017 | 685683 | -3 | 1335 ZP_00093711 | NAD(FAD)-utilizing enzyme possessing            | 558  | 1.00E-157 | COG1206 | J   |

|         |        |        |    |      |             |                                    |      |           |         |    |
|---------|--------|--------|----|------|-------------|------------------------------------|------|-----------|---------|----|
| ZMO0692 | 689843 | 687072 | -3 | 2772 | ZP_0009371  | type IIA topoisomerase (DNA gyr    | 1208 | 0         | COG0188 | L  |
| ZMO0693 | 690337 | 689918 | -2 | 420  | NP_767375   | organic hydroperoxide resistance   | 187  | 2.00E-47  | COG1764 | O  |
| ZMO0694 | 691344 | 690625 | -1 | 720  |             | hypothetical protein               |      |           | -       | -  |
| ZMO0695 | 695630 | 692061 | -3 | 3570 | NP_637005   | conserved hypothetical protein     | 622  | 1.00E-176 | COG1112 | L  |
| ZMO0696 | 695798 | 695697 | -3 | 102  |             | hypothetical protein               |      |           | -       | -  |
| ZMO0697 | 696419 | 696102 | -3 | 318  | NP_697794   | sugE protein:multi-drug resistant  | 133  | 8.00E-31  | COG2076 | P  |
| ZMO0698 | 696992 | 696492 | -3 | 501  |             | hypothetical protein               |      |           | -       | -  |
| ZMO0699 | 697132 | 697323 | 1  | 192  |             | hypothetical protein               |      |           | -       | -  |
| ZMO0700 | 698364 | 697333 | -1 | 1032 | ZP_0010248  | dipeptidyl aminopeptidases/acyl    | 216  | 6.00E-55  | COG1506 | E  |
| ZMO0701 | 699476 | 699330 | -3 | 147  |             | hypothetical protein               |      |           | -       | -  |
| ZMO0702 | 699638 | 699513 | -3 | 126  |             | hypothetical protein               |      |           | -       | -  |
| ZMO0703 | 699343 | 698225 | -2 | 1119 | NP_874138   | colicin tolerance protein          | 55.1 | 2.00E-06  | -       | -  |
| ZMO0704 | 701431 | 699983 | -2 | 1449 | ZP_0009628  | acyl-CoA synthetases (AMP-form     | 602  | 1.00E-174 | COG0318 | IQ |
| ZMO0705 | 701467 | 702075 | 1  | 609  | ZP_0009628  | conserved hypothetical protein     | 107  | 1.00E-22  | -       | -  |
| ZMO0706 | 702728 | 702087 | -3 | 642  | ZP_0001405  | endonuclease III, predicted        | 270  | 1.00E-71  | COG0177 | L  |
| ZMO0707 | 703489 | 702731 | -2 | 759  | ZP_0009667  | dihydrodipicolinate reductase      | 260  | 2.00E-68  | COG0289 | E  |
| ZMO0708 | 704120 | 703500 | -3 | 621  | ZP_0005370  | folate-dependent phosphoribosyl    | 210  | 1.00E-53  | COG0299 | F  |
| ZMO0709 | 705213 | 704119 | -1 | 1095 | ZP_0009438  | phosphoribosylaminoimidazole (     | 514  | 1.00E-144 | COG0150 | F  |
| ZMO0710 | 705271 | 706368 | 1  | 1098 | ZP_0009438  | conserved hypothetical protein     | 227  | 3.00E-58  | -       | -  |
| ZMO0711 | 706372 | 707016 | 1  | 645  | ZP_0009438  | ATPase involved in DNA replicati   | 139  | 4.00E-32  | COG0593 | L  |
| ZMO0712 | 707198 | 709351 | 2  | 2154 | ZP_0001580  | polyphosphate kinase               | 828  | 0         | COG0855 | P  |
| ZMO0713 | 709518 | 711044 | 3  | 1527 | ZP_0001580  | exopolyphosphatase                 | 298  | 1.00E-79  | COG0248 | FP |
| ZMO0714 | 712291 | 711125 | -2 | 1167 | ZP_0009467  | ribonuclease D                     | 512  | 1.00E-144 | COG0349 | J  |
| ZMO0715 | 712396 | 714186 | 1  | 1791 | ZP_0001552  | aspartyl-tRNA synthetase           | 817  | 0         | COG0173 | J  |
| ZMO0716 | 714219 | 715004 | 3  | 786  | NP_617297   | conserved hypothetical protein     | 194  | 2.00E-48  | COG2326 | S  |
| ZMO0717 | 715077 | 714973 | -1 | 105  |             | hypothetical protein               |      |           | -       | -  |
| ZMO0718 | 715546 | 715055 | -2 | 492  | ZP_0009505  | transcription elongation factor    | 228  | 4.00E-59  | COG0782 | K  |
| ZMO0719 | 717714 | 715627 | -1 | 2088 | ZP_0009505  | transglycosylase and related reg   | 390  | 1.00E-107 | COG0741 | M  |
| ZMO0720 | 717739 | 718614 | 1  | 876  | ZP_0009505  | dihydrodipicolinate synthase/N-a   | 352  | 6.00E-96  | COG0329 | EM |
| ZMO0721 | 718618 | 719100 | 1  | 483  | AAP46182    | small protein B                    | 246  | 1.00E-64  | COG0691 | O  |
| ZMO0722 | 719295 | 721340 | 3  | 2046 | NP_639017   | metallopeptidase                   | 632  | 1.00E-180 | COG3590 | O  |
| ZMO0723 | 722321 | 721770 | -3 | 552  | ZP_0009627  | transcription antiterminator, NusC | 169  | 3.00E-41  | COG0250 | K  |
| ZMO0724 | 722013 | 722552 | 3  | 540  | ZP_0009627  | transcription antiterminator, NusC | 256  | 2.00E-67  | COG0250 | K  |
| ZMO0725 | 722639 | 723070 | 2  | 432  | ZP_0009627  | ribosomal protein L11              | 218  | 1.00E-56  | COG0080 | J  |
| ZMO0726 | 723075 | 723776 | 3  | 702  | NP_385451   | ribosomal protein L1               | 327  | 1.00E-88  | COG0081 | J  |
| ZMO0727 | 724041 | 724556 | 3  | 516  | ZP_0009664  | ribosomal protein L10              | 219  | 2.00E-56  | COG0244 | J  |
| ZMO0728 | 724614 | 724985 | 3  | 372  | ZP_0009664  | ribosomal protein L7/L12           | 186  | 8.00E-47  | COG0222 | J  |
| ZMO0729 | 724903 | 724556 | -2 | 348  | ZP_0009664  | ribosomal protein L7/L12           | 153  | 7.00E-37  | COG0222 | J  |
| ZMO0730 | 725416 | 725222 | -2 | 195  |             | hypothetical protein               |      |           | -       | -  |
| ZMO0731 | 725449 | 729654 | 1  | 4206 | ZP_0009665  | DNA-directed RNA polymerase, I     | 2280 | 0         | COG0085 | K  |
| ZMO0732 | 729737 | 733912 | 2  | 4176 | ZP_0009665  | DNA-directed RNA polymerase, I     | 2211 | 0         | COG0086 | K  |
| ZMO0733 | 734532 | 734044 | -1 | 489  | NP_888193   | acetyltransferase, putative        | 141  | 4.00E-33  | COG0454 | KR |
| ZMO0734 | 734709 | 735527 | 3  | 819  | NP_107864   | pssB protein, exopolysaccharide    | 212  | 6.00E-54  | COG1218 | P  |
| ZMO0735 | 736870 | 735590 | -2 | 1281 | ZP_0009493  | acetyl-CoA carboxylase, biotin ca  | 650  | 0         | COG0439 | I  |
| ZMO0736 | 737429 | 736953 | -3 | 477  | ZP_0009493  | acetyl-CoA carboxylase, biotin ca  | 165  | 3.00E-40  | COG0511 | I  |
| ZMO0737 | 737965 | 737531 | -2 | 435  | ZP_0009493  | 3-dehydroquinone dehydratase II    | 206  | 1.00E-52  | COG0757 | E  |
| ZMO0738 | 738047 | 739042 | 2  | 996  | ZP_0009672  | uncharacterized enzyme of thiaz    | 479  | 1.00E-134 | COG2022 | H  |
| ZMO0739 | 739402 | 739112 | -2 | 291  | NP_880694   | conserved hypothetical protein     | 80.5 | 7.00E-15  | COG2329 | R  |
| ZMO0740 | 739626 | 739898 | 3  | 273  | ZP_0008385  | conserved hypothetical protein     | 62.8 | 1.00E-09  | COG3237 | S  |
| ZMO0741 | 740077 | 739976 | -2 | 102  |             | hypothetical protein               |      |           | -       | -  |
| ZMO0742 | 740102 | 740218 | 2  | 117  |             | hypothetical protein               |      |           | -       | -  |
| ZMO0743 | 740230 | 741819 | 1  | 1590 | ZP_0009475  | peptide chain release factor RF-1  | 699  | 0         | COG4108 | J  |
| ZMO0744 | 741978 | 742778 | 3  | 801  | NP_641539   | conserved hypothetical protein     | 242  | 5.00E-63  | -       | -  |
| ZMO0745 | 742896 | 743369 | 3  | 474  | ZP_0014021  | conserved hypothetical protein     | 231  | 3.00E-60  | COG3558 | S  |
| ZMO0746 | 743990 | 744523 | 2  | 534  | ZP_0009572  | conserved hypothetical protein     | 115  | 3.00E-25  | COG3807 | S  |
| ZMO0747 | 744627 | 745046 | 3  | 420  | ZP_0009352  | conserved hypothetical protein     | 62.4 | 2.00E-09  | -       | -  |
| ZMO0748 | 746009 | 745092 | -3 | 918  | ZP_0009392  | cysteine synthase                  | 447  | 1.00E-124 | COG0031 | E  |
| ZMO0749 | 747127 | 746225 | -2 | 903  | P50512 RP3  | RNA polymerase sigma-32 facto      | 593  | 1.00E-168 | COG0568 | K  |
| ZMO0750 | 748133 | 747186 | -3 | 948  | P50513 RLUI | ribosomal large subunit pseudou    | 629  | 1.00E-179 | COG0564 | J  |
| ZMO0751 | 748181 | 748636 | 2  | 456  | ZP_0009333  | metal-dependent protease, predi    | 85.9 | 1.00E-16  | COG1310 | R  |
| ZMO0752 | 748754 | 749380 | 2  | 627  | ZP_0009333  | conserved hypothetical protein     | 200  | 2.00E-50  | COG5385 | S  |
| ZMO0753 | 749552 | 749806 | 2  | 255  | NP_290193   | glutaredoxin 3                     | 114  | 6.00E-25  | COG0695 | O  |
| ZMO0754 | 749844 | 750146 | 3  | 303  | NP_104186   | conserved hypothetical protein     | 69.7 | 1.00E-11  | COG3255 | I  |
| ZMO0755 | 751249 | 750224 | -2 | 1026 | NP_634744   | conserved hypothetical protein     | 74.3 | 3.00E-12  | COG0457 | R  |
| ZMO0756 | 751640 | 751230 | -3 | 411  |             | hypothetical protein               |      |           | -       | -  |
| ZMO0757 | 752881 | 751757 | -2 | 1125 | NP_617725   | conserved hypothetical protein     | 60.1 | 8.00E-08  | COG0457 | R  |
| ZMO0758 | 753515 | 752871 | -3 | 645  | NP_822563   | isochorismatase, putative          | 204  | 1.00E-51  | COG1335 | Q  |
| ZMO0759 | 754278 | 753559 | -1 | 720  | ZP_0001493  | Zn-dependent hydrolases, includ    | 247  | 2.00E-64  | COG0491 | R  |
| ZMO0760 | 754714 | 754325 | -2 | 390  | ZP_0009398  | lactoylglutathione lyase and relat | 171  | 2.00E-42  | COG0346 | E  |
| ZMO0761 | 754406 | 754819 | 2  | 414  | ZP_0009398  | lactoylglutathione lyase and relat | 146  | 8.00E-35  | COG0346 | E  |
| ZMO0762 | 754850 | 754698 | -3 | 153  |             | hypothetical protein               |      |           | -       | -  |
| ZMO0763 | 755960 | 754941 | -3 | 1020 | ZP_0009650  | FOG: TPR repeat                    | 144  | 3.00E-33  | COG0457 | R  |
| ZMO0764 | 756729 | 755992 | -1 | 738  | ZP_0005619  | hydrolases or acyltransferases, p  | 209  | 3.00E-53  | COG0596 | R  |
| ZMO0765 | 756996 | 758975 | 3  | 1980 | ZP_0009650  | threonyl-tRNA synthetase           | 964  | 0         | COG0441 | J  |
| ZMO0766 | 758989 | 761769 | 1  | 2781 | ZP_0009474  | UTP:glnB (protein PII) uridylyltra | 819  | 0         | COG2844 | O  |
| ZMO0767 | 761963 | 764182 | 2  | 2220 | NP_717031   | conserved hypothetical protein     | 59.3 | 3.00E-07  | -       | -  |
| ZMO0768 | 764459 | 764211 | -3 | 249  |             | hypothetical protein               |      |           | -       | -  |

|         |        |        |    |      |            |                                    |      |           |         |     |
|---------|--------|--------|----|------|------------|------------------------------------|------|-----------|---------|-----|
| ZMO0769 | 764537 | 765688 | 2  | 1152 | ZP_0009663 | tRNA (5-methylaminomethyl-2-th     | 465  | 1.00E-130 | COG0482 | J   |
| ZMO0770 | 767243 | 765774 | -3 | 1470 | ZP_0009589 | Mg/Co/Ni transporter MgtE (cont    | 534  | 1.00E-150 | COG2239 | P   |
| ZMO0771 | 767231 | 767422 | 2  | 192  |            | hypothetical protein               | -    | -         | -       | -   |
| ZMO0772 | 767352 | 767486 | 3  | 135  |            | hypothetical protein               | -    | -         | -       | -   |
| ZMO0773 | 767459 | 767926 | 2  | 468  | NP_420395  | peptidyl-prolyl cis-trans isomeras | 250  | 5.00E-66  | COG0652 | O   |
| ZMO0774 | 768833 | 767940 | -3 | 894  | ZP_0009591 | transcriptional regulator          | 255  | 7.00E-67  | COG0583 | K   |
| ZMO0775 | 768868 | 769032 | 1  | 165  |            | hypothetical protein               | -    | -         | -       | -   |
| ZMO0776 | 769365 | 769991 | 3  | 627  | ZP_0009604 | phospholipid N-methyltransferas    | 238  | 4.00E-62  | COG3963 | I   |
| ZMO0777 | 770701 | 770024 | -2 | 678  | NP_718619  | metallo-beta-lactamase family pr   | 268  | 5.00E-71  | COG0491 | R   |
| ZMO0778 | 770972 | 771373 | 3  | 402  | ZP_0003210 | cation/multidrug efflux pump       | 1133 | 0         | COG0841 | V   |
| ZMO0779 | 774196 | 775434 | 1  | 1239 | ZP_0003437 | membrane-fusion protein            | 338  | 1.00E-91  | COG0845 | M   |
| ZMO0780 | 775412 | 776914 | 2  | 1503 | ZP_0003437 | outer membrane protein             | 409  | 1.00E-113 | COG1538 | MU  |
| ZMO0781 | 777103 | 778050 | 1  | 948  | CAE78845   | transcriptional regulator, LysR fa | 241  | 1.00E-62  | COG0583 | K   |
| ZMO0782 | 779658 | 778129 | -1 | 1530 | NP_539985  | glutamyl-tRNA(gln) amidotransfe    | 621  | 1.00E-176 | COG0064 | J   |
| ZMO0783 | 781075 | 779603 | -2 | 1473 | ZP_0009311 | glutamyl-tRNA(gln) amidotransfe    | 700  | 0         | COG0154 | J   |
| ZMO0784 | 781365 | 781081 | -1 | 285  | ZP_0009311 | glutamyl-tRNA(gln) amidotransfe    | 105  | 3.00E-22  | COG0721 | J   |
| ZMO0785 | 781602 | 782141 | 3  | 540  | ZP_0009437 | endonuclease involved in recomb    | 166  | 3.00E-40  | COG0816 | L   |
| ZMO0786 | 782345 | 782905 | 2  | 561  | ZP_0008419 | conserved hypothetical protein     | 68.6 | 6.00E-11  | -       | -   |
| ZMO0787 | 782963 | 784549 | 2  | 1587 | ZP_0008419 | choline dehydrogenase and relat    | 502  | 1.00E-141 | COG2303 | E   |
| ZMO0788 | 784559 | 786076 | 2  | 1518 | BAA92379   | sorbitol dehydrogenase cytochro    | 397  | 1.00E-109 | COG2010 | C   |
| ZMO0789 | 786394 | 788919 | 1  | 2526 | NP_902858  | TonB-dependent receptor, proba     | 358  | 4.00E-97  | COG1629 | P   |
| ZMO0790 | 789561 | 789689 | 3  | 129  |            | hypothetical protein               | -    | -         | -       | -   |
| ZMO0791 | 789730 | 790689 | 1  | 960  | ZP_0009431 | aspartate carbamoyltransferase,    | 414  | 1.00E-114 | COG0540 | F   |
| ZMO0792 | 790686 | 791912 | 3  | 1227 | ZP_0009431 | dihydroorotase and related cyclic  | 426  | 1.00E-118 | COG0044 | F   |
| ZMO0793 | 792024 | 792644 | 3  | 621  |            | hypothetical protein               | -    | -         | -       | -   |
| ZMO0794 | 794736 | 792694 | -1 | 2043 | NP_422482  | prolyl oligopeptidase family prote | 712  | 0         | COG1505 | E   |
| ZMO0795 | 797029 | 794855 | -2 | 2175 | NP_950091  | outer membrane receptor for iron   | 454  | 1.00E-126 | COG1629 | P   |
| ZMO0796 | 797343 | 797185 | -1 | 159  |            | hypothetical protein               | -    | -         | -       | -   |
| ZMO0797 | 798384 | 797605 | -1 | 780  | ZP_0010856 | dehydrogenases with different sp   | 284  | 1.00E-75  | COG1028 | IQR |
| ZMO0798 | 800027 | 798618 | -3 | 1410 | ZP_0003009 | outer membrane protein             | 189  | 9.00E-47  | COG1538 | MU  |
| ZMO0799 | 801154 | 800033 | -2 | 1122 | NP_246920  | conserved hypothetical protein     | 347  | 3.00E-94  | COG0842 | V   |
| ZMO0800 | 803986 | 801164 | -2 | 2823 | NP_246921  | conserved hypothetical protein     | 995  | 0         | COG1131 | V   |
| ZMO0801 | 804977 | 803937 | -3 | 1041 | ZP_0008358 | membrane-fusion protein            | 226  | 7.00E-58  | COG0845 | M   |
| ZMO0802 | 805321 | 805130 | -2 | 192  |            | hypothetical protein               | -    | -         | -       | -   |
| ZMO0803 | 806998 | 805406 | -2 | 1593 | ZP_0009431 | FOG: TPR repeat                    | 120  | 1.00E-25  | -       | -   |
| ZMO0804 | 808107 | 807175 | -1 | 933  | NP_420191  | N-acetyl-gamma-glutamyl-phosp      | 303  | 4.00E-81  | COG0002 | E   |
| ZMO0805 | 809012 | 808116 | -3 | 897  | NP_384257  | conserved hypothetical protein     | 167  | 3.00E-40  | COG0791 | M   |
| ZMO0806 | 810490 | 809102 | -2 | 1389 | ZP_0009436 | leucyl aminopeptidase              | 468  | 1.00E-131 | COG0260 | E   |
| ZMO0807 | 811929 | 810640 | -1 | 1290 | NP_879393  | conserved hypothetical protein     | 567  | 1.00E-160 | COG0621 | J   |
| ZMO0808 | 812068 | 811898 | -2 | 171  |            | hypothetical protein               | -    | -         | -       | -   |
| ZMO0809 | 812551 | 812216 | -2 | 336  | ZP_0005174 | conserved hypothetical protein     | 79.3 | 1.00E-14  | COG1872 | S   |
| ZMO0810 | 813303 | 812572 | -1 | 732  | Q9REQJ TR  | tRNA pseudouridine synthase A      | 499  | 1.00E-140 | COG0101 | J   |
| ZMO0811 | 814205 | 813306 | -3 | 900  | ZP_0009637 | methionyl-tRNA formyltransferas    | 365  | 1.00E-100 | COG0223 | J   |
| ZMO0812 | 814355 | 814951 | 2  | 597  | ZP_0009637 | recombinational DNA repair prot    | 275  | 4.00E-73  | COG0353 | L   |
| ZMO0813 | 814974 | 815507 | 3  | 534  | NP_384525  | polypeptide deformylase            | 193  | 1.00E-48  | COG0242 | J   |
| ZMO0814 | 815592 | 816938 | 3  | 1347 | Q9REQ3 RM  | DNA recombination protein rmuC     | 869  | 0         | COG1322 | S   |
| ZMO0815 | 817211 | 816978 | -3 | 234  |            | hypothetical protein               | -    | -         | -       | -   |
| ZMO0816 | 817388 | 817254 | -3 | 135  |            | hypothetical protein               | -    | -         | -       | -   |
| ZMO0817 | 817623 | 817429 | -1 | 195  |            | hypothetical protein               | -    | -         | -       | -   |
| ZMO0818 | 817881 | 818237 | 3  | 357  | NP_947004  | 6-pyruvyl tetrahydrobiopterin syn  | 189  | 7.00E-48  | COG0720 | H   |
| ZMO0819 | 818450 | 819763 | 2  | 1314 | ZP_0005212 | UDP-glucose 6-dehydrogenase        | 616  | 1.00E-175 | COG1004 | M   |
| ZMO0820 | 822041 | 819843 | -3 | 2199 | Q9REQ6 PUI | phosphoribosylformylglycinamidi    | 1459 | 0         | COG0046 | F   |
| ZMO0821 | 822192 | 823205 | 3  | 1014 | ZP_0009436 | cysteine synthase, cysZ            | 442  | 1.00E-123 | COG0031 | E   |
| ZMO0822 | 823275 | 823637 | 3  | 363  |            | hypothetical protein               | -    | -         | -       | -   |
| ZMO0823 | 824847 | 825845 | 3  | 999  | Q9REQ9 MR  | S-adenosyl-methyltransferase m     | 630  | 1.00E-179 | COG0275 | M   |
| ZMO0824 | 825842 | 826432 | 2  | 591  |            | hypothetical protein               | -    | -         | -       | -   |
| ZMO0825 | 826510 | 828144 | 1  | 1635 | AAS14917   | penicillin-binding protein         | 332  | 2.00E-89  | COG0768 | M   |
| ZMO0826 | 828144 | 829520 | 3  | 1377 | ZP_0009348 | UDP-N-acetylmuramyl tripeptide     | 483  | 1.00E-135 | COG0769 | M   |
| ZMO0827 | 829602 | 830993 | 3  | 1392 | AAD53940   | UDP-N-acetylmuramyl pentapep       | 445  | 1.00E-124 | COG0770 | M   |
| ZMO0828 | 830981 | 832051 | 2  | 1071 | P56834 MRA | phospho-N-acetylmuramoyl-pent      | 721  | 0         | COG0472 | M   |
| ZMO0829 | 832048 | 833373 | 1  | 1326 | ZP_0009348 | UDP-N-acetylmuramoylalanine-[      | 466  | 1.00E-130 | COG0771 | M   |
| ZMO0830 | 833373 | 834608 | 3  | 1236 | NP_103116  | cell division protein              | 313  | 3.00E-84  | COG0772 | D   |
| ZMO0831 | 834605 | 835768 | 2  | 1164 | ZP_0009349 | UDP-N-acetylglucosamine:LPS f      | 438  | 1.00E-121 | COG0707 | M   |
| ZMO0832 | 835765 | 837195 | 1  | 1431 | ZP_0009349 | UDP-N-acetylmuramate-alanine       | 719  | 0.00E+00  | COG0773 | M   |
| ZMO0833 | 837192 | 838124 | 3  | 933  | Q9RNM8 MU  | UDP-N-acetylenolpyruvoylglucos     | 617  | 1.00E-175 | COG0812 | M   |
| ZMO0834 | 838121 | 839086 | 2  | 966  | NP_103112  | D-alanyl-D-alanine ligase          | 289  | 6.00E-77  | COG1181 | M   |
| ZMO0835 | 839250 | 840029 | 3  | 780  | NP_421345  | cell division protein FtsQ         | 121  | 2.00E-26  | COG1589 | M   |
| ZMO0836 | 840047 | 841309 | 2  | 1263 | NP_539501  | cell division protein FtsA         | 301  | 2.00E-80  | COG0849 | D   |
| ZMO0837 | 841526 | 842935 | 2  | 1410 | NP_386274  | cell division protein FtsZ         | 441  | 1.00E-122 | COG0206 | D   |
| ZMO0838 | 843134 | 843871 | 2  | 738  |            | hypothetical protein               | -    | -         | -       | -   |
| ZMO0839 | 843855 | 844517 | 3  | 663  |            | hypothetical protein               | -    | -         | -       | -   |
| ZMO0840 | 844676 | 845080 | 2  | 405  | ZP_0009486 | conserved hypothetical protein     | 85.9 | 1.00E-16  | -       | -   |
| ZMO0841 | 845077 | 846354 | 1  | 1278 | NP_274019  | chloride channel protein-related   | 303  | 4.00E-81  | COG0038 | P   |
| ZMO0842 | 846462 | 847622 | 3  | 1161 | Q9RNN5 DG  | deoxyguanosinetriphosphate trip    | 786  | 0         | COG0232 | F   |
| ZMO0843 | 847823 | 849319 | 2  | 1497 | ZP_0009410 | arginyl-tRNA synthetase            | 695  | 0.00E+00  | COG0018 | J   |
| ZMO0844 | 849582 | 850679 | 3  | 1098 | ZP_0009410 | conserved hypothetical protein     | 70.5 | 5.00E-11  | -       | -   |
| ZMO0845 | 850820 | 851548 | 3  | 729  | Q9RNN8 SY  | alanyl-tRNA synthetase (Alanine    | 1238 | 0         | COG0013 | J   |

|         |        |        |    |                  |                                    |      |           |         |    |
|---------|--------|--------|----|------------------|------------------------------------|------|-----------|---------|----|
| ZMO0846 | 855338 | 853572 | -3 | 1767 NP_949181   | glutathione-regulated potassium-   | 354  | 3.00E-96  | COG0475 | P  |
| ZMO0847 | 856042 | 857928 | 1  | 1887 NP_523191   | outer membrane porin OprB prec     | 202  | 2.00E-50  | COG3659 | M  |
| ZMO0848 | 858586 | 858218 | -2 | 369              | hypothetical protein               | -    | -         | -       | -  |
| ZMO0849 | 859741 | 858707 | -2 | 1035 ZP_00093571 | conserved hypothetical protein     | 179  | 6.00E-44  | -       | -  |
| ZMO0850 | 860529 | 861647 | 3  | 1119 NP_798632   | polar flagellar protein FlaK (sigm | 316  | 6.00E-85  | COG2204 | T  |
| ZMO0851 | 862262 | 861690 | -3 | 573 NP_946547    | pyridoxamine 5'-phosphate oxidase  | 218  | 5.00E-56  | COG0259 | H  |
| ZMO0852 | 863356 | 862334 | -2 | 1023 ZP_00094551 | S-adenosylmethionine:tRNA-ribc     | 442  | 1.00E-123 | COG0809 | J  |
| ZMO0853 | 864037 | 863399 | -2 | 639 NP_420395    | peptidyl-prolyl cis-trans isomeras | 171  | 1.00E-41  | COG0652 | O  |
| ZMO0854 | 864999 | 864469 | -1 | 531 ZP_00094561  | phosphopantetheine adenylyltras    | 186  | 2.00E-46  | COG0669 | H  |
| ZMO0855 | 865979 | 865089 | -3 | 891 NP_945877    | geranyltransterferase (farnesy     | 281  | 1.00E-74  | COG0142 | H  |
| ZMO0856 | 866234 | 865995 | -3 | 240 Q92R19 EX7C  | exodeoxyribonuclease VII small     | 88   | 4.00E-17  | COG1722 | L  |
| ZMO0857 | 866982 | 866317 | -1 | 666 ZP_00096071  | conserved hypothetical protein     | 255  | 5.00E-67  | COG3820 | S  |
| ZMO0858 | 867407 | 868036 | 2  | 630 ZP_0005299   | cysteine sulfinate desulfinate/cy  | 173  | 2.00E-42  | COG1104 | E  |
| ZMO0859 | 868116 | 868523 | 3  | 408 NP_220863    | NifS protein homolog (spl1)        | 89   | 2.00E-17  | COG1104 | E  |
| ZMO0860 | 868533 | 868847 | 3  | 315 ZP_00093861  | ferredoxin                         | 94   | 4.00E-19  | COG0633 | C  |
| ZMO0861 | 869297 | 871090 | 2  | 1794 NP_945968   | DNA polymerase III tau subunit     | 404  | 1.00E-111 | COG2812 | L  |
| ZMO0862 | 871249 | 871581 | 1  | 333 ZP_0009465   | conserved hypothetical protein     | 128  | 3.00E-29  | COG0718 | S  |
| ZMO0863 | 872133 | 871636 | -1 | 498 ZP_00096441  | deoxycytidine deaminase            | 324  | 6.00E-88  | COG0717 | F  |
| ZMO0864 | 872723 | 872244 | -3 | 480 ZP_00096441  | cytidine deaminase                 | 131  | 4.00E-30  | COG0295 | F  |
| ZMO0865 | 872822 | 874357 | 2  | 1536 NP_948423   | replicative DNA helicase (dnaB)    | 449  | 1.00E-125 | COG0305 | L  |
| ZMO0866 | 874473 | 875441 | 3  | 969 NP_945573    | cation efflux system protein       | 295  | 8.00E-79  | COG1230 | P  |
| ZMO0867 | 875696 | 876733 | 2  | 1038 ZP_00030951 | nucleoside-diphosphate-sugar ep    | 415  | 1.00E-115 | COG0451 | MG |
| ZMO0868 | 876733 | 877872 | 1  | 1140 ZP_00030951 | glycosyltransferases involved in   | 354  | 2.00E-96  | COG0463 | M  |
| ZMO0869 | 877836 | 878729 | 3  | 894 NP_949080    | phytoene synthase-related prote    | 257  | 2.00E-67  | COG1562 | I  |
| ZMO0870 | 878729 | 879604 | 2  | 876 ZP_00030941  | phytoene/squalene synthetase       | 271  | 1.00E-71  | COG1562 | I  |
| ZMO0871 | 879601 | 880845 | 1  | 1245 NP_949078   | oxidoreductase, putative           | 372  | 1.00E-102 | COG2907 | R  |
| ZMO0872 | 880860 | 882836 | 3  | 1977 P33990 SQH  | squalene--hopene cyclase           | 1360 | 0         | COG1657 | I  |
| ZMO0873 | 882977 | 883654 | 2  | 678 NP_841224    | purine and other phosphorylases    | 99   | 9.00E-20  | COG0775 | F  |
| ZMO0874 | 884740 | 883601 | -2 | 1140 ZP_00051291 | predicted Fe-S oxidoreductases     | 513  | 1.00E-144 | COG0535 | R  |
| ZMO0875 | 885766 | 884750 | -2 | 1017 ZP_00030951 | penicillin tolerance protein       | 438  | 1.00E-122 | COG0761 | IM |
| ZMO0876 | 886265 | 886855 | 2  | 591 ZP_00013071  | ABC-type transport system invol    | 100  | 1.00E-20  | COG2854 | Q  |
| ZMO0877 | 887254 | 886928 | -2 | 327              | hypothetical protein               | -    | -         | -       | -  |
| ZMO0878 | 888267 | 887248 | -1 | 1020 S61837      | protein-glutamate methylesteras    | 272  | 7.00E-72  | COG2201 | NT |
| ZMO0879 | 888437 | 888592 | 2  | 156              | hypothetical protein               | -    | -         | -       | -  |
| ZMO0880 | 890297 | 888630 | -3 | 1668 NP_384745   | chemotaxis sensor histidine kina   | 177  | 7.00E-43  | COG0643 | NT |
| ZMO0881 | 890349 | 890513 | 3  | 165              | hypothetical protein               | -    | -         | -       | -  |
| ZMO0882 | 891922 | 890525 | -2 | 1398 ZP_00095061 | methyl-accepting chemotaxis prc    | 277  | 3.00E-73  | COG0840 | NT |
| ZMO0883 | 892676 | 892134 | -3 | 543 ZP_00096731  | ribosomal protein S9               | 254  | 7.00E-67  | COG0103 | J  |
| ZMO0884 | 893155 | 892682 | -2 | 474 ZP_00096731  | ribosomal protein L13              | 254  | 5.00E-67  | COG0102 | J  |
| ZMO0885 | 893488 | 893871 | 1  | 384 ZP_00096721  | conserved hypothetical protein     | 90.1 | 7.00E-18  | -       | -  |
| ZMO0886 | 894464 | 893937 | -3 | 528 NP_444537    | conserved hypothetical protein     | 90.1 | 2.00E-17  | COG1430 | S  |
| ZMO0887 | 894621 | 894496 | -1 | 126              | hypothetical protein               | -    | -         | -       | -  |
| ZMO0888 | 895247 | 894699 | -3 | 549 AAF23988     | transposase, putative              | 194  | 7.00E-49  | COG1961 | L  |
| ZMO0889 | 896626 | 895478 | -2 | 1149 P05149 GALI | aldose 1-epimerase precursor (M    | 386  | 1.00E-106 | COG2017 | G  |
| ZMO0890 | 898749 | 897160 | -1 | 1590 ZP_00094261 | lysyl-tRNA synthetase (class I)    | 675  | 0         | COG1384 | J  |
| ZMO0891 | 899145 | 899041 | -1 | 105              | hypothetical protein               | -    | -         | -       | -  |
| ZMO0892 | 899175 | 901826 | 3  | 2652 ZP_00094271 | Rad3-related DNA helicases         | 922  | 0         | COG1199 | KL |
| ZMO0893 | 902870 | 901830 | -3 | 1041 NP_107604   | esterase                           | 328  | 8.00E-89  | COG1680 | V  |
| ZMO0894 | 903820 | 902912 | -2 | 909 NP_840920    | conserved hypothetical protein     | 65.1 | 2.00E-09  | -       | -  |
| ZMO0895 | 904228 | 903989 | -2 | 240              | hypothetical protein               | -    | -         | -       | -  |
| ZMO0896 | 904858 | 905676 | 1  | 819 ZP_00096761  | conserved hypothetical protein     | 108  | 1.00E-22  | -       | -  |
| ZMO0897 | 905703 | 905858 | 3  | 156              | hypothetical protein               | -    | -         | -       | -  |
| ZMO0898 | 905907 | 905755 | -1 | 153              | hypothetical protein               | -    | -         | -       | -  |
| ZMO0899 | 905909 | 907579 | 2  | 1671 ZP_00095901 | amidohydrolase (NAD+ syntheta      | 716  | 0         | COG0171 | H  |
| ZMO0900 | 907592 | 908926 | 2  | 1335 ZP_00095891 | glutamyl-tRNA synthetase           | 531  | 1.00E-149 | COG0008 | J  |
| ZMO0901 | 909147 | 908950 | -1 | 198 NP_348535    | phage related protein, uncharact   | 65.5 | 2.00E-10  | -       | -  |
| ZMO0902 | 911472 | 909220 | -1 | 2253 ZP_00032641 | outer membrane receptor proteir    | 573  | 1.00E-162 | COG1629 | P  |
| ZMO0903 | 913360 | 911666 | -2 | 1695 ZP_00094571 | Isopropylmalate/homocitrate/citr   | 752  | 0         | COG0119 | E  |
| ZMO0904 | 916781 | 913686 | -3 | 3096 NP_826933   | beta-galactosidase                 | 660  | 0         | COG1874 | G  |
| ZMO0905 | 917079 | 918650 | 3  | 1572 ZP_00014801 | glucans biosynthesis protein, per  | 390  | 1.00E-107 | COG3131 | P  |
| ZMO0906 | 918767 | 920308 | 2  | 1542 NP_420825   | glycosyl transferase family protei | 394  | 1.00E-108 | COG2943 | M  |
| ZMO0907 | 920280 | 920726 | 3  | 447 ZP_00050971  | membrane glycosyltransferase       | 66.6 | 1.00E-10  | COG2943 | M  |
| ZMO0908 | 922354 | 921182 | -2 | 1173 ZP_00094451 | capsule polysaccharide export pi   | 171  | 2.00E-41  | COG3524 | M  |
| ZMO0909 | 923688 | 922396 | -1 | 1293 ZP_00050341 | glycosyltransferase                | 209  | 9.00E-53  | COG0438 | M  |
| ZMO0910 | 924304 | 923651 | -2 | 654 emb CAB621   | polysaccharide export protein, pi  | 224  | 9.00E-58  | COG1134 | GM |
| ZMO0911 | 924590 | 925852 | 2  | 1263 ZP_00094461 | polysaccharide export periplasmi   | 202  | 8.00E-51  | COG1596 | M  |
| ZMO0912 | 926037 | 927917 | 3  | 1881 NP_420821   | conserved hypothetical protein     | 436  | 1.00E-121 | COG4805 | S  |
| ZMO0913 | 929063 | 927969 | -3 | 1095 NP_949706   | branched-chain amino acid amin     | 438  | 1.00E-122 | COG0115 | EH |
| ZMO0914 | 930006 | 929119 | -1 | 888 ZP_00096711  | 5,10-methylene-tetrahydrofolate    | 355  | 8.00E-97  | COG0190 | H  |
| ZMO0915 | 930236 | 932458 | 2  | 2223 NP_841092   | copper-transporting ATPase, cop    | 687  | 0         | COG2217 | P  |
| ZMO0916 | 932455 | 932664 | 1  | 210              | hypothetical protein               | -    | -         | COG2608 | P  |
| ZMO0917 | 933263 | 934669 | 2  | 1407 ZP_00095721 | dioxygenases related to 2-nitropr  | 704  | 0         | COG2070 | R  |
| ZMO0918 | 934833 | 936278 | 3  | 1446 ZP_00125961 | catalase                           | 605  | 1.00E-172 | COG0753 | P  |
| ZMO0919 | 937704 | 939461 | 3  | 1758 NP_813574   | two-component system sensor h      | 155  | 3.00E-36  | COG2199 | T  |
| ZMO0920 | 939866 | 939483 | -3 | 384 NP_295541    | conserved hypothetical protein     | 72.4 | 2.00E-12  | -       | -  |
| ZMO0921 | 940012 | 941145 | 1  | 1134             | hypothetical protein               | -    | -         | -       | -  |
| ZMO0922 | 941194 | 941640 | 1  | 447 NP_540143    | transcriptional regulator          | 80.1 | 7.00E-15  | COG4933 | S  |

|         |         |         |    |      |             |                                     |      |           |         |      |
|---------|---------|---------|----|------|-------------|-------------------------------------|------|-----------|---------|------|
| ZMO0923 | 942907  | 941684  | -2 | 1224 | ZP_0009361f | N-acetylglutamate synthase (N-a     | 487  | 1.00E-136 | COG1364 | E    |
| ZMO0924 | 943263  | 946040  | 3  | 2778 | ZP_0009361f | preprotein translocase subunit S    | 1246 | 0         | COG0653 | U    |
| ZMO0925 | 946264  | 946788  | 1  | 525  | NP_102024   | cold shock protein                  | 108  | 6.00E-23  | COG1278 | K    |
| ZMO0926 | 946933  | 947442  | 1  | 510  | NP_422488   | ABC transporter, substrate-bindir   | 116  | 2.00E-25  | COG1463 | Q    |
| ZMO0927 | 948748  | 947948  | -2 | 801  | ZP_0009628f | leu/phe-tRNA-protein transferase    | 221  | 2.00E-56  | COG2360 | O    |
| ZMO0928 | 948904  | 949464  | 1  | 561  | NP_420990   | conserved hypothetical protein      | 201  | 5.00E-51  | COG3191 | EQ   |
| ZMO0929 | 950043  | 949924  | -1 | 120  |             | hypothetical protein                |      |           | -       | -    |
| ZMO0930 | 950488  | 950054  | -2 | 435  |             | hypothetical protein                |      |           | -       | -    |
| ZMO0931 | 950690  | 950475  | -3 | 216  |             | hypothetical protein                |      |           | -       | -    |
| ZMO0932 | 951276  | 950731  | -1 | 546  | NP_539912   | secretion activator protein         | 56.2 | 2.00E-07  | COG3926 | R    |
| ZMO0933 | 951241  | 951375  | 1  | 135  |             | hypothetical protein                |      |           | -       | -    |
| ZMO0934 | 951743  | 951423  | -3 | 321  |             | hypothetical protein                |      |           | -       | -    |
| ZMO0935 | 952601  | 951975  | -3 | 627  | ZP_0003337f | glutathione S-transferase           | 215  | 5.00E-55  | COG0625 | O    |
| ZMO0936 | 952890  | 953780  | 3  | 891  | NP_949636   | permeases of the drug/metabolit     | 186  | 7.00E-46  | COG0697 | GER  |
| ZMO0937 | 955038  | 953821  | -1 | 1218 | ZP_0006752f | aspartate/tyrosine/aromatic amin    | 340  | 4.00E-92  | COG1448 | E    |
| ZMO0938 | 955358  | 957088  | 2  | 1731 | AAA74034    | alkaline phosphatase                | 1151 | 0         | COG1524 | R    |
| ZMO0939 | 958390  | 957095  | -2 | 1296 | ZP_0008379f | cytosine deaminase and related      | 398  | 1.00E-109 | COG0402 | FR   |
| ZMO0940 | 958903  | 958409  | -2 | 495  | ZP_0001574f | transcriptional regulators          | 124  | 9.00E-28  | COG1846 | K    |
| ZMO0941 | 960018  | 959023  | -1 | 996  | AAO38864    | nucleotide sugar epimerase          | 629  | 0         | COG0451 | MG   |
| ZMO0942 | 961759  | 960227  | -2 | 1533 | AAO38865    | invertase A                         | 1060 | 0         | COG1621 | G    |
| ZMO0943 | 961871  | 961746  | -3 | 126  |             | hypothetical protein                |      |           | -       | -    |
| ZMO0944 | 961914  | 961795  | -1 | 120  |             | hypothetical protein                |      |           | -       | -    |
| ZMO0945 | 962985  | 962104  | -1 | 882  | NP_102213   | conserved hypothetical protein      | 190  | 3.00E-47  | COG2017 | G    |
| ZMO0946 | 963329  | 964807  | 2  | 1479 | ZP_0009431f | peptidyl-prolyl cis-trans isomeras  | 541  | 1.00E-154 | COG0544 | O    |
| ZMO0947 | 964825  | 965790  | 1  | 966  | NP_484086   | conserved hypothetical protein      | 310  | 2.00E-83  | COG0463 | M    |
| ZMO0948 | 965869  | 966501  | 1  | 633  | ZP_0009432f | heat shock protein, protease sub    | 321  | 7.00E-87  | COG0740 | OU   |
| ZMO0949 | 966651  | 967919  | 3  | 1269 | ZP_0009432f | heat shock protein, ATP-dependt     | 684  | 0         | COG1219 | O    |
| ZMO0950 | 968584  | 967979  | -2 | 606  | ZP_0009596f | acetyltransferase                   | 162  | 4.00E-39  | COG0454 | KR   |
| ZMO0951 | 969430  | 968594  | -2 | 837  | ZP_0009596f | coproporphyrinogen III oxidase      | 343  | 2.00E-93  | COG0408 | H    |
| ZMO0952 | 969890  | 969438  | -3 | 453  | NP_103994   | RNA methyltransferase               | 162  | 2.00E-39  | COG0219 | J    |
| ZMO0953 | 969917  | 970036  | 2  | 120  |             | hypothetical protein                |      |           | -       | -    |
| ZMO0954 | 970108  | 970004  | -2 | 105  |             | hypothetical protein                |      |           | -       | -    |
| ZMO0955 | 971080  | 970811  | -2 | 270  | NP_659770   | conserved hypothetical protein      | 110  | 8.00E-24  | COG3293 | L    |
| ZMO0956 | 972065  | 972697  | 2  | 633  | ZP_0009474f | ubiquinol-cytochrome-c reductas     | 222  | 4.00E-57  | COG0723 | C    |
| ZMO0957 | 972705  | 973961  | 3  | 1257 | ZP_0009474f | cytochrome b subunit of the bc c    | 538  | 1.00E-151 | COG1290 | C    |
| ZMO0958 | 973963  | 974802  | 1  | 840  | ZP_0009474f | cytochrome c1                       | 239  | 6.00E-62  | COG2857 | C    |
| ZMO0959 | 975295  | 974735  | -2 | 561  | ZP_0009333f | membrane carboxypeptidase (pe       | 204  | 7.00E-52  | COG0744 | M    |
| ZMO0960 | 975503  | 975318  | -3 | 186  |             | hypothetical protein                |      |           | -       | -    |
| ZMO0961 | 975661  | 976110  | 1  | 450  | P04164 C552 | cytochrome c-552 precursor (C5-     | 94.7 | 6.00E-19  | COG2010 | C    |
| ZMO0962 | 977260  | 976121  | -2 | 1140 | NP_419353   | N-acetylglucosamine-6-phospha       | 328  | 1.00E-88  | COG1820 | G    |
| ZMO0963 | 977956  | 977342  | -2 | 615  | NP_900381   | transcriptional regulator, tetR fan | 118  | 7.00E-26  | COG1309 | K    |
| ZMO0964 | 978061  | 979494  | 1  | 1434 | NP_900380   | outer membrane multidrug resist     | 398  | 1.00E-109 | COG1538 | MU   |
| ZMO0965 | 979516  | 980721  | 1  | 1206 | NP_049065   | aromatic efflux pump membrane       | 389  | 1.00E-107 | COG1566 | V    |
| ZMO0966 | 980699  | 981712  | 2  | 1014 | NP_900378   | multidrug resistance protein        | 341  | 2.00E-95  | COG0477 | GEPR |
| ZMO0967 | 982393  | 983589  | 1  | 1197 | ZP_0009672f | nucleoside permease                 | 442  | 1.00E-123 | COG1972 | F    |
| ZMO0968 | 983593  | 983820  | 1  | 228  |             | hypothetical protein                |      |           | -       | -    |
| ZMO0969 | 983792  | 985129  | 2  | 1338 | NP_419005   | xanthine/uracil permease family     | 526  | 1.00E-148 | COG2252 | R    |
| ZMO0970 | 985203  | 986255  | 3  | 1053 | NP_419006   | purine nucleoside permease, put     | 261  | 2.00E-68  | COG5042 | F    |
| ZMO0971 | 986292  | 987305  | 3  | 1014 | NP_421974   | adenosine deaminase                 | 401  | 1.00E-110 | COG1816 | F    |
| ZMO0972 | 987394  | 988548  | 1  | 1155 | ZP_0002810f | glycosyltransferases, probably in   | 290  | 5.00E-77  | COG1215 | M    |
| ZMO0973 | 988566  | 989993  | 3  | 1428 | ZP_0002810f | Fe-S oxidoreductase                 | 655  | 0         | COG1032 | C    |
| ZMO0974 | 990009  | 990854  | 3  | 846  | ZP_0009245f | conserved hypothetical protein      | 254  | 1.00E-66  | COG3394 | S    |
| ZMO0975 | 991056  | 992045  | 3  | 990  | ZP_0005433f | conserved hypothetical integral r   | 154  | 4.00E-36  | -       | -    |
| ZMO0976 | 993258  | 992242  | -1 | 1017 | NP_249818   | oxidoreductase, putative            | 447  | 1.00E-124 | COG0667 | C    |
| ZMO0977 | 993254  | 993400  | 2  | 147  |             | hypothetical protein                |      |           | -       | -    |
| ZMO0978 | 994583  | 993405  | -3 | 1179 | NP_947426   | Fe ABC transporter, probable        | 164  | 4.00E-39  | COG0614 | P    |
| ZMO0979 | 994636  | 996747  | 1  | 2112 | NP_420558   | TonB-dependent receptor             | 507  | 1.00E-142 | COG4206 | H    |
| ZMO0980 | 997920  | 996817  | -1 | 1104 | NP_945358   | DNA polymerase III beta subunit     | 413  | 1.00E-114 | COG0592 | L    |
| ZMO0981 | 999617  | 998031  | -3 | 1587 | ZP_0002836f | ABC-type uncharacterized transp     | 320  | 5.00E-86  | COG1123 | R    |
| ZMO0982 | 1000432 | 999620  | -2 | 813  | NP_102837   | permease protein of oligopeptide    | 199  | 5.00E-50  | COG1173 | EP   |
| ZMO0983 | 1002911 | 1002417 | -1 | 495  | NP_102835   | ABC transporter, dipeptide-bindir   | 210  | 8.00E-53  | COG0747 | E    |
| ZMO0984 | 1003914 | 1003045 | -1 | 870  | ZP_0005407f | membrane proteins related to me     | 165  | 9.00E-40  | COG0739 | M    |
| ZMO0985 | 1004678 | 1003917 | -3 | 762  | NP_771386   | stationary-phase survival protein   | 218  | 1.00E-55  | COG0496 | R    |
| ZMO0986 | 1005955 | 1004684 | -2 | 1272 | ZP_0009625f | seryl-tRNA synthetase               | 567  | 1.00E-160 | COG0172 | J    |
| ZMO0987 | 1006255 | 1006740 | 1  | 486  | ZP_0009451f | DnaK suppressor protein             | 196  | 2.00E-49  | COG1734 | T    |
| ZMO0988 | 1007148 | 1007345 | 3  | 198  | ZP_0009605f | conserved hypothetical protein      | 73.6 | 9.00E-13  | COG5481 | S    |
| ZMO0989 | 1007926 | 1007444 | -2 | 483  | ZP_0001435f | heat shock protein, molecular ch    | 160  | 8.00E-39  | COG0071 | O    |
| ZMO0990 | 1008202 | 1008086 | -2 | 117  |             | hypothetical protein                |      |           | -       | -    |
| ZMO0991 | 1008117 | 1008257 | 3  | 141  |             | hypothetical protein                |      |           | -       | -    |
| ZMO0992 | 1009867 | 1008341 | -2 | 1527 | ZP_0003469f | carboxypeptidase C (cathepsin A     | 466  | 1.00E-130 | COG2939 | E    |
| ZMO0993 | 1010071 | 1010184 | 1  | 114  |             | hypothetical protein                |      |           | -       | -    |
| ZMO0994 | 1010835 | 1010311 | -1 | 525  |             | hypothetical protein                |      |           | -       | -    |
| ZMO0995 | 1011023 | 1011127 | 2  | 105  |             | hypothetical protein                |      |           | -       | -    |
| ZMO0996 | 1011165 | 1012262 | 3  | 1098 | ZP_0002858f | small-conductance mechanosen:       | 213  | 7.00E-54  | COG0668 | M    |
| ZMO0997 | 1012264 | 1012890 | 1  | 627  | S18559      | 2-dehydro-3-deoxy-phosphoglu        | 405  | 1.00E-112 | COG0800 | G    |
| ZMO0998 | 1013229 | 1013771 | 3  | 543  | ZP_0009451f | peptide methionine sulfoxide red    | 227  | 1.00E-58  | COG0225 | O    |
| ZMO0999 | 1014786 | 1013803 | -1 | 984  | ZP_0000809f | translation factor (SUA5), putativ  | 314  | 2.00E-84  | COG0009 | J    |

|         |         |         |    |      |            |                                       |      |           |         |    |
|---------|---------|---------|----|------|------------|---------------------------------------|------|-----------|---------|----|
| ZMO1000 | 1015219 | 1017498 | 1  | 2280 | NP_419301  | 5-methyltetrahydropteroyltriglu       | 981  | 0         | COG0620 | E  |
| ZMO1001 | 1017751 | 1019244 | 1  | 1494 | NP_388249  | similar to di-tripeptide ABC trans    | 336  | 8.00E-91  | COG3104 | E  |
| ZMO1002 | 1019317 | 1020654 | 1  | 1338 | ZP_0009555 | phosphomannomutase                    | 615  | 1.00E-175 | COG1109 | G  |
| ZMO1003 | 1020617 | 1021495 | 2  | 879  | ZP_0009555 | hydroxymethylpyrimidine/phosph        | 275  | 1.00E-72  | COG0351 | H  |
| ZMO1004 | 1021495 | 1022142 | 1  | 648  | ZP_0005590 | ribonuclease HII                      | 189  | 2.00E-47  | COG0164 | L  |
| ZMO1005 | 1022339 | 1023460 | 2  | 1122 | O30570     | MTB modification methylase BabI (ad   | 469  | 1.00E-131 | COG0863 | L  |
| ZMO1006 | 1023496 | 1024566 | 1  | 1071 | ZP_0009328 | dihydropteroate synthase and re       | 272  | 7.00E-72  | COG0294 | H  |
| ZMO1007 | 1024688 | 1025551 | 2  | 864  | NP_795226  | conserved hypothetical protein        | 221  | 1.00E-56  | COG3781 | S  |
| ZMO1008 | 1025677 | 1027122 | 1  | 1446 | ZP_0009362 | FAD/FMN-containing dehydroge          | 426  | 1.00E-118 | COG0277 | C  |
| ZMO1009 | 1027261 | 1028049 | 1  | 789  | ZP_0009362 | conserved hypothetical protein        | 284  | 1.00E-75  | -       | -  |
| ZMO1010 | 1028150 | 1028605 | 2  | 456  | NP_753841  | conserved hypothetical protein        | 160  | 1.00E-38  | -       | -  |
| ZMO1011 | 1029009 | 1028830 | -1 | 180  | ZP_0000822 | conserved hypothetical protein        | 56.2 | 1.00E-07  | COG3024 | S  |
| ZMO1012 | 1030045 | 1029038 | -2 | 1008 | ZP_0009502 | ribonucleases G and E                 | 201  | 1.00E-50  | -       | -  |
| ZMO1013 | 1030654 | 1030052 | -2 | 603  | ZP_0009502 | nucleotide-binding protein implic     | 204  | 9.00E-52  | COG0424 | D  |
| ZMO1014 | 1030923 | 1030666 | -1 | 258  | ZP_0009502 | translation initiation factor 1 (IF-1 | 138  | 3.00E-32  | COG0361 | J  |
| ZMO1015 | 1031722 | 1031102 | -2 | 621  | ZP_0009335 | conserved hypothetical protein        | 103  | 2.00E-21  | -       | -  |
| ZMO1016 | 1032675 | 1031734 | -1 | 942  | ZP_0009335 | ABC-type transport system invol       | 262  | 6.00E-69  | COG1463 | Q  |
| ZMO1017 | 1033477 | 1032692 | -2 | 786  | ZP_0009335 | ABC-type transport system invol       | 317  | 2.00E-85  | COG1127 | Q  |
| ZMO1018 | 1034574 | 1033480 | -1 | 1095 | ZP_0009335 | ABC-type transport system invol       | 359  | 4.00E-98  | COG0767 | Q  |
| ZMO1019 | 1035809 | 1034763 | -3 | 1047 | NP_819749  | deoxyhypusine synthase, putativ       | 484  | 1.00E-135 | COG1899 | O  |
| ZMO1020 | 1037072 | 1035897 | -3 | 1176 | ZP_0009489 | diaminopimelate (ornithine) deca      | 521  | 5.00E-163 | COG0019 | E  |
| ZMO1021 | 1038045 | 1037398 | -1 | 648  | ZP_0009307 | predicted hydrolase of the alpha/     | 365  | 1.00E-100 | COG2945 | R  |
| ZMO1022 | 1038181 | 1039227 | 1  | 1047 | ZP_0009307 | cysteine sulfinate desulfinase/cy     | 298  | 1.00E-79  | COG1104 | E  |
| ZMO1023 | 1039279 | 1040043 | 1  | 765  | ZP_0002816 | ATPase, predicted PP-loop supe        | 342  | 4.00E-93  | COG0603 | R  |
| ZMO1024 | 1040429 | 1040328 | -3 | 102  | -          | hypothetical protein                  | -    | -         | -       | -  |
| ZMO1025 | 1040392 | 1042410 | 1  | 2019 | NP_942878  | anaerobic class III ribonucleotide    | 929  | 0         | COG1328 | F  |
| ZMO1026 | 1042447 | 1042635 | 1  | 189  | NP_942877  | conserved hypothetical protein        | 80.1 | 1.00E-14  | -       | -  |
| ZMO1027 | 1042622 | 1043224 | 2  | 603  | ZP_0001531 | pyruvate-formate lyase-activatin      | 227  | 1.00E-58  | COG1180 | O  |
| ZMO1028 | 1043328 | 1043224 | -1 | 105  | -          | hypothetical protein                  | -    | -         | -       | -  |
| ZMO1029 | 1043305 | 1044222 | 1  | 918  | ZP_0009961 | ABC-type multidrug transport sys      | 208  | 1.00E-52  | COG1131 | V  |
| ZMO1030 | 1044231 | 1045031 | 3  | 801  | NP_241313  | conserved hypothetical protein        | 61.2 | 2.00E-08  | COG4200 | S  |
| ZMO1031 | 1045052 | 1045213 | 2  | 162  | -          | hypothetical protein                  | -    | -         | -       | -  |
| ZMO1032 | 1045191 | 1046366 | 3  | 1176 | ZP_0009505 | predicted Fe-S-cluster redox enz      | 568  | 1.00E-161 | COG0820 | R  |
| ZMO1033 | 1046422 | 1047669 | 1  | 1248 | ZP_0009602 | cyclopropane fatty acid synthase      | 411  | 1.00E-113 | COG2230 | M  |
| ZMO1034 | 1048401 | 1047793 | -1 | 609  | ZP_0009653 | conserved hypothetical protein        | 66.2 | 4.00E-10  | -       | -  |
| ZMO1035 | 1048662 | 1048516 | -1 | 147  | -          | hypothetical protein                  | -    | -         | -       | -  |
| ZMO1036 | 1048664 | 1049890 | 2  | 1227 | ZP_0009382 | argininosuccinate synthase            | 677  | 0         | COG0137 | E  |
| ZMO1037 | 1050125 | 1050235 | 2  | 111  | -          | hypothetical protein                  | -    | -         | -       | -  |
| ZMO1038 | 1050196 | 1050324 | 1  | 129  | -          | hypothetical protein                  | -    | -         | -       | -  |
| ZMO1039 | 1052248 | 1051409 | -1 | 840  | ZP_0009680 | ribonucleotide reductase, alpha s     | 523  | 1.00E-148 | COG0209 | F  |
| ZMO1040 | 1052996 | 1056211 | 2  | 3216 | NP_779782  | TonB-dependent receptor               | 398  | 1.00E-109 | COG1629 | P  |
| ZMO1041 | 1057006 | 1056455 | -2 | 552  | ZP_0009623 | NTP pyrophosphohydrolases inc         | 173  | 2.00E-42  | COG0494 | LR |
| ZMO1042 | 1058221 | 1057097 | -2 | 1125 | NP_422250  | conserved hypothetical protein        | 125  | 2.00E-27  | COG1512 | R  |
| ZMO1043 | 1058777 | 1058157 | -3 | 621  | ZP_0009622 | conserved hypothetical protein        | 231  | 1.00E-59  | COG1704 | S  |
| ZMO1044 | 1059012 | 1059476 | 3  | 465  | ZP_0002901 | mechanosensitive channel              | 156  | 2.00E-37  | COG1970 | M  |
| ZMO1045 | 1061145 | 1059565 | -1 | 1581 | -          | hypothetical protein                  | -    | -         | -       | -  |
| ZMO1046 | 1061127 | 1061354 | 3  | 228  | -          | hypothetical protein                  | -    | -         | -       | -  |
| ZMO1047 | 1061414 | 1062454 | 2  | 1041 | NP_519650  | ABC transporter phosphate-bind        | 390  | 1.00E-107 | COG0226 | P  |
| ZMO1048 | 1062549 | 1063508 | 3  | 960  | ZP_0014542 | conserved hypothetical protein        | 316  | 4.00E-85  | COG0573 | P  |
| ZMO1049 | 1063517 | 1064353 | 2  | 837  | NP_104767  | phosphate transport system perr       | 295  | 7.00E-79  | COG0581 | P  |
| ZMO1050 | 1064269 | 1065225 | 1  | 957  | Q9AML4     | IPST phosphate import ATP-binding pr  | 329  | 5.00E-89  | COG1117 | P  |
| ZMO1051 | 1065330 | 1065208 | -1 | 123  | -          | hypothetical protein                  | -    | -         | -       | -  |
| ZMO1052 | 1065560 | 1066339 | 2  | 780  | NP_697856  | phosphoribosylaminoimidazole-s        | 373  | 1.00E-102 | COG0152 | F  |
| ZMO1053 | 1066567 | 1066439 | -2 | 129  | -          | hypothetical protein                  | -    | -         | -       | -  |
| ZMO1054 | 1066743 | 1068989 | 3  | 2247 | NP_108473  | DNA topoisomerase IV subunitA         | 819  | 0         | COG0188 | L  |
| ZMO1055 | 1069238 | 1070977 | 2  | 1740 | ZP_0011121 | FOG: PAS/PAC domain                   | 326  | 8.00E-88  | COG5001 | T  |
| ZMO1056 | 1072191 | 1070977 | -1 | 1215 | ZP_0009595 | tRNA nucleotidyltransferase/poly      | 330  | 5.00E-89  | COG0617 | J  |
| ZMO1057 | 1072729 | 1072202 | -2 | 528  | ZP_0009595 | acetyltransferase, putative           | 155  | 4.00E-37  | COG3153 | R  |
| ZMO1058 | 1072752 | 1072910 | 3  | 159  | -          | hypothetical protein                  | -    | -         | -       | -  |
| ZMO1059 | 1073129 | 1073551 | 2  | 423  | NP_518278  | conserved hypothetical protein        | 68.2 | 3.00E-11  | COG1539 | H  |
| ZMO1060 | 1074237 | 1073617 | -1 | 621  | ZP_0009555 | superoxide dismutase                  | 213  | 2.00E-54  | COG0605 | P  |
| ZMO1061 | 1075528 | 1074458 | -2 | 1071 | ZP_0009485 | transcriptional regulators contain    | 420  | 1.00E-116 | COG1221 | KT |
| ZMO1062 | 1075707 | 1076225 | 3  | 519  | -          | hypothetical protein                  | -    | -         | -       | -  |
| ZMO1063 | 1076228 | 1076896 | 2  | 669  | ZP_0009484 | phage shock protein A (IM30), su      | 233  | 3.00E-60  | COG1842 | KT |
| ZMO1064 | 1076896 | 1077168 | 1  | 273  | ZP_0009484 | conserved hypothetical protein        | 77.4 | 6.00E-14  | -       | -  |
| ZMO1065 | 1077186 | 1077569 | 3  | 384  | ZP_0009484 | stress-responsive transcriptional     | 106  | 8.00E-23  | COG1983 | KT |
| ZMO1066 | 1077706 | 1077894 | 1  | 189  | -          | hypothetical protein                  | -    | -         | -       | -  |
| ZMO1067 | 1078027 | 1078431 | 1  | 405  | ZP_0009484 | SufE protein probably involved ir     | 187  | 3.00E-47  | COG2166 | R  |
| ZMO1068 | 1078428 | 1078862 | 3  | 435  | -          | hypothetical protein                  | -    | -         | -       | -  |
| ZMO1069 | 1079426 | 1078908 | -3 | 519  | ZP_0009594 | heat shock protein, DnaJ-class n      | 204  | 8.00E-52  | COG2214 | O  |
| ZMO1070 | 1080932 | 1080006 | -3 | 927  | ZP_0009318 | signal recognition particle GTPa      | 426  | 1.00E-118 | COG0552 | U  |
| ZMO1071 | 1082188 | 1080935 | -2 | 1254 | NP_422478  | conserved hypothetical protein        | 398  | 1.00E-109 | COG0621 | J  |
| ZMO1072 | 1082994 | 1082191 | -1 | 804  | ZP_0009318 | diaminopimelate epimerase             | 323  | 2.00E-87  | COG0253 | E  |
| ZMO1073 | 1082971 | 1083150 | 1  | 180  | -          | hypothetical protein                  | -    | -         | -       | -  |
| ZMO1074 | 1083340 | 1083230 | -2 | 111  | -          | hypothetical protein                  | -    | -         | -       | -  |
| ZMO1075 | 1083359 | 1084783 | 2  | 1425 | ZP_0009318 | signal recognition particle GTPa      | 635  | 0         | COG0541 | U  |
| ZMO1076 | 1084814 | 1085245 | 2  | 432  | ZP_0009508 | ribosomal protein S16                 | 191  | 3.00E-48  | COG0228 | J  |

|         |         |         |    |      |             |                                     |      |           |         |    |
|---------|---------|---------|----|------|-------------|-------------------------------------|------|-----------|---------|----|
| ZMO1077 | 1085249 | 1085740 | 2  | 492  | ZP_0009508  | 16S rRNA processing RimM prot       | 137  | 7.00E-32  | COG0806 | J  |
| ZMO1078 | 1085737 | 1086486 | 1  | 750  | ZP_0009508  | tRNA-(guanine-N1)-methyltransf      | 342  | 5.00E-93  | COG0336 | J  |
| ZMO1079 | 1086483 | 1086857 | 3  | 375  | ZP_0009508  | ribosomal protein L19               | 194  | 2.00E-49  | COG0335 | J  |
| ZMO1080 | 1087000 | 1087185 | 1  | 186  |             | hypothetical protein                | -    | -         | -       | -  |
| ZMO1081 | 1087238 | 1087858 | 2  | 621  |             | hypothetical protein                | -    | -         | -       | -  |
| ZMO1082 | 1087830 | 1088051 | 3  | 222  |             | hypothetical protein                | -    | -         | -       | -  |
| ZMO1083 | 1088029 | 1090026 | 1  | 1998 | ZP_0008972  | glycosyltransferases involved in    | 659  | 0         | COG1215 | M  |
| ZMO1084 | 1090023 | 1092338 | 3  | 2316 | NP_643824   | conserved hypothetical protein      | 395  | 1.00E-108 | -       | -  |
| ZMO1085 | 1092335 | 1096345 | 2  | 4011 | NP_643822   | cellulose synthase subunit C        | 208  | 8.00E-52  | COG0457 | R  |
| ZMO1086 | 1096501 | 1097520 | 1  | 1020 | ZP_0008972  | endoglucanase Y                     | 306  | 5.00E-82  | COG3405 | G  |
| ZMO1087 | 1097599 | 1098684 | 1  | 1086 | ZP_0013743  | membrane-bound lytic murein tra     | 222  | 8.00E-57  | COG2951 | M  |
| ZMO1088 | 1098641 | 1099141 | 2  | 501  | AAS14213    | rare lipoprotein A, putative        | 142  | 3.00E-33  | COG0797 | M  |
| ZMO1089 | 1099193 | 1100395 | 2  | 1203 | ZP_0009547  | D-alanyl-D-alanine carboxypeptid    | 352  | 1.00E-95  | COG1686 | M  |
| ZMO1090 | 1100374 | 1101024 | 1  | 651  | NP_385710   | thymidylate kinase (dTMP kinase     | 188  | 6.00E-47  | COG0125 | F  |
| ZMO1091 | 1101024 | 1102016 | 3  | 993  | AAF06832    | DNA polymerase III delta prime ε    | 159  | 1.00E-37  | COG0470 | L  |
| ZMO1092 | 1102034 | 1103599 | 2  | 1566 | NP_948120   | methionyl-tRNA synthetase           | 640  | 0         | COG0143 | J  |
| ZMO1093 | 1103599 | 1104375 | 1  | 777  | ZP_0009305  | Mg-dependent DNase                  | 323  | 2.00E-87  | COG0084 | L  |
| ZMO1094 | 1104372 | 1105136 | 3  | 765  | ZP_0009305  | metal-dependent hydrolases of tl    | 253  | 3.00E-66  | COG1235 | R  |
| ZMO1095 | 1105488 | 1106309 | 3  | 822  | ZP_0009320  | pyrophosphatase, predicted          | 250  | 2.00E-65  | COG1694 | R  |
| ZMO1096 | 1109035 | 1109753 | -2 | 2283 | ZP_0009548  | exoribonuclease R                   | 822  | 0         | COG0557 | K  |
| ZMO1097 | 1109457 | 1109143 | -1 | 315  | ZP_0005549  | thiol-disulfide isomerase and thic  | 141  | 3.00E-33  | COG0526 | OC |
| ZMO1098 | 1113030 | 1109548 | -1 | 3483 | ZP_0009509  | ATP-dependent exoDNase (exor        | 622  | 1.00E-176 | COG1074 | L  |
| ZMO1099 | 1116021 | 1113046 | -1 | 2976 | ZP_0009509  | helicase, inactivated superfamily   | 714  | 0         | COG3893 | L  |
| ZMO1100 | 1116791 | 1116036 | -3 | 756  | ZP_0009509  | nucleotidyl pyrophosphorylase in    | 258  | 1.00E-67  | COG1208 | MJ |
| ZMO1101 | 1117391 | 1116873 | -3 | 519  | ZP_0009509  | ATPase or kinase, predicted         | 127  | 7.00E-29  | COG0802 | R  |
| ZMO1102 | 1119384 | 1117381 | -1 | 2004 | ZP_0009509  | two-component sensor signal tra     | 521  | 5.00E-163 | COG2202 | T  |
| ZMO1103 | 1119793 | 1119617 | -2 | 177  |             | hypothetical protein                | -    | -         | -       | -  |
| ZMO1104 | 1119940 | 1119824 | -2 | 117  |             | hypothetical protein                | -    | -         | -       | -  |
| ZMO1105 | 1122374 | 1120065 | -3 | 2310 | ZP_0009466  | two-component sensor signal tra     | 119  | 3.00E-25  | COG0642 | T  |
| ZMO1106 | 1122400 | 1122531 | 1  | 132  |             | hypothetical protein                | -    | -         | -       | -  |
| ZMO1107 | 1122623 | 1123105 | 2  | 483  | ZP_0009466  | transcriptional regulators          | 225  | 2.00E-58  | COG1522 | K  |
| ZMO1108 | 1123326 | 1123177 | -1 | 150  |             | hypothetical protein                | -    | -         | -       | -  |
| ZMO1109 | 1124658 | 1123342 | -1 | 1317 | ZP_0009371  | conserved hypothetical protein      | 150  | 7.00E-35  | -       | -  |
| ZMO1110 | 1124977 | 1124873 | -2 | 105  |             | hypothetical protein                | -    | -         | -       | -  |
| ZMO1111 | 1124998 | 1126245 | 1  | 1248 | NP_346805   | ABC transporter (permease)          | 190  | 6.00E-47  | COG2807 | P  |
| ZMO1112 | 1126849 | 1126253 | -2 | 597  | ZP_0009318  | intracellular septation protein A   | 172  | 4.00E-42  | COG2917 | D  |
| ZMO1113 | 1127117 | 1128442 | 2  | 1326 | NP_753292   | NADH dehydrogenase                  | 405  | 1.00E-112 | COG1252 | C  |
| ZMO1114 | 1128573 | 1129193 | 3  | 621  | NP_947144   | uracil-DNA glycosylase:Phage S      | 162  | 4.00E-39  | COG1573 | L  |
| ZMO1115 | 1129615 | 1130418 | 1  | 804  | Q9RNL1 JUP  | putative undecaprenol kinase (B     | 520  | 5.00E-163 | COG1968 | V  |
| ZMO1116 | 1130576 | 1132048 | 2  | 1473 | AAD56915    | glutamate synthase [NADPH] sr       | 932  | 0         | COG0493 | ER |
| ZMO1117 | 1132150 | 1136745 | 1  | 4596 | Q05755 GLT  | glutamate synthase [NADPH] lar      | 1901 | 0         | COG0069 | E  |
| ZMO1118 | 1136825 | 1137496 | 2  | 672  | AAS14715    | glutathione S-transferase family    | 194  | 1.00E-48  | COG0625 | O  |
| ZMO1119 | 1137540 | 1137644 | 3  | 105  |             | hypothetical protein                | -    | -         | -       | -  |
| ZMO1120 | 1137718 | 1137554 | -2 | 165  |             | hypothetical protein                | -    | -         | -       | -  |
| ZMO1121 | 1138219 | 1137749 | -2 | 471  | ZP_0005447  | transcriptional regulators, predict | 100  | 9.00E-21  | COG0789 | K  |
| ZMO1122 | 1138562 | 1138227 | -3 | 336  | Q9RNZ5 JHF  | integration host factor alpha-sub   | 197  | 5.00E-50  | COG0776 | L  |
| ZMO1123 | 1138742 | 1138629 | -3 | 114  |             | hypothetical protein                | -    | -         | -       | -  |
| ZMO1124 | 1140802 | 1139381 | -2 | 1422 | NP_771130   | two-component response regulat      | 521  | 5.00E-163 | COG2204 | T  |
| ZMO1125 | 1143108 | 1140808 | -1 | 2301 | ZP_0009320  | two-component signal transducti     | 577  | 1.00E-163 | COG5000 | T  |
| ZMO1126 | 1143553 | 1143245 | -2 | 309  | AAB35496    | nitrogen assimilation regulatory p  | 80.5 | 6.00E-15  | COG2204 | T  |
| ZMO1127 | 1144591 | 1143572 | -2 | 1020 | P45672 DUS  | tRNA-dihydrouridine synthase        | 413  | 1.00E-114 | COG0042 | J  |
| ZMO1128 | 1144746 | 1145906 | 3  | 1161 | Q9RNR2 JSD  | IspD/IspF bifunctional enzyme       | 655  | 0         | COG0245 | I  |
| ZMO1129 | 1145918 | 1146457 | 2  | 540  | ZP_0009372  | conserved hypothetical protein      | 80.9 | 1.00E-14  | -       | -  |
| ZMO1130 | 1146408 | 1147148 | 3  | 741  | NP_947931   | possible competence-damaged p       | 139  | 7.00E-32  | COG1546 | R  |
| ZMO1131 | 1147775 | 1147338 | -3 | 438  | ZP_0005329  | Oligoketide cyclase/lipid transpo   | 166  | 1.00E-40  | COG2867 | I  |
| ZMO1132 | 1148746 | 1147781 | -2 | 966  | Q9RNY7 LIP  | lipoic acid synthetase (Lip-syn) (l | 646  | 0         | COG0320 | H  |
| ZMO1133 | 1148850 | 1149479 | 3  | 630  | ZP_0009371  | carbonic anhydrase                  | 222  | 4.00E-57  | COG0288 | P  |
| ZMO1134 | 1149495 | 1150391 | 3  | 897  |             | hypothetical protein                | -    | -         | -       | -  |
| ZMO1135 | 1151789 | 1150449 | -3 | 1341 | ZP_0009682  | Zn-dependent proteases, predict     | 483  | 1.00E-135 | COG0312 | R  |
| ZMO1136 | 1153359 | 1151920 | -1 | 1440 | AAF14629    | cytochrome c peroxidase             | 400  | 1.00E-110 | COG1858 | P  |
| ZMO1137 | 1154700 | 1153789 | -1 | 912  | NP_698389   | phosphoserine phosphatase           | 223  | 4.00E-57  | COG0560 | E  |
| ZMO1138 | 1154660 | 1155598 | 2  | 939  | Q9X5G1 JMA  | tRNA delta(2)-isopentenylpyroph     | 613  | 1.00E-174 | COG0324 | J  |
| ZMO1139 | 1155752 | 1157539 | 2  | 1788 | NP_773143   | acetolactate synthase large subu    | 723  | 0         | COG0028 | EH |
| ZMO1140 | 1157561 | 1158073 | 2  | 513  | NP_947377   | acetolactate synthase small subu    | 192  | 2.00E-48  | COG0440 | E  |
| ZMO1141 | 1158119 | 1159138 | 2  | 1020 | Q9X5F8 JLVC | ketol-acyl reductoisomerase (act    | 669  | 0         | COG0059 | EH |
| ZMO1142 | 1160805 | 1159855 | -1 | 951  | NP_774020   | thioredoxin reductase               | 397  | 1.00E-109 | COG0492 | O  |
| ZMO1143 | 1161770 | 1161123 | -3 | 648  | NP_346876   | chloramphenicol acetyltransferas    | 114  | 2.00E-24  | COG4845 | V  |
| ZMO1144 | 1162199 | 1161852 | -3 | 348  | ZP_0009434  | conserved hypothetical protein      | 83.2 | 9.00E-16  | -       | -  |
| ZMO1145 | 1162486 | 1162265 | -2 | 222  | ZP_0009406  | ribosomal protein L31               | 118  | 2.00E-26  | COG0254 | J  |
| ZMO1146 | 1163091 | 1162621 | -1 | 471  | Q9X5F5 FAB  | (3R)-hydroxymyristoyl-[acyl carri   | 307  | 4.00E-83  | COG0764 | I  |
| ZMO1147 | 1163769 | 1163104 | -1 | 666  | ZP_0009406  | conserved hypothetical protein      | 105  | 7.00E-22  | COG2825 | M  |
| ZMO1148 | 1166939 | 1163775 | -3 | 3165 | ZP_0009406  | outer membrane protein              | 968  | 0         | COG4775 | M  |
| ZMO1149 | 1168021 | 1167131 | -2 | 891  | ZP_0009405  | predicted membrane-associated       | 355  | 9.00E-97  | COG0750 | M  |
| ZMO1150 | 1169418 | 1168258 | -1 | 1161 | AAD29659    | 1-deoxy-D-xylulose 5-phosphate      | 756  | 0         | COG0743 | I  |
| ZMO1151 | 1170047 | 1169424 | -3 | 624  | ZP_0005334  | CDP-diglyceride synthetase          | 169  | 3.00E-41  | COG0575 | I  |
| ZMO1152 | 1170712 | 1170050 | -2 | 663  | NP_948259   | undecaprenyl pyrophosphate syr      | 268  | 6.00E-71  | COG0020 | I  |
| ZMO1153 | 1171344 | 1170793 | -1 | 552  | Q9X5F0 RRF  | ribosome recycling factor (riboso   | 358  | 2.00E-98  | COG0233 | J  |

|         |         |         |    |      |             |                                     |      |           |         |      |
|---------|---------|---------|----|------|-------------|-------------------------------------|------|-----------|---------|------|
| ZMO1154 | 1172078 | 1171350 | -3 | 729  | Q9X5E9 PYF  | uridylylate kinase (UK) (uridine m  | 475  | 1.00E-133 | COG0528 | F    |
| ZMO1155 | 1173132 | 1172215 | -1 | 918  | Q9X5E8 EFT  | translation elongation factor Ts (t | 575  | 1.00E-163 | COG0264 | J    |
| ZMO1156 | 1173992 | 1173246 | -3 | 747  | Q9X5E7 RS2  | ribosomal protein S2                | 498  | 1.00E-140 | COG0052 | J    |
| ZMO1157 | 1174250 | 1174597 | 2  | 348  |             | hypothetical protein                | -    | -         | -       | -    |
| ZMO1158 | 1174638 | 1175336 | 3  | 699  | AAD29652    | aspartate racemase                  | 454  | 1.00E-127 | COG1794 | M    |
| ZMO1159 | 1176288 | 1175494 | -1 | 795  | NP_770437   | phosphatidylserine synthase         | 206  | 3.00E-52  | COG1183 | I    |
| ZMO1160 | 1177025 | 1176291 | -3 | 735  | Q9X5E3 PSC  | phosphatidylserine decarboxylas     | 464  | 1.00E-130 | COG0688 | I    |
| ZMO1161 | 1177223 | 1177080 | -3 | 144  |             | hypothetical protein                | -    | -         | -       | -    |
| ZMO1162 | 1177232 | 1178497 | 2  | 1266 | NP_767730   | two-component sensor histidine l    | 210  | 4.00E-53  | COG0642 | T    |
| ZMO1163 | 1178704 | 1179417 | 1  | 714  | Q9X5E1 PHC  | phosphate transport system prot     | 457  | 1.00E-128 | COG0704 | P    |
| ZMO1164 | 1179417 | 1180112 | 3  | 696  | AAD29647    | phosphate regulon response reg      | 459  | 1.00E-128 | COG0745 | TK   |
| ZMO1165 | 1181040 | 1180201 | -1 | 840  | ZP_0009393  | amidophosphoribosyltransferase      | 166  | 5.00E-40  | COG1040 | R    |
| ZMO1166 | 1182137 | 1181124 | -3 | 1014 | AAM50050    | RecA/RadA recombinase A             | 652  | 0         | COG0468 | L    |
| ZMO1167 | 1184355 | 1182406 | -1 | 1950 | NP_642657   | glutaryl-7-ACA acylase precursor    | 792  | 0         | COG2936 | R    |
| ZMO1168 | 1184519 | 1184418 | -3 | 102  |             | hypothetical protein                | -    | -         | -       | -    |
| ZMO1169 | 1184558 | 1185418 | 2  | 861  | NP_107610   | conserved hypothetical protein      | 249  | 3.00E-65  | COG2971 | G    |
| ZMO1170 | 1185465 | 1185773 | 3  | 309  |             | hypothetical protein                | -    | -         | -       | -    |
| ZMO1171 | 1186801 | 1185773 | -2 | 1029 | NP_420813   | glycosyl hydrolase                  | 283  | 5.00E-75  | COG1472 | G    |
| ZMO1172 | 1186930 | 1188204 | 1  | 1275 | NP_419401   | succinylarginine dihydrolase        | 439  | 1.00E-122 | COG3724 | E    |
| ZMO1173 | 1192367 | 1188204 | -3 | 4164 | ZP_0009435  | conserved hypothetical protein      | 363  | 2.00E-98  | COG2911 | S    |
| ZMO1174 | 1194583 | 1192373 | -2 | 2211 | ZP_0009435  | outer membrane protein              | 414  | 1.00E-114 | COG0729 | M    |
| ZMO1175 | 1195605 | 1194589 | -1 | 1017 | ZP_0008808  | two-component signal transducti     | 221  | 2.00E-56  | COG0642 | T    |
| ZMO1176 | 1195921 | 1195664 | -2 | 258  |             | hypothetical protein                | -    | -         | -       | -    |
| ZMO1177 | 1196721 | 1196002 | -1 | 720  | NP_948908   | two-component transcriptional re    | 213  | 2.00E-54  | COG0745 | TK   |
| ZMO1178 | 1197123 | 1196755 | -1 | 369  | Q9X3W1 HIS  | phosphoribosyl-AMP cyclohydrol      | 259  | 9.00E-69  | COG0139 | E    |
| ZMO1179 | 1198371 | 1197184 | -1 | 1188 | NP_697466   | RNA methyltransferase, putative     | 228  | 2.00E-58  | COG2265 | J    |
| ZMO1180 | 1199822 | 1198374 | -3 | 1449 | ZP_0009488  | sugar kinase                        | 319  | 8.00E-86  | COG0063 | G    |
| ZMO1181 | 1200918 | 1200187 | -1 | 732  | ZP_0009488  | N-formylglutamate amidohydrola      | 188  | 7.00E-47  | COG3931 | E    |
| ZMO1182 | 1201927 | 1201085 | -2 | 843  | NP_769166   | 4-diphosphocytidyl-2-C-methyl-D     | 181  | 1.00E-44  | COG1947 | I    |
| ZMO1183 | 1203865 | 1202228 | -2 | 1638 | NP_420148   | TPR domain protein                  | 148  | 3.00E-34  | COG0457 | R    |
| ZMO1184 | 1205638 | 1203989 | -2 | 1650 | NP_420147   | electrotransfer ubiquinone oxidor   | 668  | 0         | COG0644 | C    |
| ZMO1185 | 1205936 | 1206730 | 2  | 795  | NP_420146   | phage SPO1 DNA polymerase-rt        | 68   | 2.00E-10  | COG1573 | L    |
| ZMO1186 | 1207593 | 1208645 | 3  | 1053 | ZP_0009487  | soluble lytic murein transglycosyl  | 407  | 1.00E-112 | COG0741 | M    |
| ZMO1187 | 1209466 | 1208660 | -2 | 807  | Q9X3X1 FPC  | formamidopyrimidine-DNA glyco:      | 542  | 1.00E-153 | COG0266 | L    |
| ZMO1188 | 1209779 | 1210507 | 2  | 729  | AAD21548    | ubiquinone methyltransferase        | 486  | 1.00E-136 | COG2226 | H    |
| ZMO1189 | 1210511 | 1212049 | 2  | 1539 | NP_700227   | ubiquinone biosynthesis protein l   | 382  | 1.00E-104 | COG0661 | R    |
| ZMO1190 | 1212076 | 1213329 | 1  | 1254 | NP_700226   | phosphopantothenoylecysteine sy     | 397  | 1.00E-109 | COG0452 | H    |
| ZMO1191 | 1213361 | 1213801 | 2  | 441  | Q9X3X5 DUT  | deoxyuridine 5'-triphosphate nuc    | 290  | 7.00E-78  | COG0756 | F    |
| ZMO1192 | 1213798 | 1214556 | 1  | 759  | AAD21552    | molybdopterin biosynthesis prote    | 484  | 1.00E-136 | COG0476 | H    |
| ZMO1193 | 1218615 | 1214968 | -1 | 3648 | NP_421254   | DNA topoisomerase I                 | 768  | 0         | COG0550 | L    |
| ZMO1194 | 1219909 | 1218758 | -2 | 1152 | ZP_0009490  | nucleotide-binding protein involv   | 339  | 5.00E-92  | COG0758 | LU   |
| ZMO1195 | 1220615 | 1219965 | -3 | 651  | NP_699785   | membrane protein, putative          | 191  | 1.00E-47  | COG0344 | S    |
| ZMO1196 | 1220894 | 1222306 | 2  | 1413 | ZP_0003377  | permease, multidrug resistance p    | 426  | 1.00E-118 | COG0477 | GEPR |
| ZMO1197 | 1222331 | 1223161 | 2  | 831  | AAD21556    | glutamate racemase                  | 392  | 1.00E-108 | COG0796 | M    |
| ZMO1198 | 1223471 | 1224511 | 2  | 1041 | P18079 HEM  | aminolevulinic acid synthase        | 499  | 1.00E-140 | COG0156 | H    |
| ZMO1199 | 1224533 | 1224694 | 2  | 162  |             | hypothetical protein                | -    | -         | -       | -    |
| ZMO1200 | 1224730 | 1225203 | 1  | 474  | ZP_0009302  | ribose 5-phosphate isomerase        | 198  | 2.00E-50  | COG0698 | G    |
| ZMO1201 | 1225223 | 1226512 | 2  | 1290 | ZP_0000698  | glycine/serine hydroxymethyltran    | 580  | 1.00E-164 | COG0112 | E    |
| ZMO1202 | 1226466 | 1226987 | 3  | 522  | ZP_0001609  | transcriptional regulator, predicte | 197  | 9.00E-50  | COG1327 | K    |
| ZMO1203 | 1226984 | 1227715 | 2  | 732  | ZP_0009455  | rRNA methylase                      | 337  | 2.00E-91  | COG0565 | J    |
| ZMO1204 | 1228034 | 1227846 | -3 | 189  |             | hypothetical protein                | -    | -         | -       | -    |
| ZMO1205 | 1228405 | 1228094 | -2 | 312  |             | hypothetical protein                | -    | -         | -       | -    |
| ZMO1206 | 1229845 | 1228901 | -2 | 945  | ZP_0008821  | transcriptional regulator           | 200  | 4.00E-50  | COG0583 | K    |
| ZMO1207 | 1229918 | 1230907 | 2  | 990  | NP_887662   | nitrilase                           | 339  | 4.00E-92  | COG0388 | R    |
| ZMO1208 | 1231577 | 1231257 | -3 | 321  |             | hypothetical protein                | -    | -         | -       | -    |
| ZMO1209 | 1233793 | 1231841 | -2 | 1953 | ZP_0009407  | K+ transporter                      | 740  | 0         | COG3158 | P    |
| ZMO1210 | 1234087 | 1233848 | -2 | 240  |             | hypothetical protein                | -    | -         | -       | -    |
| ZMO1211 | 1235606 | 1234266 | -3 | 1341 | ZP_0009417  | pyruvate/2-oxoglutarate dehydro     | 507  | 1.00E-142 | COG1249 | C    |
| ZMO1212 | 1237292 | 1235775 | -3 | 1518 | P28718 G6PI | glucose-6-phosphate isomerase       | 1003 | 0         | COG0166 | G    |
| ZMO1213 | 1237660 | 1238052 | 1  | 393  | ZP_0009363  | conserved hypothetical protein      | 75.5 | 6.00E-13  | -       | -    |
| ZMO1214 | 1238222 | 1239700 | 2  | 1479 | ZP_0009363  | DNA and RNA helicases superfa       | 548  | 1.00E-154 | COG0513 | LKJ  |
| ZMO1215 | 1240045 | 1240257 | 1  | 213  |             | hypothetical protein                | -    | -         | -       | -    |
| ZMO1216 | 1240284 | 1241936 | 3  | 1653 | ZP_0000794  | two-component signal transducti     | 99   | 2.00E-19  | COG3920 | T    |
| ZMO1217 | 1242626 | 1242243 | -3 | 384  |             | hypothetical protein                | -    | -         | -       | -    |
| ZMO1218 | 1244383 | 1243601 | -2 | 783  | ZP_0009409  | Sec-independent protein secretic    | 289  | 3.00E-77  | COG0805 | U    |
| ZMO1219 | 1244838 | 1244386 | -1 | 453  | ZP_0009409  | Sec-independent protein secretic    | 113  | 1.00E-24  | COG1826 | U    |
| ZMO1220 | 1245186 | 1244929 | -1 | 258  | ZP_0009409  | Sec-independent protein secretic    | 84   | 6.00E-16  | COG1826 | U    |
| ZMO1221 | 1246040 | 1245345 | -3 | 696  | ZP_0009410  | conserved hypothetical protein      | 160  | 3.00E-38  | -       | -    |
| ZMO1222 | 1246890 | 1246159 | -1 | 732  | ZP_0001429  | dehydrogenases with different sp    | 310  | 1.00E-83  | COG1028 | IQR  |
| ZMO1223 | 1247895 | 1246966 | -1 | 930  | ZP_0009506  | (acyl-carrier-protein) S-malonyltr  | 374  | 1.00E-102 | COG0331 | I    |
| ZMO1224 | 1247925 | 1248059 | 3  | 135  |             | hypothetical protein                | -    | -         | -       | -    |
| ZMO1225 | 1248419 | 1248793 | 2  | 375  | ZP_0009507  | ribosomal protein S6                | 169  | 1.00E-41  | COG0360 | J    |
| ZMO1226 | 1248814 | 1249038 | 1  | 225  | ZP_0009507  | ribosomal protein S18               | 137  | 4.00E-32  | COG0238 | J    |
| ZMO1227 | 1249053 | 1249682 | 3  | 630  | ZP_0009508  | ribosomal protein L9                | 248  | 7.00E-65  | COG0359 | J    |
| ZMO1228 | 1250754 | 1249765 | -1 | 990  | NP_421907   | mandelate racemase/muconate l       | 301  | 1.00E-80  | COG4948 | MR   |
| ZMO1229 | 1251504 | 1250848 | -1 | 657  | ZP_0009509  | GTP cyclohydrolase I                | 275  | 4.00E-73  | COG0302 | H    |
| ZMO1230 | 1251496 | 1251678 | 1  | 183  |             | hypothetical protein                | -    | -         | -       | -    |



|         |         |         |    |      |            |                                     |      |           |         |      |
|---------|---------|---------|----|------|------------|-------------------------------------|------|-----------|---------|------|
| ZMO1231 | 1251782 | 1253359 | 2  | 1578 | ZP_0009458 | single-stranded DNA-specific ex     | 608  | 1.00E-173 | COG0608 | L    |
| ZMO1232 | 1253711 | 1255036 | 2  | 1326 | ZP_0009459 | glycosyltransferase                 | 278  | 1.00E-73  | COG0438 | M    |
| ZMO1233 | 1256495 | 1255089 | -3 | 1407 | ZP_0005580 | mannose-6-phosphate isomeras        | 496  | 1.00E-139 | COG0836 | M    |
| ZMO1234 | 1258496 | 1256553 | -3 | 1944 | ZP_0009646 | deoxyxylulose-5-phosphate synt      | 894  | 0         | COG1154 | HI   |
| ZMO1235 | 1259159 | 1258680 | -3 | 480  | ZP_0009645 | transcriptional regulator, Fe2+/Zr  | 187  | 6.00E-47  | COG0735 | P    |
| ZMO1236 | 1260419 | 1259412 | -3 | 1008 | P20368 ADH | alcohol dehydrogenase I (ADH I)     | 673  | 0         | COG1064 | R    |
| ZMO1237 | 1262116 | 1261127 | -2 | 990  | ZP_0010650 | D-lactate dehydrogenase             | 346  | 3.00E-94  | COG1052 | CHR  |
| ZMO1238 | 1262094 | 1262210 | 3  | 117  |            | hypothetical protein                |      |           |         |      |
| ZMO1239 | 1262273 | 1262383 | 2  | 111  |            | hypothetical protein                |      |           |         |      |
| ZMO1240 | 1263272 | 1262592 | -3 | 681  | P30798 GPM | phosphoglycerate mutase             | 470  | 1.00E-131 | COG0588 | G    |
| ZMO1241 | 1263379 | 1263516 | 1  | 138  |            | hypothetical protein                |      |           |         |      |
| ZMO1242 | 1264664 | 1263528 | -3 | 1137 | ZP_0009674 | carboxypeptidase, predicted         | 466  | 1.00E-130 | COG2866 | E    |
| ZMO1243 | 1265473 | 1264667 | -2 | 807  | A40649     | conserved hypothetical protein      | 538  | 1.00E-152 | -       | -    |
| ZMO1244 | 1265495 | 1265620 | 2  | 126  |            | hypothetical protein                |      |           |         |      |
| ZMO1245 | 1265601 | 1265738 | 3  | 138  |            | hypothetical protein                |      |           |         |      |
| ZMO1246 | 1265756 | 1265881 | 2  | 126  | ZP_0009674 | ribosomal protein L36               | 75.9 | 2.00E-13  | COG0257 | J    |
| ZMO1247 | 1266432 | 1266554 | 3  | 123  |            | hypothetical protein                |      |           |         |      |
| ZMO1248 | 1267076 | 1266594 | -3 | 483  |            | hypothetical protein                |      |           |         |      |
| ZMO1249 | 1267617 | 1267372 | -1 | 246  |            | hypothetical protein                |      |           |         |      |
| ZMO1250 | 1267942 | 1267760 | -2 | 183  |            | hypothetical protein                |      |           |         |      |
| ZMO1251 | 1268527 | 1268045 | -2 | 483  |            | hypothetical protein                |      |           |         |      |
| ZMO1252 | 1269200 | 1268565 | -3 | 636  | ZP_0009407 | cytochrome c biogenesis factor      | 124  | 1.00E-27  | COG4235 | O    |
| ZMO1253 | 1269625 | 1269203 | -2 | 423  | ZP_0009407 | cytochrome c biogenesis protein     | 116  | 9.00E-26  | COG3088 | O    |
| ZMO1254 | 1270062 | 1269628 | -1 | 435  | NP_642006  | cytochrome c biogenesis protein     | 110  | 5.00E-24  | COG0526 | OC   |
| ZMO1255 | 1272095 | 1270155 | -3 | 1941 | ZP_0009407 | cytochrome c biogenesis factor      | 651  | 0         | COG1138 | O    |
| ZMO1256 | 1272537 | 1272103 | -1 | 435  | ZP_0009407 | cytochrome c biogenesis protein     | 134  | 2.00E-31  | COG2332 | O    |
| ZMO1257 | 1272725 | 1272567 | -3 | 159  |            | hypothetical protein                |      |           |         |      |
| ZMO1258 | 1273438 | 1272728 | -2 | 711  | ZP_0009407 | ABC-type transport system invol     | 294  | 1.00E-78  | COG0755 | O    |
| ZMO1259 | 1273598 | 1273726 | 2  | 129  |            | hypothetical protein                |      |           |         |      |
| ZMO1260 | 1274039 | 1276291 | 2  | 2253 | ZP_0008646 | TonB-dependent receptor, outer      | 609  | 1.00E-173 | COG1629 | P    |
| ZMO1261 | 1276477 | 1277535 | 1  | 1059 | ZP_0008991 | ABC-type nitrate/sulfonate/bicart   | 205  | 1.00E-51  | COG0715 | P    |
| ZMO1262 | 1277480 | 1278313 | 2  | 834  | ZP_0011122 | ABC-type nitrate/sulfonate/bicart   | 268  | 7.00E-71  | COG0600 | P    |
| ZMO1263 | 1278314 | 1279036 | 2  | 723  | ZP_0012667 | ABC-type nitrate/sulfonate/bicart   | 270  | 2.00E-71  | COG1116 | P    |
| ZMO1264 | 1279074 | 1280255 | 3  | 1182 | NP_462733  | putative mandelate racemase         | 446  | 1.00E-124 | COG4948 | MR   |
| ZMO1265 | 1280266 | 1280922 | 1  | 657  | ZP_0009814 | metal-binding protein conserved     | 247  | 1.00E-64  | COG4887 | R    |
| ZMO1266 | 1280950 | 1281168 | 1  | 219  |            | hypothetical protein                |      |           |         |      |
| ZMO1267 | 1281143 | 1282723 | 2  | 1581 | ZP_0009515 | GMP synthase - glutamine amid       | 852  | 0         | COG0519 | F    |
| ZMO1268 | 1283840 | 1282803 | -3 | 1038 | ZP_0009358 | conserved hypothetical protein      | 152  | 1.00E-35  | -       | -    |
| ZMO1269 | 1284416 | 1284045 | -3 | 372  | ZP_0009450 | conserved hypothetical protein      | 92.8 | 1.00E-18  | -       | -    |
| ZMO1270 | 1284395 | 1285606 | 2  | 1212 | BAB56013   | serine palmitoyltransferase         | 599  | 1.00E-170 | COG0156 | H    |
| ZMO1271 | 1286600 | 1285740 | -3 | 861  | ZP_0009598 | siroheme synthase (precorrin-2 c    | 210  | 3.00E-53  | COG0007 | H    |
| ZMO1272 | 1286815 | 1288245 | 1  | 1431 | ZP_0009388 | NAD-dependent aldehyde dehyd        | 560  | 1.00E-158 | COG1012 | C    |
| ZMO1273 | 1289875 | 1288298 | -2 | 1578 | ZP_0009409 | metal-dependent hydrolase, prec     | 381  | 1.00E-104 | COG1574 | R    |
| ZMO1274 | 1290066 | 1289965 | -1 | 102  |            | hypothetical protein                |      |           |         |      |
| ZMO1275 | 1290233 | 1291471 | 2  | 1239 | ZP_0009434 | threonine dehydratase               | 473  | 1.00E-132 | COG1171 | E    |
| ZMO1276 | 1291504 | 1291743 | 1  | 240  |            | hypothetical protein                |      |           |         |      |
| ZMO1277 | 1292945 | 1291950 | -3 | 996  | NP_420489  | conserved hypothetical protein      | 234  | 1.00E-60  | COG1559 | R    |
| ZMO1278 | 1294247 | 1292955 | -3 | 1293 | ZP_0009467 | 3-oxoacyl-(acyl-carrier-protein) s  | 615  | 1.00E-175 | COG0304 | IQ   |
| ZMO1279 | 1294637 | 1294407 | -3 | 231  | ZP_0009467 | acyl carrier protein                | 130  | 5.00E-30  | COG0236 | IQ   |
| ZMO1280 | 1294413 | 1294688 | 3  | 276  | ZP_0009467 | acyl carrier protein                | 129  | 2.00E-29  | COG0236 | IQ   |
| ZMO1281 | 1294828 | 1294977 | 1  | 150  |            | hypothetical protein                |      |           |         |      |
| ZMO1282 | 1295081 | 1295200 | 2  | 120  |            | hypothetical protein                |      |           |         |      |
| ZMO1283 | 1295281 | 1296321 | 1  | 1041 | NP_420858  | transcriptional regulator, Lacl fan | 296  | 6.00E-79  | COG1609 | K    |
| ZMO1284 | 1297783 | 1296347 | -2 | 1437 | BAA92379   | sorbitol dehydrogenase cytochro     | 492  | 1.00E-138 | COG2010 | C    |
| ZMO1285 | 1299413 | 1297782 | -3 | 1632 | BAA92378   | sorbitol dehydrogenase large su     | 909  | 0         | COG2303 | E    |
| ZMO1286 | 1300025 | 1299438 | -3 | 588  | BAA92377   | sorbitol dehydrogenase small su     | 121  | 9.00E-27  | -       | -    |
| ZMO1287 | 1301565 | 1300477 | -1 | 1089 | NP_279218  | LPS glycosyltransferase; Lpg        | 108  | 2.00E-22  | COG0438 | M    |
| ZMO1288 | 1301964 | 1303085 | 3  | 1122 | ZP_0012750 | permeases of the major facilitato   | 347  | 2.00E-94  | COG0477 | GEPR |
| ZMO1289 | 1303438 | 1303196 | -2 | 243  | NP_639383  | transglycosylase associated prot    | 85.1 | 3.00E-16  | COG2261 | S    |
| ZMO1290 | 1303544 | 1303660 | 2  | 117  |            | hypothetical protein                |      |           |         |      |
| ZMO1291 | 1305242 | 1303638 | -3 | 1605 | NP_294688  | carboxypeptidase-related protein    | 331  | 3.00E-89  | COG2939 | E    |
| ZMO1292 | 1305858 | 1305700 | -1 | 159  |            | hypothetical protein                |      |           |         |      |
| ZMO1293 | 1305786 | 1305932 | 3  | 147  |            | hypothetical protein                |      |           |         |      |
| ZMO1294 | 1305913 | 1306866 | 1  | 954  | ZP_0005200 | sugar phosphate isomerase, put      | 290  | 3.00E-77  | COG2103 | R    |
| ZMO1295 | 1306863 | 1307516 | 3  | 654  | ZP_0002310 | organic radical activating enzym    | 243  | 2.00E-63  | COG0602 | O    |
| ZMO1296 | 1310084 | 1309335 | -3 | 750  |            | hypothetical protein                |      |           |         |      |
| ZMO1297 | 1310218 | 1310544 | 1  | 327  |            | hypothetical protein                |      |           |         |      |
| ZMO1298 | 1310721 | 1313138 | 3  | 2418 | ZP_0002744 | outer membrane receptor protein     | 666  | 0         | COG1629 | P    |
| ZMO1299 | 1314028 | 1315653 | 1  | 1626 | BAB72034   | capsular polysaccharide biosynt     | 358  | 1.00E-97  | -       | -    |
| ZMO1300 | 1315650 | 1316372 | 3  | 723  | BAB72033   | capsular polysaccharide biosynt     | 240  | 2.00E-62  | -       | -    |
| ZMO1301 | 1317488 | 1316406 | -3 | 1083 | NP_229885  | conserved hypothetical protein      | 65.5 | 2.00E-09  | -       | -    |
| ZMO1302 | 1317728 | 1318378 | 2  | 651  | NP_541656  | lipote-protein ligase B             | 240  | 1.00E-62  | COG0321 | H    |
| ZMO1303 | 1319356 | 1318508 | -2 | 849  | ZP_0009486 | pyrroline-5-carboxylate reductas    | 216  | 3.00E-55  | COG0345 | E    |
| ZMO1304 | 1319916 | 1319413 | -1 | 504  | ZP_0009486 | conserved hypothetical protein      | 190  | 8.00E-48  | COG5465 | S    |
| ZMO1305 | 1320260 | 1320051 | -3 | 210  | ZP_0009395 | conserved hypothetical protein      | 72.8 | 2.00E-12  | COG2960 | S    |
| ZMO1306 | 1321215 | 1320472 | -1 | 744  | ZP_0009394 | rRNA methylase, predicted           | 300  | 2.00E-80  | COG1189 | J    |
| ZMO1307 | 1321511 | 1323034 | 2  | 1524 | NP_641794  | fumarate hydratase                  | 687  | 0         | COG1951 | C    |

|         |         |         |    |      |            |                                     |      |           |         |      |
|---------|---------|---------|----|------|------------|-------------------------------------|------|-----------|---------|------|
| ZMO1308 | 1323570 | 1323130 | -1 | 441  | ZP_0009439 | DNA polymerase III, chi subunit     | 110  | 5.00E-24  | COG2927 | L    |
| ZMO1309 | 1325081 | 1323588 | -3 | 1494 | ZP_0009439 | leucyl aminopeptidase               | 533  | 1.00E-150 | COG0260 | E    |
| ZMO1310 | 1325287 | 1325186 | -2 | 102  |            | hypothetical protein                |      |           |         |      |
| ZMO1311 | 1325487 | 1327778 | 3  | 2292 | ZP_0009439 | organic solvent tolerance protein   | 656  | 0         | COG1452 | M    |
| ZMO1312 | 1327897 | 1329312 | 1  | 1416 | ZP_0009439 | peptidyl-prolyl isomerase           | 414  | 1.00E-114 | COG0760 | O    |
| ZMO1313 | 1329354 | 1330361 | 3  | 1008 | ZP_0009439 | pyridoxal phosphate biosynthesis    | 323  | 2.00E-87  | COG1995 | H    |
| ZMO1314 | 1330372 | 1331208 | 1  | 837  | ZP_0009439 | dimethyladenosine transferase (r    | 330  | 1.00E-89  | COG0030 | J    |
| ZMO1315 | 1332086 | 1331223 | -3 | 864  | NP_708800  | conserved hypothetical protein      | 136  | 4.00E-31  | -       | -    |
| ZMO1316 | 1333437 | 1332109 | -1 | 1329 | NP_755591  | conserved hypothetical protein      | 366  | 1.00E-100 | COG2244 | R    |
| ZMO1317 | 1334293 | 1333529 | -2 | 765  | NP_417458  | conserved hypothetical protein      | 185  | 1.00E-45  | -       | -    |
| ZMO1318 | 1335020 | 1334304 | -3 | 717  | NP_417460  | conserved hypothetical protein      | 185  | 8.00E-46  | -       | -    |
| ZMO1319 | 1336153 | 1335530 | -2 | 624  | ZP_0009334 | FOG: TPR repeat                     | 106  | 4.00E-22  | -       | -    |
| ZMO1320 | 1337555 | 1336329 | -3 | 1227 | ZP_0009334 | tRNA and rRNA cytosine-C5-met       | 351  | 2.00E-95  | COG0144 | J    |
| ZMO1321 | 1339042 | 1337591 | -2 | 1452 | ZP_0009334 | IMP dehydrogenase/GMP reduct        | 757  | 0         | COG0516 | F    |
| ZMO1322 | 1339322 | 1340029 | 2  | 708  | NP_105817  | two-component system response       | 302  | 4.00E-81  | COG0745 | TK   |
| ZMO1323 | 1339998 | 1341635 | 3  | 1638 | ZP_0009636 | two-component signal transducti     | 429  | 1.00E-119 | COG0642 | T    |
| ZMO1324 | 1341778 | 1342269 | 1  | 492  | ZP_0005483 | Serine kinase of the HPr protein,   | 110  | 1.00E-23  | COG1493 | T    |
| ZMO1325 | 1342292 | 1343263 | 2  | 972  | ZP_0009636 | predicted P-loop-containing kina    | 310  | 3.00E-83  | COG1660 | R    |
| ZMO1326 | 1343271 | 1343675 | 3  | 405  | ZP_0009636 | PTS system, mannose/fructose-       | 187  | 3.00E-47  | COG2893 | G    |
| ZMO1327 | 1343672 | 1343944 | 2  | 273  | NP_945707  | PTS system phosphocarrier prot      | 92.4 | 2.00E-18  | COG1925 | G    |
| ZMO1328 | 1343962 | 1344768 | 1  | 807  | ZP_0009636 | tRNA methylases                     | 327  | 1.00E-88  | COG0566 | J    |
| ZMO1329 | 1344821 | 1345597 | 2  | 777  | ZP_0009551 | sugar kinase, predicted             | 282  | 5.00E-75  | COG0061 | G    |
| ZMO1330 | 1345840 | 1345703 | -2 | 138  |            | hypothetical protein                |      |           |         | -    |
| ZMO1331 | 1345922 | 1348732 | 2  | 2811 | ZP_0003468 | small-conductance mechanosen:       | 355  | 3.00E-96  | COG0668 | M    |
| ZMO1332 | 1348878 | 1348991 | 3  | 114  |            | hypothetical protein                |      |           |         | -    |
| ZMO1333 | 1349451 | 1349335 | -1 | 117  |            | hypothetical protein                |      |           |         | -    |
| ZMO1334 | 1349455 | 1350069 | 1  | 615  | ZP_0005101 | conserved hypothetical protein      | 148  | 6.00E-35  | COG2353 | S    |
| ZMO1335 | 1350349 | 1350951 | 1  | 603  | ZP_0010091 | flavodoxin WrbA, multimeric         | 282  | 3.00E-75  | COG0655 | R    |
| ZMO1336 | 1352000 | 1351095 | -3 | 906  | NP_900952  | transcriptional regulator           | 275  | 6.00E-73  | COG0583 | K    |
| ZMO1337 | 1352135 | 1352842 | 2  | 708  | NP_420285  | conserved hypothetical protein      | 294  | 9.00E-79  | COG1741 | R    |
| ZMO1338 | 1353457 | 1352849 | -2 | 609  | NP_883746  | efflux protein, LysE family         | 210  | 2.00E-53  | COG1280 | E    |
| ZMO1339 | 1353459 | 1353569 | 3  | 111  |            | hypothetical protein                |      |           |         | -    |
| ZMO1340 | 1354842 | 1354639 | -3 | 204  | ZP_0003122 | permeases of the major facilitato   | 438  | 1.00E-121 | COG0477 | GEPR |
| ZMO1341 | 1356088 | 1355504 | -2 | 585  | ZP_0009334 | metalloprotease                     | 134  | 1.00E-30  | COG2321 | R    |
| ZMO1342 | 1356194 | 1356081 | -3 | 114  |            | hypothetical protein                |      |           |         | -    |
| ZMO1343 | 1356815 | 1356714 | -3 | 102  |            | hypothetical protein                |      |           |         | -    |
| ZMO1344 | 1356974 | 1357822 | 2  | 849  | NP_691310  | 2,5-diketo-D-gluconate reductase    | 371  | 1.00E-102 | COG0656 | R    |
| ZMO1345 | 1360546 | 1357949 | -2 | 2598 | NP_251773  | aminopeptidase N                    | 803  | 0         | COG0308 | E    |
| ZMO1346 | 1361570 | 1360620 | -3 | 951  | ZP_0009560 | permeases of the drug/metabolit     | 209  | 8.00E-53  | COG0697 | GER  |
| ZMO1347 | 1362621 | 1361614 | -1 | 1008 | AAD42401   | threonine aldolase                  | 670  | 0         | COG2008 | E    |
| ZMO1348 | 1363517 | 1362693 | -3 | 825  | AAD42400   | methionine aminopeptidase           | 565  | 1.00E-160 | COG0024 | J    |
| ZMO1349 | 1363639 | 1363532 | -2 | 108  |            | hypothetical protein                |      |           |         | -    |
| ZMO1350 | 1363633 | 1364394 | 1  | 762  | ZP_0009627 | nucleotide-utilizing enzyme (rela   | 309  | 4.00E-83  | COG1058 | R    |
| ZMO1351 | 1364407 | 1365411 | 1  | 1005 | NP_103069  | carboxymethylenebutenolidase,       | 166  | 8.00E-40  | COG0412 | Q    |
| ZMO1352 | 1366204 | 1365506 | -2 | 699  | ZP_0009486 | integral membrane protein           | 300  | 2.00E-80  | COG0670 | R    |
| ZMO1353 | 1367020 | 1366466 | -2 | 555  | ZP_0003156 | conserved hypothetical protein      | 162  | 2.00E-39  | COG4702 | S    |
| ZMO1354 | 1367980 | 1367210 | -2 | 771  | ZP_0005639 | outer membrane protein and rela     | 206  | 6.00E-52  | COG2885 | M    |
| ZMO1355 | 1370585 | 1368726 | -3 | 1860 | ZP_0009466 | ABC transporters with duplicated    | 750  | 0         | COG0488 | R    |
| ZMO1356 | 1372134 | 1370686 | -1 | 1449 | ZP_0000456 | chromosomal replication initiator   | 400  | 1.00E-110 | COG0593 | L    |
| ZMO1357 | 1372549 | 1372800 | 1  | 252  |            | hypothetical protein                |      |           |         | -    |
| ZMO1358 | 1373064 | 1372807 | -1 | 258  | Q9Z5V0 RS2 | ribosomal protein S20               | 167  | 6.00E-41  | COG0268 | J    |
| ZMO1359 | 1373148 | 1373264 | 3  | 117  |            | hypothetical protein                |      |           |         | -    |
| ZMO1360 | 1375108 | 1373408 | -2 | 1701 | P06672 DCP | pyruvate decarboxylase (PDC)        | 1135 | 0         | COG3961 | GHR  |
| ZMO1361 | 1375371 | 1375189 | -1 | 183  |            | hypothetical protein                |      |           |         | -    |
| ZMO1362 | 1375645 | 1375361 | -2 | 285  |            | hypothetical protein                |      |           |         | -    |
| ZMO1363 | 1375810 | 1376031 | 1  | 222  |            | hypothetical protein                |      |           |         | -    |
| ZMO1364 | 1376059 | 1377420 | 1  | 1362 | AAD19712   | oxygen-independent (anaerobic)      | 846  | 0         | COG0635 | H    |
| ZMO1365 | 1379200 | 1380891 | 1  | 1692 | NP_638679  | conserved hypothetical protein      | 233  | 2.00E-59  | COG2199 | T    |
| ZMO1366 | 1381072 | 1381686 | 1  | 615  | Q9Z5U7 RS4 | ribosomal protein S4                | 411  | 1.00E-114 | COG0522 | J    |
| ZMO1367 | 1381820 | 1382059 | 2  | 240  |            | hypothetical protein                |      |           |         | -    |
| ZMO1368 | 1382061 | 1381954 | -1 | 108  |            | hypothetical protein                |      |           |         | -    |
| ZMO1369 | 1382194 | 1383174 | 1  | 981  | ZP_0009468 | peptidylarginine deiminase and r    | 323  | 4.00E-87  | COG2957 | E    |
| ZMO1370 | 1383186 | 1384034 | 3  | 849  | NP_924628  | hydrolase, hydratase                | 371  | 1.00E-102 | COG0388 | R    |
| ZMO1371 | 1384172 | 1384008 | -3 | 165  |            | hypothetical protein                |      |           |         | -    |
| ZMO1372 | 1385464 | 1384625 | -2 | 840  | NP_250021  | probable short-chain dehydroger     | 255  | 7.00E-67  | COG1028 | IQR  |
| ZMO1373 | 1385910 | 1386422 | 3  | 513  |            | hypothetical protein                |      |           |         | -    |
| ZMO1374 | 1387535 | 1386588 | -3 | 948  | NP_107357  | conserved hypothetical protein      | 374  | 1.00E-102 | COG0451 | MG   |
| ZMO1375 | 1388338 | 1387673 | -2 | 666  | Q9Z5U2 RNC | ribonuclease III (RNase III)        | 430  | 1.00E-119 | COG0571 | K    |
| ZMO1376 | 1388469 | 1388585 | 3  | 117  |            | hypothetical protein                |      |           |         | -    |
| ZMO1377 | 1389883 | 1388711 | -2 | 1173 |            | hypothetical protein                |      |           |         | -    |
| ZMO1378 | 1391592 | 1390189 | -1 | 1404 | AAK51697   | permease (ethanolamin), amino       | 574  | 1.00E-162 | COG0531 | E    |
| ZMO1379 | 1391782 | 1391561 | -2 | 222  |            | hypothetical protein                |      |           |         | -    |
| ZMO1380 | 1392982 | 1391918 | -2 | 1065 | ZP_0001439 | transcriptional regulatory protein, | 256  | 5.00E-67  | COG2207 | K    |
| ZMO1381 | 1394370 | 1393192 | -1 | 1179 | NP_535625  | conserved hypothetical protein, t   | 249  | 9.00E-65  | COG2334 | R    |
| ZMO1382 | 1394440 | 1395759 | 1  | 1320 | NP_436219  | putative aminotransferase           | 458  | 1.00E-127 | COG0160 | E    |
| ZMO1383 | 1395857 | 1395958 | 2  | 102  |            | hypothetical protein                |      |           |         | -    |
| ZMO1384 | 1395955 | 1396875 | 1  | 921  | ZP_0009416 | GTPase                              | 370  | 1.00E-101 | COG1159 | R    |

|         |         |         |    |      |             |                                     |      |           |         |      |
|---------|---------|---------|----|------|-------------|-------------------------------------|------|-----------|---------|------|
| ZMO1385 | 1396959 | 1398233 | 3  | 1275 | ZP_0009421: | conserved hypothetical protein      | 496  | 1.00E-139 | COG3853 | P    |
| ZMO1386 | 1398243 | 1398938 | 3  | 696  | ZP_0009421: | conserved hypothetical protein      | 93.2 | 4.00E-18  | -       | -    |
| ZMO1387 | 1399125 | 1399829 | 3  | 705  | ZP_0009683: | two-component response regulat      | 376  | 1.00E-103 | COG0745 | TK   |
| ZMO1388 | 1401727 | 1399967 | -2 | 1761 | NP_419350   | gamma-glutamyltransferase           | 625  | 1.00E-177 | COG0405 | E    |
| ZMO1389 | 1401890 | 1404070 | 2  | 2181 | ZP_0009385: | thiol:disulfide interchange protein | 512  | 1.00E-143 | COG4232 | OC   |
| ZMO1390 | 1405027 | 1404128 | -2 | 900  | NP_840879   | conserved hypothetical protein      | 171  | 2.00E-41  | -       | -    |
| ZMO1391 | 1406078 | 1405107 | -3 | 972  | ZP_0009043: | sphingosine kinase                  | 94.7 | 2.00E-18  | -       | -    |
| ZMO1392 | 1406578 | 1406081 | -2 | 498  | ZP_0009603: | conserved hypothetical protein      | 52   | 4.00E-06  | -       | -    |
| ZMO1393 | 1407222 | 1407956 | 3  | 735  | ZP_0009365: | permeases, predicted                | 213  | 6.00E-54  | COG0795 | R    |
| ZMO1394 | 1407953 | 1409047 | 2  | 1095 | ZP_0009364: | permeases, predicted                | 335  | 7.00E-91  | COG0795 | R    |
| ZMO1395 | 1409909 | 1409052 | -3 | 858  | ZP_0009362: | N-formylglutamate amidohydrola      | 171  | 1.00E-41  | COG3741 | E    |
| ZMO1396 | 1410568 | 1409900 | -2 | 669  |             | hypothetical protein                |      |           | -       | -    |
| ZMO1397 | 1410688 | 1410795 | 1  | 108  |             | hypothetical protein                |      |           | -       | -    |
| ZMO1398 | 1411145 | 1410903 | -3 | 243  |             | hypothetical protein                |      |           | -       | -    |
| ZMO1399 | 1411450 | 1412124 | 1  | 675  | NP_655509   | conserved hypothetical protein      | 78.2 | 2.00E-13  | COG3000 | I    |
| ZMO1400 | 1412260 | 1413417 | 1  | 1158 | ZP_0009556: | conserved hypothetical protein      | 457  | 1.00E-127 | -       | -    |
| ZMO1401 | 1414278 | 1413499 | -1 | 780  | NP_252861   | nuclease, probable                  | 288  | 6.00E-77  | COG0708 | L    |
| ZMO1402 | 1414625 | 1414284 | -3 | 342  | ZP_0009645: | conserved hypothetical protein      | 123  | 8.00E-28  | COG0316 | S    |
| ZMO1403 | 1415730 | 1414723 | -1 | 1008 | ZP_0009468: | membrane proteins related to me     | 164  | 2.00E-39  | COG0739 | M    |
| ZMO1404 | 1416642 | 1415950 | -1 | 693  | ZP_0009555: | RNA polymerase sigma-24 facto       | 202  | 6.00E-51  | COG1595 | K    |
| ZMO1405 | 1417504 | 1416716 | -2 | 789  | NP_422271   | two component response regulat      | 283  | 2.00E-75  | COG0784 | T    |
| ZMO1406 | 1418486 | 1417740 | -3 | 747  | ZP_0009508: | hydrolases or acyltransferases      | 166  | 4.00E-40  | COG0596 | R    |
| ZMO1407 | 1419729 | 1418710 | -1 | 1020 | ZP_0009508: | aspartate-semialdehyde dehydr       | 574  | 1.00E-163 | COG0136 | E    |
| ZMO1408 | 1421998 | 1419842 | -2 | 2157 | ZP_0009508: | dipeptidyl aminopeptidases/acyl     | 791  | 0         | COG1506 | E    |
| ZMO1409 | 1423039 | 1422227 | -2 | 813  | ZP_0009361: | archaeal fructose-1,6-bisphosph     | 233  | 4.00E-60  | COG0483 | G    |
| ZMO1410 | 1423567 | 1424058 | 1  | 492  | NP_903069   | bacterioferritin                    | 178  | 3.00E-44  | COG2193 | P    |
| ZMO1411 | 1424606 | 1424181 | -3 | 426  | ZP_0009591: | Fe2+/Zn2+ uptake regulation prc     | 216  | 5.00E-56  | COG0735 | P    |
| ZMO1412 | 1425267 | 1424860 | -1 | 408  | ZP_0009591: | transcriptional regulator, predicte | 188  | 1.00E-47  | COG4957 | K    |
| ZMO1413 | 1425919 | 1425449 | -2 | 471  | ZP_0001316: | acetyltransferases                  | 75.5 | 3.00E-13  | COG0456 | R    |
| ZMO1414 | 1426542 | 1425922 | -1 | 621  | ZP_0009591: | metal-dependent proteases, put      | 154  | 1.00E-36  | COG1214 | O    |
| ZMO1415 | 1427045 | 1426548 | -3 | 498  | ZP_0009591: | thioredoxin-like proteins and don   | 171  | 7.00E-42  | COG0694 | O    |
| ZMO1416 | 1427040 | 1427168 | 3  | 129  |             | hypothetical protein                |      |           | -       | -    |
| ZMO1417 | 1427547 | 1428923 | 3  | 1377 | ZP_0009677: | DNA and RNA helicases superfa       | 538  | 1.00E-152 | COG0513 | LKJ  |
| ZMO1418 | 1429396 | 1429262 | -2 | 135  |             | hypothetical protein                |      |           | -       | -    |
| ZMO1419 | 1430435 | 1429485 | -3 | 951  | NP_422215   | 4-hydroxybenzoate octaprenyltra     | 257  | 2.00E-67  | COG0382 | H    |
| ZMO1420 | 1430675 | 1431214 | 2  | 540  | NP_534248   | phosphoribosylaminoimidazole c      | 228  | 5.00E-59  | COG0041 | F    |
| ZMO1421 | 1431211 | 1432299 | 1  | 1089 | NP_773755   | phosphoribosylaminoimidazole c      | 307  | 3.00E-82  | COG0026 | F    |
| ZMO1422 | 1435280 | 1432380 | -3 | 2901 | ZP_0009449: | predicted Zn-dependent peptida      | 904  | 0         | COG0612 | R    |
| ZMO1423 | 1438188 | 1435417 | -1 | 2772 | ZP_0009449: | predicted Zn-dependent peptida      | 780  | 0         | COG0612 | R    |
| ZMO1424 | 1438454 | 1441048 | 2  | 2595 | NP_698844   | heat shock protein, ATP-depend      | 1177 | 0         | COG0542 | O    |
| ZMO1425 | 1441742 | 1441158 | -3 | 585  | ZP_0005578: | thiamine monophosphate syntha       | 76.6 | 3.00E-13  | COG0352 | H    |
| ZMO1426 | 1441905 | 1442330 | 3  | 426  | NP_622549   | DNA repair proteins                 | 79.3 | 1.00E-14  | COG2003 | L    |
| ZMO1427 | 1442584 | 1442444 | -2 | 141  |             | hypothetical protein                |      |           | -       | -    |
| ZMO1428 | 1442587 | 1442441 | 1  | 147  | ZP_0001626: | sphingosine kinase                  | 159  | 6.00E-38  | COG1597 | IR   |
| ZMO1429 | 1445306 | 1443609 | -3 | 1698 | NP_902518   | outer membrane component of n       | 360  | 5.00E-98  | COG1538 | MU   |
| ZMO1430 | 1446400 | 1445309 | -2 | 1092 | NP_883923   | secretion protein, multidrug resis  | 277  | 3.00E-73  | COG1566 | V    |
| ZMO1431 | 1446642 | 1446415 | -1 | 228  | NP_541510   | conserved hypothetical membrar      | 53.9 | 7.00E-07  | -       | -    |
| ZMO1432 | 1448669 | 1446645 | -3 | 2025 | NP_889617   | conserved hypothetical membrar      | 368  | 1.00E-100 | COG1289 | S    |
| ZMO1433 | 1450131 | 1449124 | -1 | 1008 | ZP_0009579: | DNA polymerase III, delta subun     | 124  | 3.00E-27  | COG1466 | L    |
| ZMO1434 | 1450692 | 1450147 | -1 | 546  | ZP_0009579: | conserved hypothetical protein      | 152  | 3.00E-36  | COG5468 | S    |
| ZMO1435 | 1453292 | 1450758 | -3 | 2535 | ZP_0009580: | leucyl-tRNA synthetase              | 1145 | 0         | COG0495 | J    |
| ZMO1436 | 1453750 | 1453316 | -2 | 435  | ZP_0009580: | conserved hypothetical protein      | 172  | 8.00E-43  | -       | -    |
| ZMO1437 | 1454782 | 1454156 | -2 | 627  | NP_931341   | conserved hypothetical protein      | 197  | 1.00E-49  | COG1280 | E    |
| ZMO1438 | 1454986 | 1455447 | 1  | 462  | AAL18479    | transcriptional regulator, putative | 187  | 7.00E-47  | COG1522 | K    |
| ZMO1439 | 1456331 | 1455453 | -3 | 879  | NP_459623   | hydrolase, putative                 | 277  | 2.00E-73  | COG0388 | R    |
| ZMO1440 | 1457121 | 1456297 | -1 | 825  | ZP_0009580: | conserved hypothetical protein      | 71.2 | 2.00E-11  | -       | -    |
| ZMO1441 | 1457593 | 1458711 | 1  | 1119 | ZP_0009410: | glycine/D-amino acid oxidases (c    | 348  | 1.00E-94  | COG0665 | E    |
| ZMO1442 | 1459655 | 1458762 | -3 | 894  | NP_103522   | conserved hypothetical protein      | 124  | 2.00E-27  | -       | -    |
| ZMO1443 | 1459840 | 1461168 | 1  | 1329 | NP_419982   | conserved hypothetical protein      | 216  | 9.00E-55  | COG2244 | R    |
| ZMO1444 | 1463589 | 1461547 | -1 | 2043 | ZP_0009393: | glycyl-tRNA synthetase, beta sut    | 622  | 1.00E-176 | COG0751 | J    |
| ZMO1445 | 1464445 | 1464555 | 1  | 111  |             | hypothetical protein                |      |           | -       | -    |
| ZMO1446 | 1464465 | 1463599 | -1 | 867  | ZP_0001398: | glycyl-tRNA synthetase, alpha su    | 452  | 1.00E-126 | COG0752 | J    |
| ZMO1447 | 1464799 | 1465860 | 1  | 1062 | ZP_0009331: | conserved hypothetical protein      | 167  | 3.00E-40  | COG3735 | S    |
| ZMO1448 | 1466454 | 1466068 | -1 | 387  |             | hypothetical protein                |      |           | -       | -    |
| ZMO1449 | 1468200 | 1466695 | -1 | 1506 | BAB83933    | L-sorbose reductase                 | 420  | 1.00E-116 | COG0246 | G    |
| ZMO1450 | 1468622 | 1470031 | 2  | 1410 | NP_531913   | DNA photolyase, blue-light phot     | 390  | 1.00E-107 | COG0415 | L    |
| ZMO1451 | 1471223 | 1470132 | -3 | 1092 | NP_419006   | purine nucleoside permease, put     | 267  | 2.00E-70  | COG5042 | F    |
| ZMO1452 | 1472607 | 1471384 | -1 | 1224 | ZP_0003130: | arabinose efflux permease           | 315  | 1.00E-84  | COG2814 | G    |
| ZMO1453 | 1472592 | 1472699 | 3  | 108  |             | hypothetical protein                |      |           | -       | -    |
| ZMO1454 | 1472763 | 1472614 | -1 | 150  |             | hypothetical protein                |      |           | -       | -    |
| ZMO1455 | 1472781 | 1473377 | 3  | 597  | NP_943127   | Tn5501 resolvase, transposase       | 254  | 5.00E-67  | COG1961 | L    |
| ZMO1456 | 1473684 | 1474340 | 3  | 657  | NP_419275   | efflux protein, LysE family         | 144  | 1.00E-33  | COG1280 | E    |
| ZMO1457 | 1474414 | 1475832 | 1  | 1419 | NP_819596   | major facilitator family transport  | 173  | 8.00E-42  | COG0477 | GEPR |
| ZMO1458 | 1475864 | 1477645 | 2  | 1782 |             | hypothetical protein                |      |           | -       | -    |
| ZMO1459 | 1478281 | 1477664 | -2 | 618  | AAL07520    | transporter, putative               | 143  | 2.00E-33  | COG3201 | H    |
| ZMO1460 | 1479114 | 1478242 | -1 | 873  | NP_822511   | thiosulfate sulfurtransferase (rho  | 222  | 8.00E-57  | COG2897 | P    |
| ZMO1461 | 1480270 | 1479122 | -2 | 1149 | NP_636067   | conserved hypothetical protein      | 301  | 2.00E-80  | -       | -    |

|         |         |         |    |      |            |                                     |      |           |         |     |
|---------|---------|---------|----|------|------------|-------------------------------------|------|-----------|---------|-----|
| ZMO1462 | 1481195 | 1480269 | -3 | 927  | NP_822512  | conserved hypothetical protein      | 287  | 2.00E-76  | COG0715 | P   |
| ZMO1463 | 1483018 | 1481216 | -2 | 1803 | NP_902858  | TonB-dependent receptor, probab     | 282  | 2.00E-74  | COG1629 | P   |
| ZMO1464 | 1483981 | 1483760 | -2 | 222  |            | hypothetical protein                |      |           |         | -   |
| ZMO1465 | 1485542 | 1484220 | -3 | 1323 | NP_462153  | transport protein, putative         | 584  | 1.00E-165 | COG0814 | E   |
| ZMO1466 | 1486537 | 1485752 | -2 | 786  | NP_773784  | oxidoreductase                      | 214  | 2.00E-54  | COG0596 | R   |
| ZMO1467 | 1486762 | 1487586 | 1  | 825  | AAK26458   | ABC-2 transporter, putative, poly   | 181  | 1.00E-44  | COG1682 | GM  |
| ZMO1468 | 1490048 | 1487631 | -3 | 2418 |            | hypothetical protein                |      |           |         | -   |
| ZMO1469 | 1490405 | 1490518 | 2  | 114  |            | hypothetical protein                |      |           |         | -   |
| ZMO1470 | 1491334 | 1490504 | -2 | 831  | NP_948727  | conserved hypothetical protein      | 155  | 9.00E-37  |         | -   |
| ZMO1471 | 1493438 | 1491627 | -3 | 1812 | ZP_0009597 | membrane GTPase involved in s       | 959  | 0         | COG1217 | T   |
| ZMO1472 | 1493400 | 1493519 | 3  | 120  |            | hypothetical protein                |      |           |         | -   |
| ZMO1473 | 1493885 | 1494622 | 2  | 738  | NP_298118  | conserved hypothetical protein      | 94.7 | 1.00E-18  |         | -   |
| ZMO1474 | 1494640 | 1494777 | 1  | 138  |            | hypothetical protein                |      |           |         | -   |
| ZMO1475 | 1495116 | 1497578 | 3  | 2463 | ZP_0002744 | outer membrane receptor protei      | 683  | 0         | COG1629 | P   |
| ZMO1476 | 1497814 | 1498137 | 1  | 324  |            | hypothetical protein                |      |           |         | -   |
| ZMO1477 | 1499049 | 1498162 | -1 | 888  |            | hypothetical protein                |      |           |         | -   |
| ZMO1478 | 1499859 | 1499113 | -1 | 747  | ZP_0008984 | 6-phosphogluconolactonase/gluc      | 131  | 1.00E-29  | COG0363 | G   |
| ZMO1479 | 1501079 | 1500153 | -3 | 927  | NP_104580  | electron transfer flavoprotein alpl | 347  | 2.00E-94  | COG2025 | C   |
| ZMO1480 | 1501825 | 1501082 | -2 | 744  | NP_534091  | electron transfer flavoprotein bet  | 343  | 2.00E-93  | COG2086 | C   |
| ZMO1481 | 1503084 | 1501894 | -1 | 1191 | ZP_0009552 | succinyl-CoA synthetase, beta su    | 487  | 1.00E-136 | COG0045 | C   |
| ZMO1482 | 1506816 | 1503622 | -1 | 3195 | NP_947281  | serine protease/outer membrane      | 73.2 | 3.00E-11  | COG4625 | S   |
| ZMO1483 | 1507091 | 1506918 | -3 | 174  |            | hypothetical protein                |      |           |         | -   |
| ZMO1484 | 1510265 | 1507128 | -3 | 3138 | ZP_0005878 | DNA and RNA helicases superfa       | 804  | 0         | COG0210 | L   |
| ZMO1485 | 1510373 | 1511713 | 2  | 1341 | ZP_0004495 | dGTP triphosphohydrolase            | 297  | 4.00E-79  | COG0232 | F   |
| ZMO1486 | 1511889 | 1512017 | 3  | 129  |            | hypothetical protein                |      |           |         | -   |
| ZMO1487 | 1512806 | 1512036 | -3 | 771  | ZP_0008645 | FOG: EAL domain                     | 219  | 6.00E-56  | COG2200 | T   |
| ZMO1488 | 1513817 | 1512945 | -3 | 873  | NP_890240  | 2-dehydro-3-deoxyphosphoctor        | 357  | 2.00E-97  | COG2877 | M   |
| ZMO1489 | 1514634 | 1513840 | -1 | 795  | ZP_0000805 | CMP-2-keto-3-deoxyoctulosonic       | 238  | 7.00E-62  | COG1212 | M   |
| ZMO1490 | 1515030 | 1515644 | 3  | 615  | NP_948710  | outer membrane protein, putative    | 64.7 | 1.00E-09  | COG3637 | M   |
| ZMO1491 | 1515939 | 1516742 | 3  | 804  | NP_948710  | outer membrane protein, putative    | 59.3 | 8.00E-08  | COG3637 | M   |
| ZMO1492 | 1517206 | 1517030 | -2 | 177  |            | hypothetical protein                |      |           |         | -   |
| ZMO1493 | 1518121 | 1517549 | -2 | 573  | ZP_0004841 | predicted membrane protein          | 194  | 1.00E-48  | COG1238 | S   |
| ZMO1494 | 1519047 | 1518148 | -1 | 900  | ZP_0009672 | acetylglutamate kinase              | 404  | 1.00E-111 | COG0548 | E   |
| ZMO1495 | 1519762 | 1519199 | -2 | 564  | NP_386747  | conserved hypothetical protein      | 162  | 2.00E-39  | COG2096 | S   |
| ZMO1496 | 1520273 | 1522930 | 2  | 2658 | NP_520479  | phosphoenolpyruvate carboxylas      | 699  | 0         | COG2352 | E   |
| ZMO1497 | 1524567 | 1523077 | -1 | 1491 | NP_840598  | amino acid transporter              | 640  | 0         | COG0531 | C   |
| ZMO1498 | 1525276 | 1524905 | -2 | 372  | ZP_0009594 | diadenosine tetraphosphate (Ap      | 163  | 7.00E-40  | COG0537 | FGR |
| ZMO1499 | 1525745 | 1525428 | -3 | 318  | ZP_0009594 | phosphoribosyl-ATP pyrophosph       | 111  | 3.00E-24  | COG0140 | E   |
| ZMO1500 | 1526617 | 1525856 | -2 | 762  | ZP_0009594 | imidazoleglycerol phosphate syn     | 401  | 1.00E-111 | COG0107 | E   |
| ZMO1501 | 1527414 | 1526620 | -1 | 795  | ZP_0009593 | phosphoribosylformimino-5-amin      | 315  | 8.00E-85  | COG0106 | E   |
| ZMO1502 | 1528160 | 1527477 | -3 | 684  | ZP_0009593 | glutamine amidotransferase          | 253  | 2.00E-66  | COG0118 | E   |
| ZMO1503 | 1528734 | 1528120 | -1 | 615  | ZP_0009593 | imidazoleglycerol-phosphate del     | 271  | 6.00E-72  | COG0131 | E   |
| ZMO1504 | 1528795 | 1529286 | 1  | 492  | ZP_0009593 | conserved hypothetical protein      | 197  | 5.00E-50  | COG3814 | S   |
| ZMO1505 | 1529317 | 1529502 | 1  | 186  |            | hypothetical protein                |      |           |         | -   |
| ZMO1506 | 1529509 | 1529847 | 1  | 339  |            | hypothetical protein                |      |           |         | -   |
| ZMO1507 | 1530448 | 1529921 | -2 | 528  | ZP_0009681 | inorganic pyrophosphatase           | 262  | 3.00E-69  | COG0221 | C   |
| ZMO1508 | 1530657 | 1530803 | 2  | 147  | ZP_0009681 | histidyl-tRNA synthetase            | 436  | 1.00E-121 | COG0124 | J   |
| ZMO1509 | 1531912 | 1532988 | 1  | 1077 | ZP_0009681 | protein chain release factor A      | 424  | 1.00E-117 | COG0216 | J   |
| ZMO1510 | 1532945 | 1533841 | 2  | 897  | ZP_0009681 | methylase of polypeptide chain r    | 228  | 9.00E-59  | COG2890 | J   |
| ZMO1511 | 1534152 | 1535225 | 3  | 1074 | NP_419693  | conserved hypothetical protein      | 80.9 | 4.00E-14  |         | -   |
| ZMO1512 | 1537071 | 1535290 | -1 | 1782 | ZP_0009416 | ABC-type transport system invol     | 644  | 0         | COG5265 | O   |
| ZMO1513 | 1539517 | 1537154 | -2 | 2364 | NP_767345  | phenylalanyl-tRNA synthetase be     | 717  | 0         | COG0072 | J   |
| ZMO1514 | 1540614 | 1539520 | -1 | 1095 | ZP_0009475 | phenylalanyl-tRNA synthetase al     | 534  | 1.00E-150 | COG0016 | J   |
| ZMO1515 | 1541280 | 1540909 | -1 | 372  | ZP_0009475 | ribosomal protein L20               | 197  | 3.00E-50  | COG0292 | J   |
| ZMO1516 | 1541497 | 1541300 | -2 | 198  | ZP_0009475 | ribosomal protein L35               | 116  | 1.00E-25  | COG0291 | J   |
| ZMO1517 | 1541615 | 1541460 | -3 | 156  |            | hypothetical protein                |      |           |         | -   |
| ZMO1518 | 1542422 | 1541649 | -3 | 774  | ZP_0001482 | archaeal fructose-1,6-bisphosph     | 260  | 2.00E-68  | COG0483 | G   |
| ZMO1519 | 1543403 | 1542474 | -3 | 930  | ZP_0009590 | phosphoribosylpyrophosphate sy      | 479  | 1.00E-134 | COG0462 | FE  |
| ZMO1520 | 1543838 | 1543614 | -3 | 225  | NP_531398  | conserved hypothetical protein      | 66   | 2.00E-10  | COG3908 | S   |
| ZMO1521 | 1544565 | 1543993 | -1 | 573  | NP_421618  | conserved hypothetical protein      | 91.3 | 9.00E-18  |         | -   |
| ZMO1522 | 1544960 | 1548106 | 2  | 3147 | NP_299516  | conserved hypothetical protein (r   | 530  | 1.00E-149 | COG1629 | P   |
| ZMO1523 | 1548482 | 1548381 | -3 | 102  |            | hypothetical protein                |      |           |         | -   |
| ZMO1524 | 1548492 | 1549421 | 3  | 930  | NP_699849  | membrane protein, putative          | 246  | 4.00E-64  | COG0697 | GER |
| ZMO1525 | 1552581 | 1549492 | -1 | 3090 | ZP_0008826 | outer membrane protein              | 322  | 2.00E-86  | COG1538 | MU  |
| ZMO1526 | 1552794 | 1552678 | -1 | 117  |            | hypothetical protein                |      |           |         | -   |
| ZMO1527 | 1556023 | 1552730 | -2 | 3294 | ZP_0002819 | cation/multidrug efflux pump        | 1122 | 0         | COG0841 | V   |
| ZMO1528 | 1559118 | 1556026 | -1 | 3093 | ZP_0002815 | cation/multidrug efflux pump        | 1113 | 0         | COG0841 | V   |
| ZMO1529 | 1560453 | 1559164 | -1 | 1290 | NP_251218  | probable RND efflux membrane t      | 305  | 1.00E-81  | COG0845 | M   |
| ZMO1530 | 1560938 | 1561948 | 2  | 1011 | ZP_0005496 | FOG: CBS domain                     | 303  | 4.00E-81  | COG0794 | M   |
| ZMO1531 | 1562121 | 1562354 | 3  | 234  | ZP_0009383 | phosphoribosylformylglycinamidi     | 117  | 7.00E-26  | COG1828 | F   |
| ZMO1532 | 1562354 | 1563019 | 2  | 666  | ZP_0009383 | phosphoribosylformylglycinamidi     | 311  | 5.00E-84  | COG0047 | F   |
| ZMO1533 | 1563462 | 1564046 | 3  | 585  | ZP_0011030 | conserved hypothetical protein      | 100  | 2.00E-20  | COG3247 | S   |
| ZMO1534 | 1564282 | 1564169 | -2 | 114  |            | hypothetical protein                |      |           |         | -   |
| ZMO1535 | 1564380 | 1564682 | 3  | 303  | NP_109452  | conserved hypothetical protein      | 61.2 | 4.00E-09  | COG3293 | L   |
| ZMO1536 | 1566836 | 1565175 | -3 | 1662 | NP_763374  | ATPase involved in DNA repair       | 343  | 4.00E-93  |         | -   |
| ZMO1537 | 1567694 | 1567593 | -3 | 102  |            | hypothetical protein                |      |           |         | -   |
| ZMO1538 | 1571143 | 1567775 | -2 | 3369 | ZP_0009486 | DNA polymerase III, alpha subur     | 1190 | 0         | COG0587 | L   |

|         |         |         |    |      |                                                |      |           |         |   |     |
|---------|---------|---------|----|------|------------------------------------------------|------|-----------|---------|---|-----|
| ZMO1539 | 1571503 | 1571634 | 1  | 132  | hypothetical protein                           |      |           |         | - | P   |
| ZMO1540 | 1571649 | 1571951 | 3  | 303  | ZP_0002590; Fe2+ transport system protein A    | 58.9 | 2.00E-08  | COG1918 |   | P   |
| ZMO1541 | 1571957 | 1573882 | 2  | 1926 | ZP_0009641; Fe2+ transport system protein B    | 670  | 0         | COG0370 |   | P   |
| ZMO1542 | 1573978 | 1574559 | 1  | 582  | NP_532201 single-strand DNA binding protei     | 237  | 1.00E-61  | COG0629 |   | L   |
| ZMO1543 | 1576492 | 1574636 | -2 | 1857 | ZP_0009525; cobalamin biosynthesis protein C   | 651  | 0         | COG4547 |   | H   |
| ZMO1544 | 1577482 | 1576505 | -2 | 978  | ZP_0009637; MoxR-like ATPases                  | 504  | 1.00E-141 | COG0714 |   | R   |
| ZMO1545 | 1578134 | 1577517 | -3 | 618  | ZP_0009635; heat shock protein, DnaJ-class n   | 192  | 5.00E-48  | COG2214 |   | O   |
| ZMO1546 | 1578331 | 1577690 | -2 | 642  | ZP_0009635; heat shock protein, DnaJ-class n   | 126  | 3.00E-28  | COG2214 |   | O   |
| ZMO1547 | 1578272 | 1578838 | 2  | 567  | ZP_0005126; transcriptional regulator          | 201  | 8.00E-51  | COG1309 |   | K   |
| ZMO1548 | 1578854 | 1581031 | 2  | 2178 | NP_951745 squalene-hopene cyclase              | 561  | 1.00E-158 | COG1657 |   | I   |
| ZMO1549 | 1581396 | 1581701 | 3  | 306  | NP_421805 BolA protein                         | 84   | 6.00E-16  | COG0271 |   | T   |
| ZMO1550 | 1581790 | 1582458 | 1  | 669  | Q9RH04 HIS ATP phosphoribosyltransferase       | 431  | 1.00E-120 | COG0040 |   | E   |
| ZMO1551 | 1582700 | 1583740 | 2  | 1041 | Q9RH05 HIS; histidinol dehydrogenase (HDH)     | 633  | 1.00E-180 | COG0141 |   | E   |
| ZMO1552 | 1583824 | 1584213 | 1  | 390  | ZP_0009634; transcription termination factor   | 185  | 3.00E-46  | COG0781 |   | K   |
| ZMO1553 | 1584226 | 1585197 | 1  | 972  | NP_420174 thiamine-monophosphate kinase        | 177  | 3.00E-43  | COG0611 |   | H   |
| ZMO1554 | 1585506 | 1586276 | 3  | 771  | NP_422209 conserved hypothetical protein       | 204  | 1.00E-51  | COG1385 |   | S   |
| ZMO1555 | 1586439 | 1586329 | -1 | 111  | hypothetical protein                           |      |           |         |   | -   |
| ZMO1556 | 1586582 | 1587970 | 2  | 1389 | AAF18278 gamma-glutamylcysteine synthel        | 948  | 0         | COG3572 |   | H   |
| ZMO1557 | 1588393 | 1589919 | 1  | 1527 | NP_108068 amidophosphoribosyltransferase       | 637  | 0         | COG0034 |   | F   |
| ZMO1558 | 1590247 | 1590369 | 1  | 123  | hypothetical protein                           |      |           |         |   | -   |
| ZMO1559 | 1591018 | 1590911 | -2 | 108  | hypothetical protein                           |      |           |         |   | -   |
| ZMO1560 | 1591219 | 1591106 | -2 | 114  | hypothetical protein                           |      |           |         |   | -   |
| ZMO1561 | 1591364 | 1592068 | 2  | 705  | ZP_0009344; dehydrogenases with different s;e  | 185  | 7.00E-46  | COG1028 |   | IQR |
| ZMO1562 | 1592135 | 1592602 | 2  | 468  | ZP_0000760; NTP pyrophosphohydrolases inc      | 154  | 4.00E-37  | COG0494 |   | LR  |
| ZMO1563 | 1592747 | 1593610 | 2  | 864  | ZP_0009622; putative salt-induced outer mem    | 137  | 2.00E-31  | COG3137 |   | M   |
| ZMO1564 | 1594398 | 1593838 | -1 | 561  | gb AAL07520; transporter, putative nicotinamid | 142  | 3.00E-33  | COG3201 |   | H   |
| ZMO1565 | 1594481 | 1594582 | 2  | 102  | hypothetical protein                           |      |           |         |   | -   |
| ZMO1566 | 1594871 | 1595194 | 2  | 324  | NP_949175 conserved hypothetical protein       | 143  | 5.00E-34  | COG1742 |   | S   |
| ZMO1567 | 1596374 | 1596024 | -2 | 351  | NP_636067 conserved hypothetical protein       | 230  | 2.00E-59  |         |   | -   |
| ZMO1568 | 1598123 | 1596390 | -3 | 1734 | NP_790852 TonB-dependent receptor, putati      | 288  | 3.00E-76  | COG1629 |   | P   |
| ZMO1569 | 1599778 | 1598972 | -2 | 807  | NP_901083 pyruvate formate lyase activatin     | 261  | 1.00E-68  | COG1180 |   | O   |
| ZMO1570 | 1602056 | 1599747 | -3 | 2310 | NP_681780 formate acetyltransferase, pfl       | 1077 | 0         | COG1882 |   | C   |
| ZMO1571 | 1602823 | 1604253 | 1  | 1431 | ZP_0009595; cytochrome bd-type quinol oxida    | 557  | 1.00E-157 | COG1271 |   | C   |
| ZMO1572 | 1604260 | 1605282 | 1  | 1023 | ZP_0008765; cytochrome bd-type quinol oxida    | 345  | 6.00E-94  | COG1294 |   | C   |
| ZMO1573 | 1605592 | 1606521 | 1  | 930  | ZP_0002448; predicted iron-dependent peroxic   | 359  | 4.00E-98  | COG2837 |   | P   |
| ZMO1574 | 1606647 | 1607555 | 3  | 909  | NP_771239 transcriptional regulatory protein   | 328  | 1.00E-88  | COG0583 |   | K   |
| ZMO1575 | 1607654 | 1607770 | 2  | 117  | hypothetical protein                           |      |           |         |   | -   |
| ZMO1576 | 1607748 | 1608494 | 3  | 747  | ZP_0008695; short-chain alcohol dehydrogena    | 244  | 1.00E-63  | COG4221 |   | R   |
| ZMO1577 | 1608752 | 1609972 | 2  | 1221 | ZP_000869; arabinose efflux permease           | 463  | 1.00E-129 | COG2814 |   | G   |
| ZMO1578 | 1610019 | 1610783 | 3  | 765  | ZP_000791; dehydrogenases with different s;e   | 293  | 2.00E-78  | COG1028 |   | IQR |
| ZMO1579 | 1610847 | 1611968 | 3  | 1122 | CAE81060 alpha/beta hydrolase superfamily      | 456  | 1.00E-127 | COG1073 |   | R   |
| ZMO1580 | 1616983 | 1617117 | 1  | 135  | hypothetical protein                           |      |           |         |   | -   |
| ZMO1581 | 1618669 | 1618965 | 1  | 297  | ZP_0009031; conserved hypothetical protein     | 86.7 | 9.00E-17  | COG1359 |   | S   |
| ZMO1582 | 1619501 | 1619016 | -3 | 486  | ZP_000948; G:T/U mismatch-specific DNA gl      | 161  | 4.00E-39  | COG3663 |   | L   |
| ZMO1583 | 1622323 | 1619891 | -2 | 2433 | ZP_000967; Type IIA topoisomerase (DNA gy      | 1144 | 0         | COG0187 |   | L   |
| ZMO1584 | 1623596 | 1622472 | -3 | 1125 | ZP_000948; Recombinational DNA repair ATF      | 290  | 3.00E-77  | COG1195 |   | L   |
| ZMO1585 | 1623711 | 1623574 | -1 | 138  | hypothetical protein                           |      |           |         |   | -   |
| ZMO1586 | 1623714 | 1623571 | 3  | 144  | NP_935820 bacterioferritin (cytochrome b1)     | 169  | 2.00E-41  | COG2193 |   | P   |
| ZMO1587 | 1624274 | 1624627 | 2  | 354  | CAE69762 conserved hypothetical protein        | 50.4 | 7.00E-06  |         |   | -   |
| ZMO1588 | 1624785 | 1627625 | 3  | 2841 | AAM12400 excinuclease ABC subunit A            | 1843 | 0         | COG0178 |   | L   |
| ZMO1589 | 1627796 | 1628725 | 2  | 930  | NP_798191 conserved hypothetical protein       | 168  | 1.00E-40  |         |   | -   |
| ZMO1590 | 1629594 | 1628839 | -1 | 756  | ZP_0001428; ABC-type transport system invol    | 259  | 3.00E-68  | COG1127 |   | Q   |
| ZMO1591 | 1630364 | 1629609 | -3 | 756  | ZP_0005398; ABC-type transport system invol    | 288  | 9.00E-77  | COG0767 |   | Q   |
| ZMO1592 | 1631474 | 1630431 | -3 | 1044 | NP_770710 alanine racemase                     | 216  | 4.00E-55  | COG0787 |   | M   |
| ZMO1593 | 1633492 | 1631564 | -2 | 1929 | ZP_000968; protease with the C-terminal PD;    | 619  | 1.00E-176 | COG3975 |   | R   |
| ZMO1594 | 1633761 | 1633546 | -1 | 216  | hypothetical protein                           |      |           |         |   | -   |
| ZMO1595 | 1633821 | 1633994 | 3  | 174  | hypothetical protein                           |      |           |         |   | -   |
| ZMO1596 | 1634679 | 1635830 | 3  | 1152 | P06758 ADH; alcohol dehydrogenase II (ADH I    | 752  | 0         | COG1454 |   | C   |
| ZMO1597 | 1635986 | 1636156 | 2  | 171  | hypothetical protein                           |      |           |         |   | -   |
| ZMO1598 | 1636224 | 1638206 | 3  | 1983 | ZP_0009646; deoxyxylulose-5-phosphate synt     | 892  | 0         | COG1154 |   | HI  |
| ZMO1599 | 1638299 | 1640908 | 2  | 2610 | ZP_000309; exporters of the RND superfamil     | 659  | 0         | COG2409 |   | R   |
| ZMO1600 | 1641142 | 1642104 | 1  | 963  | ZP_000147; homoserine kinase type II           | 302  | 5.00E-81  | COG2334 |   | R   |
| ZMO1601 | 1642109 | 1642579 | 2  | 471  | O69014 RNH ribonuclease H (RNase H)            | 329  | 1.00E-89  | COG0328 |   | L   |
| ZMO1602 | 1642720 | 1644177 | 1  | 1458 | NP_404603 exported protein, putative           | 107  | 4.00E-22  | COG4099 |   | R   |
| ZMO1603 | 1644461 | 1644907 | 2  | 447  | ZP_0009352; conserved hypothetical protein     | 125  | 1.00E-28  | COG3453 |   | S   |
| ZMO1604 | 1646229 | 1644946 | -1 | 1284 | NP_643133 phosphodiesterase-nucleotide py      | 338  | 1.00E-91  | COG1524 |   | R   |
| ZMO1605 | 1647732 | 1646350 | -1 | 1383 | O66113 ODP pyruvate dehydrogenase E1 cor       | 898  | 0         | COG0022 |   | C   |
| ZMO1606 | 1648798 | 1647740 | -2 | 1059 | O66112 ODP; pyruvate dehydrogenase E1 cor      | 720  | 0         | COG1071 |   | C   |
| ZMO1607 | 1649533 | 1649171 | -2 | 363  | ZP_0009510; conserved hypothetical protein     | 56.6 | 9.00E-08  | COG2919 |   | D   |
| ZMO1608 | 1650863 | 1649580 | -3 | 1284 | P33675 ENO enolase (2-phosphoglycerate del     | 823  | 0         | COG0148 |   | G   |
| ZMO1609 | 1651068 | 1651697 | 3  | 630  | ZP_0009403; conserved hypothetical protein     | 66.6 | 3.00E-10  |         |   | -   |
| ZMO1610 | 1651700 | 1652221 | 2  | 522  | T33720 conserved hypothetical protein          |      |           |         |   | -   |
| ZMO1611 | 1652276 | 1652611 | 2  | 336  | T33720 conserved hypothetical protein          |      |           |         |   | -   |
| ZMO1612 | 1652869 | 1653453 | 1  | 585  | T33719 conserved hypothetical protein          | 379  | 1.00E-104 | COG2854 |   | Q   |
| ZMO1613 | 1653595 | 1653708 | 1  | 114  | hypothetical protein                           |      |           |         |   | -   |
| ZMO1614 | 1654428 | 1653796 | -1 | 633  | ZP_0001335; conserved hypothetical transmer    | 85.5 | 6.00E-16  | COG0705 |   | R   |

|         |         |         |    |      |            |                                    |      |           |         |    |
|---------|---------|---------|----|------|------------|------------------------------------|------|-----------|---------|----|
| ZMO1615 | 1654876 | 1654451 | -2 | 426  | O50237 GRE | transcription elongation factor gr | 281  | 2.00E-75  | COG0782 | K  |
| ZMO1616 | 1654985 | 1654869 | -3 | 117  |            | hypothetical protein               |      |           | -       | -  |
| ZMO1617 | 1658345 | 1657491 | -2 | 855  | O50236 CAR | carbamoyl-phosphate synthase I     | 1502 | 0         | COG0458 | EF |
| ZMO1618 | 1659582 | 1658416 | -1 | 1167 | O50235 CAR | carbamoyl-phosphate synthase s     | 762  | 0         | COG0505 | EF |
| ZMO1619 | 1659771 | 1660295 | 3  | 525  | ZP_000940  | conserved hypothetical protein     | 162  | 3.00E-39  | COG1610 | S  |
| ZMO1620 | 1660703 | 1660599 | -3 | 105  |            | hypothetical protein               |      |           | -       | -  |
| ZMO1621 | 1660966 | 1661223 | 1  | 258  |            | hypothetical protein               |      |           | -       | -  |
| ZMO1622 | 1661223 | 1662284 | 3  | 1062 | AAG42747   | DNA primase                        | 696  | 0         | COG0358 | L  |
| ZMO1623 | 1663111 | 1665126 | 1  | 2016 | AAG42748   | RNA polymerase sigma 70 factor     | 1046 | 0         | COG0568 | K  |
| ZMO1624 | 1666722 | 1665214 | -1 | 1509 | ZP_000968  | ATPase with chaperone activity,    | 625  | 1.00E-178 | COG0606 | O  |
| ZMO1625 | 1666996 | 1667460 | 1  | 465  | NP_774737  | ribonuclease P protein compone     | 83.6 | 1.00E-15  | COG0230 | J  |
| ZMO1626 | 1667687 | 1669426 | 2  | 1740 | ZP_000951  | preprotein translocase subunit Yi  | 528  | 1.00E-148 | COG0706 | U  |
| ZMO1627 | 1669435 | 1670073 | 1  | 639  | NP_945984  | GTPases, probable                  | 229  | 2.00E-59  | COG0218 | R  |
| ZMO1628 | 1671189 | 1670143 | -1 | 1047 | ZP_000163  | uncharacterized iron-regulated r   | 310  | 5.00E-83  | COG3182 | S  |
| ZMO1629 | 1672004 | 1671711 | -3 | 294  | ZP_000163  | conserved hypothetical protein     | 57.4 | 6.00E-08  | -       | -  |
| ZMO1630 | 1672288 | 1672007 | -2 | 282  |            | hypothetical protein               |      |           | -       | -  |
| ZMO1631 | 1674561 | 1672276 | -1 | 2286 | NP_841158  | TonB-dependent receptor proteir    | 467  | 1.00E-130 | COG1629 | P  |
| ZMO1632 | 1674853 | 1675983 | 1  | 1131 | ZP_000951  | acetylornithine deacetylase/succ   | 395  | 1.00E-108 | COG0624 | E  |
| ZMO1633 | 1676362 | 1676042 | -2 | 321  |            | hypothetical protein               |      |           | -       | -  |
| ZMO1634 | 1677113 | 1676433 | -3 | 681  | ZP_000951  | conserved hypothetical protein     | 147  | 2.00E-34  | COG2840 | S  |
| ZMO1635 | 1678698 | 1678390 | -1 | 309  | ZP_000951  | membrane-bound lytic murein tra    | 322  | 1.00E-86  | COG2821 | M  |
| ZMO1636 | 1679390 | 1678743 | -3 | 648  | NP_945656  | conserved hypothetical protein     | 106  | 3.00E-22  | COG4395 | S  |
| ZMO1637 | 1679466 | 1679597 | 3  | 132  |            | hypothetical protein               |      |           | -       | -  |
| ZMO1638 | 1679860 | 1680354 | 1  | 495  | ZP_000951  | preprotein translocase subunit S   | 173  | 2.00E-42  | COG1952 | U  |
| ZMO1639 | 1680439 | 1682052 | 1  | 1614 | ZP_000545  | uncharacterized membrane prote     | 395  | 1.00E-108 | COG0728 | R  |
| ZMO1640 | 1682076 | 1683098 | 3  | 1023 | AAG42413   | tryptophanyl-tRNA synthase         | 671  | 0         | COG0180 | J  |
| ZMO1641 | 1683217 | 1683879 | 1  | 663  | ZP_000940  | conserved hypothetical protein     | 177  | 1.00E-43  | -       | -  |
| ZMO1642 | 1685092 | 1683953 | -2 | 1140 | ZP_000519  | molecular chaperone distantly re   | 296  | 4.00E-79  | COG2377 | O  |
| ZMO1643 | 1685213 | 1686442 | 2  | 1230 | ZP_000939  | tyrosyl-tRNA synthetase            | 582  | 1.00E-165 | COG0162 | J  |
| ZMO1644 | 1688577 | 1686505 | -1 | 2073 | AAG42404   | DNA helicase RecG, ATP-depen       | 1202 | 0         | COG1200 | LK |
| ZMO1645 | 1688665 | 1688880 | 1  | 216  |            | hypothetical protein               |      |           | -       | -  |
| ZMO1646 | 1688894 | 1692292 | 2  | 3399 | NP_420651  | transcription-repair coupling fact | 1173 | 0         | COG1197 | LK |
| ZMO1647 | 1693096 | 1692551 | -2 | 546  | ZP_000945  | 7,8-dihydro-6-hydroxymethylpter    | 117  | 1.00E-25  | COG0801 | H  |
| ZMO1648 | 1693272 | 1694009 | 3  | 738  | NP_948032  | uracil-DNA glycosylase             | 236  | 4.00E-61  | COG1573 | G  |
| ZMO1649 | 1694256 | 1695326 | 3  | 1071 | NP_420038  | gluconolactonase                   | 293  | 3.00E-78  | COG3386 | L  |
| ZMO1650 | 1695701 | 1696684 | 2  | 984  | ZP_000913  | beta-lactamase class C, esterase   | 311  | 1.00E-83  | COG1680 | V  |
| ZMO1651 | 1699064 | 1696782 | -3 | 2283 | NP_766857  | phosphoenolpyruvate-protein ph     | 669  | 0         | COG3605 | R  |
| ZMO1652 | 1700070 | 1699087 | -1 | 984  | ZP_000967  | dioxygenases related to 2-nitropr  | 455  | 1.00E-127 | COG2070 | T  |
| ZMO1653 | 1701428 | 1700163 | -3 | 1266 | ZP_000967  | aspartokinases                     | 541  | 1.00E-152 | COG0527 | E  |
| ZMO1654 | 1701505 | 1702296 | 1  | 792  | ZP_000967  | 2-polyprenyl-3-methyl-5-hydroxy-   | 241  | 1.00E-62  | COG2227 | H  |
| ZMO1655 | 1702381 | 1702938 | 1  | 558  | NP_420483  | bacterioferritin comigratory prote | 85.1 | 6.00E-16  | COG1225 | O  |
| ZMO1656 | 1703125 | 1704030 | 1  | 906  | ZP_000960  | conserved hypothetical protein     | 92.8 | 8.00E-18  | COG1426 | S  |
| ZMO1657 | 1704214 | 1705284 | 1  | 1071 | ZP_000960  | conserved hypothetical protein     | 171  | 3.00E-41  | COG1729 | S  |
| ZMO1658 | 1705340 | 1706329 | 2  | 990  | ZP_000081  | ATPase implicated in cell cycle c  | 182  | 8.00E-45  | COG0037 | D  |
| ZMO1659 | 1706551 | 1708464 | 1  | 1914 | ZP_000143  | ATP-dependent Zn proteases         | 816  | 0         | COG0465 | O  |
| ZMO1660 | 1708591 | 1709004 | 1  | 414  |            | hypothetical protein               |      |           | -       | -  |
| ZMO1661 | 1709055 | 1710341 | 3  | 1287 | ZP_000960  | gamma-glutamyl phosphate redu      | 521  | 5.00E-163 | COG0014 | E  |
| ZMO1662 | 1710399 | 1711034 | 3  | 636  | ZP_000960  | nicotinic acid mononucleotide ad   | 222  | 3.00E-57  | COG1057 | H  |
| ZMO1663 | 1711043 | 1711444 | 2  | 402  | ZP_000960  | conserved hypothetical protein     | 157  | 3.00E-38  | COG0799 | S  |
| ZMO1664 | 1711516 | 1711944 | 1  | 429  | ZP_000960  | conserved hypothetical protein     | 190  | 5.00E-48  | COG1576 | S  |
| ZMO1665 | 1711944 | 1713131 | 3  | 1188 | ZP_000960  | membrane-bound metallopeptid       | 69.7 | 1.00E-10  | COG4942 | D  |
| ZMO1666 | 1713317 | 1713171 | -3 | 147  |            | hypothetical protein               |      |           | -       | -  |
| ZMO1667 | 1713304 | 1714650 | 1  | 1347 | ZP_000966  | periplasmic protease               | 479  | 1.00E-134 | COG0793 | M  |
| ZMO1668 | 1714683 | 1715288 | 3  | 606  | ZP_000966  | disulfide bond formation protein I | 138  | 6.00E-32  | COG1495 | O  |
| ZMO1669 | 1715258 | 1715815 | 2  | 558  | ZP_000966  | ubiquinone biosynthesis protein I  | 213  | 2.00E-54  | COG2941 | H  |
| ZMO1670 | 1715822 | 1716253 | 2  | 432  |            | hypothetical protein               |      |           | -       | -  |
| ZMO1671 | 1716363 | 1716782 | 3  | 420  | ZP_000966  | conserved hypothetical protein     | 57   | 7.00E-08  | -       | -  |
| ZMO1672 | 1716917 | 1717396 | 2  | 480  | ZP_000966  | conserved hypothetical protein     | 83.2 | 2.00E-15  | -       | -  |
| ZMO1673 | 1718322 | 1717507 | -1 | 816  | NP_519621  | putative oxidoreductase            | 270  | 2.00E-71  | COG0656 | R  |
| ZMO1674 | 1718481 | 1718359 | -1 | 123  |            | hypothetical protein               |      |           | -       | -  |
| ZMO1675 | 1719276 | 1718512 | -1 | 765  | ZP_000958  | protein-disulfide isomerase        | 175  | 9.00E-43  | COG1651 | O  |
| ZMO1676 | 1720177 | 1719533 | -2 | 645  | ZP_000958  | conserved hypothetical protein     | 117  | 1.00E-25  | COG5389 | S  |
| ZMO1677 | 1720215 | 1721336 | 3  | 1122 | ZP_000958  | A/G-specific DNA glycosylase       | 363  | 3.00E-99  | COG1194 | L  |
| ZMO1678 | 1722251 | 1721343 | -3 | 909  | ZP_000955  | prephenate dehydratase             | 285  | 7.00E-76  | COG0077 | E  |
| ZMO1679 | 1723225 | 1722353 | -2 | 873  | ZP_000955  | Rossmann fold nucleotide-bindin    | 317  | 2.00E-85  | COG1611 | R  |
| ZMO1680 | 1723930 | 1723274 | -2 | 657  | ZP_000960  | conserved hypothetical protein     | 137  | 2.00E-31  | COG3921 | S  |
| ZMO1681 | 1724393 | 1726087 | 2  | 1695 | BAC65228   | aspartate:alanine antiporter       | 684  | 0         | COG2985 | R  |
| ZMO1682 | 1726117 | 1727709 | 1  | 1593 | AAK58507   | L-aspartate beta-decarboxylase     | 758  | 0         | COG0436 | E  |
| ZMO1683 | 1727805 | 1728905 | 3  | 1101 | NP_799884  | L-asparaginase II, periplasmic     | 289  | 7.00E-77  | COG0252 | EJ |
| ZMO1684 | 1729367 | 1730527 | 2  | 1161 | NP_949645  | phosphoserine aminotransferase     | 531  | 1.00E-150 | COG1932 | HE |
| ZMO1685 | 1730599 | 1732182 | 1  | 1584 | ZP_000553  | phosphoglycerate dehydrogenas      | 666  | 0         | COG0111 | HE |
| ZMO1686 | 1732379 | 1733494 | 2  | 1116 | ZP_000935  | ATP phosphoribosyltransferase i    | 320  | 3.00E-86  | COG3705 | E  |
| ZMO1687 | 1733559 | 1734848 | 3  | 1290 | ZP_000935  | adenylosuccinate synthase          | 643  | 0         | COG0104 | F  |
| ZMO1688 | 1735759 | 1734941 | -2 | 819  | ZP_000938  | aminomethyltransferase related I   | 235  | 8.00E-61  | COG0354 | R  |
| ZMO1689 | 1735806 | 1737146 | 3  | 1341 | ZP_000139  | dihydroorotase and related cyclic  | 540  | 1.00E-152 | COG0044 | F  |

|         |         |         |    |                 |                                              |      |           |         |    |
|---------|---------|---------|----|-----------------|----------------------------------------------|------|-----------|---------|----|
| ZMO1690 | 1737595 | 1738536 | 1  | 942 ZP_0009662  | heat shock protein, DnaJ-class n             | 372  | 1.00E-102 | COG2214 | O  |
| ZMO1691 | 1738817 | 1739839 | 2  | 1023 ZP_0009662 | conserved hypothetical membran               | 178  | 1.00E-43  | COG1295 | S  |
| ZMO1692 | 1739850 | 1740668 | 3  | 819 ZP_0009662  | enoyl-[acyl-carrier-protein] reduc           | 410  | 1.00E-113 | COG0623 | I  |
| ZMO1693 | 1740665 | 1741741 | 2  | 1077 ZP_0009666 | chorismate synthase                          | 551  | 1.00E-156 | COG0082 | E  |
| ZMO1694 | 1744297 | 1741823 | -2 | 2475 ZP_0009577 | outer membrane receptor protein              | 401  | 1.00E-110 | COG1629 | P  |
| ZMO1695 | 1745100 | 1744567 | -1 | 534 NP_422538   | conserved hypothetical protein               | 137  | 1.00E-31  | COG3786 | S  |
| ZMO1696 | 1746274 | 1745264 | -2 | 1011 NP_108002  | alginate lyase                               | 440  | 1.00E-122 | COG0604 | CR |
| ZMO1697 | 1746392 | 1746736 | 2  | 345 NP_108001   | conserved hypothetical protein               | 170  | 5.00E-42  | COG1733 | K  |
| ZMO1698 | 1748036 | 1746918 | -3 | 1119 ZP_0009582 | GTP cyclohydrolase II                        | 321  | 1.00E-86  | COG0807 | H  |
| ZMO1699 | 1748808 | 1748005 | -1 | 804 ZP_0009582  | exonuclease III                              | 337  | 1.00E-91  | COG0708 | L  |
| ZMO1700 | 1749468 | 1749896 | 3  | 429             | hypothetical protein                         | -    | -         | -       | -  |
| ZMO1701 | 1750588 | 1749905 | -2 | 684 ZP_0009582  | outer membrane lipoprotein-sorti             | 192  | 3.00E-48  | COG2834 | M  |
| ZMO1702 | 1753101 | 1750672 | -1 | 2430 ZP_0009653 | DNA segregation ATPase FtsK/S                | 763  | 0         | COG1674 | D  |
| ZMO1703 | 1753261 | 1754478 | 1  | 1218 ZP_0009385 | 2-polyprenyl-6-methoxyphenol h               | 397  | 1.00E-109 | COG0654 | HC |
| ZMO1704 | 1755208 | 1754522 | -2 | 687 AG3011      | ATP-dependent proteinase LA2 I               | 108  | 6.00E-23  | COG2802 | R  |
| ZMO1705 | 1756074 | 1755166 | -1 | 909 NP_418929   | thioredoxin                                  | 153  | 5.00E-36  | COG3118 | O  |
| ZMO1706 | 1756171 | 1756299 | 1  | 129             | hypothetical protein                         | -    | -         | -       | -  |
| ZMO1707 | 1756289 | 1756900 | 2  | 612 ZP_0009374  | orotate phosphoribosyltransferas             | 214  | 8.00E-55  | COG0461 | F  |
| ZMO1708 | 1756922 | 1757692 | 2  | 771 ZP_0005421  | pyridoxal phosphate biosynthesis             | 333  | 3.00E-90  | COG0854 | H  |
| ZMO1709 | 1757689 | 1758093 | 1  | 405 ZP_0009437  | phosphopantetheinyl transferase              | 122  | 1.00E-27  | COG0736 | I  |
| ZMO1710 | 1758149 | 1759027 | 2  | 879 ZP_0009437  | signal peptidase I                           | 252  | 5.00E-66  | COG0681 | U  |
| ZMO1711 | 1759037 | 1760155 | 2  | 1119 ZP_0009437 | permease, predicted                          | 288  | 2.00E-76  | COG0628 | U  |
| ZMO1712 | 1760788 | 1760237 | -2 | 552 NP_284471   | peptidyl-prolyl isomerase                    | 134  | 1.00E-30  | COG0545 | O  |
| ZMO1713 | 1761274 | 1761074 | -2 | 201 NP_104296   | ribosomal protein S21                        | 114  | 5.00E-25  | COG0828 | J  |
| ZMO1714 | 1761429 | 1762049 | 3  | 621 ZP_0009666  | biopolymer transport ExbD2 prot              | 143  | 2.00E-33  | COG0848 | U  |
| ZMO1715 | 1762569 | 1762084 | -1 | 486 ZP_0009666  | biopolymer transport ExbD prote              | 127  | 6.00E-29  | COG0848 | U  |
| ZMO1716 | 1763439 | 1762702 | -1 | 738 ZP_0009666  | biopolymer transport ExbB protei             | 259  | 4.00E-68  | COG0811 | U  |
| ZMO1717 | 1764347 | 1763622 | -3 | 726 NP_901653   | conserved hypothetical protein               | 85.5 | 8.00E-16  | COG0810 | M  |
| ZMO1718 | 1764707 | 1765564 | 2  | 858 ZP_0009666  | conserved hypothetical protein               | 196  | 3.00E-49  | -       | -  |
| ZMO1719 | 1766273 | 1767178 | 2  | 906 Q03417      | SCR fructokinase                             | 625  | 1.00E-178 | COG1940 | KG |
| ZMO1720 | 1767757 | 1767386 | -2 | 372 ZP_0009644  | DNA-directed RNA polymerase, :               | 152  | 1.00E-36  | COG1758 | K  |
| ZMO1721 | 1768324 | 1767944 | -2 | 381 ZP_0003306  | lactoylglutathione lyase and relat           | 115  | 1.00E-25  | COG0346 | E  |
| ZMO1722 | 1769475 | 1768372 | -1 | 1104 NP_947300  | glutathione dependent formaldeh              | 660  | 0         | COG1062 | C  |
| ZMO1723 | 1770307 | 1769555 | -2 | 753 ZP_0009674  | conserved hypothetical protein               | 229  | 6.00E-59  | COG1496 | S  |
| ZMO1724 | 1772124 | 1770850 | -1 | 1275 ZP_0009652 | UDP-N-acetylglucosamine enolp                | 606  | 1.00E-172 | COG0766 | M  |
| ZMO1725 | 1772456 | 1772235 | -3 | 222 ZP_0009365  | conserved hypothetical protein               | 133  | 9.00E-31  | COG2127 | S  |
| ZMO1726 | 1772497 | 1772748 | 1  | 252             | hypothetical protein                         | -    | -         | -       | -  |
| ZMO1727 | 1772893 | 1774104 | 1  | 1212 ZP_0009365 | aspartate/tyrosine/aromatic amin             | 643  | 0         | COG0436 | E  |
| ZMO1728 | 1774590 | 1774111 | -1 | 480             | hypothetical protein                         | -    | -         | -       | -  |
| ZMO1729 | 1774956 | 1774717 | -1 | 240 ZP_0009437  | conserved hypothetical protein               | 110  | 7.00E-24  | -       | -  |
| ZMO1730 | 1775825 | 1775058 | -3 | 768 ZP_0009438  | serine acetyltransferase                     | 295  | 4.00E-79  | COG1045 | E  |
| ZMO1731 | 1776030 | 1776176 | 3  | 147             | hypothetical protein                         | -    | -         | -       | -  |
| ZMO1732 | 1776712 | 1776176 | -2 | 537 AAD33340    | alkyl hydroperoxide reductase                | 191  | 6.00E-48  | COG0450 | O  |
| ZMO1733 | 1776907 | 1777848 | 1  | 942 ZP_0009467  | transcriptional regulator, oxidativ          | 407  | 1.00E-112 | COG0583 | K  |
| ZMO1734 | 1778201 | 1779388 | 2  | 1188 NP_419983  | conserved hypothetical protein               | 239  | 7.00E-62  | -       | -  |
| ZMO1735 | 1780310 | 1779402 | -3 | 909 NP_279218   | LPS glycosyltransferase; Lpg                 | 107  | 3.00E-22  | COG0438 | M  |
| ZMO1736 | 1780569 | 1780411 | -1 | 159             | hypothetical protein                         | -    | -         | -       | -  |
| ZMO1737 | 1780542 | 1780685 | 3  | 144             | hypothetical protein                         | -    | -         | -       | -  |
| ZMO1738 | 1781537 | 1780743 | -3 | 795 ZP_0009676  | two-component response regula                | 412  | 1.00E-114 | COG3279 | KT |
| ZMO1739 | 1782777 | 1781545 | -1 | 1233 ZP_0009676 | two-component signal transducti              | 377  | 1.00E-103 | COG3275 | T  |
| ZMO1740 | 1783194 | 1782928 | -1 | 267 NP_420995   | conserved hypothetical protein               | 120  | 8.00E-27  | -       | -  |
| ZMO1741 | 1785055 | 1783253 | -2 | 1803 ZP_0009601 | membrane GTPase LepA                         | 983  | 0         | COG0481 | M  |
| ZMO1742 | 1785049 | 1785177 | 1  | 129             | hypothetical protein                         | -    | -         | -       | -  |
| ZMO1743 | 1786069 | 1785167 | -2 | 903 ZP_0009397  | diadenosine tetraphosphate / s               | 185  | 9.00E-46  | COG0639 | T  |
| ZMO1744 | 1786148 | 1786288 | 2  | 141             | hypothetical protein                         | -    | -         | -       | -  |
| ZMO1745 | 1788914 | 1787931 | -2 | 984 ZP_0009580  | methionine synthase I (cobalami              | 761  | 0         | COG1410 | E  |
| ZMO1746 | 1790016 | 1788967 | -1 | 1050 ZP_0009580 | methionine synthase I, cobalamii             | 481  | 1.00E-134 | COG0646 | E  |
| ZMO1747 | 1790990 | 1790091 | -3 | 900 AAD19402    | 5,10-methylenetetrahydrofolate r             | 377  | 1.00E-103 | COG0685 | E  |
| ZMO1748 | 1791939 | 1791001 | -1 | 939 ZP_0009580  | transcriptional regulators, predict          | 270  | 2.00E-71  | COG0500 | QR |
| ZMO1749 | 1792197 | 1793306 | 3  | 1110 NP_521080  | possible lipoprotein precursor (va           | 162  | 8.00E-39  | COG2853 | M  |
| ZMO1750 | 1793789 | 1793457 | -3 | 333 ZP_0013837  | conserved hypothetical protein               | 50.4 | 7.00E-06  | COG5513 | S  |
| ZMO1751 | 1794718 | 1795017 | 1  | 300             | hypothetical protein                         | -    | -         | -       | -  |
| ZMO1752 | 1795195 | 1795476 | 1  | 282             | hypothetical protein                         | -    | -         | -       | -  |
| ZMO1753 | 1795811 | 1796638 | 2  | 828 NP_422002   | ferredoxin-NADP reductase                    | 335  | 4.00E-91  | COG1018 | C  |
| ZMO1754 | 1798150 | 1796780 | -2 | 1371 NP_463378  | NAD-dependent aldehyde dehyd                 | 461  | 1.00E-128 | COG1012 | C  |
| ZMO1755 | 1799356 | 1798838 | -2 | 519 Q9Z671      | [TYS] thymidylate synthase (TS) (TSas        | 342  | 2.00E-93  | COG0207 | F  |
| ZMO1756 | 1799728 | 1801083 | 1  | 1356 ZP_000865  | H <sup>+</sup> /gluconate symporter and rela | 472  | 1.00E-132 | COG2610 | GE |
| ZMO1757 | 1801196 | 1801693 | 2  | 498 ZP_0003355  | gluconate kinase                             | 181  | 6.00E-45  | COG3265 | G  |
| ZMO1758 | 1802803 | 1801769 | -2 | 1035 ZP_000962  | DNA uptake lipoprotein                       | 338  | 1.00E-91  | COG4105 | R  |
| ZMO1759 | 1803913 | 1802963 | -2 | 951 AAN33038    | conserved hypothetical protein               | 108  | 1.00E-22  | COG3440 | V  |
| ZMO1760 | 1804694 | 1804008 | -3 | 687 ZP_000949   | ABC-type branched-chain amino                | 264  | 2.00E-69  | -       | -  |
| ZMO1761 | 1805301 | 1806188 | 3  | 888 ZP_000949   | methyltransferases, predicted                | 281  | 1.00E-74  | COG0313 | R  |
| ZMO1762 | 1806181 | 1806567 | 1  | 387 ZP_0009493  | endonuclease distantly related to            | 117  | 6.00E-26  | COG0792 | L  |
| ZMO1763 | 1807231 | 1806617 | -2 | 615             | hypothetical protein                         | -    | -         | -       | -  |
| ZMO1764 | 1808711 | 1807290 | -3 | 1422 NP_420322  | peptidoglycan binding domain pr              | 434  | 1.00E-120 | COG2989 | S  |
| ZMO1765 | 1809016 | 1808861 | -2 | 156             | hypothetical protein                         | -    | -         | -       | -  |

|         |         |         |    |      |             |                                    |      |           |         |    |
|---------|---------|---------|----|------|-------------|------------------------------------|------|-----------|---------|----|
| ZMO1766 | 1809591 | 1809007 | -1 | 585  | NP_719514   | magnesium transporter, putative    | 149  | 6.00E-35  | COG0598 | P  |
| ZMO1767 | 1810925 | 1810065 | -3 | 861  | AAF61451    | UDPG-pyrophosphorylase             | 338  | 1.00E-91  | COG1210 | M  |
| ZMO1768 | 1812315 | 1811056 | -1 | 1260 | Q9Z661 DCD  | diaminopimelate decarboxylase (    | 818  | 0         | COG0019 | E  |
| ZMO1769 | 1812580 | 1812335 | -2 | 246  |             | hypothetical protein               |      |           | -       | -  |
| ZMO1770 | 1813986 | 1812586 | -1 | 1401 | Q9Z660 ARL  | argininosuccinate lyase (arginos   | 916  | 0         | COG0165 | E  |
| ZMO1771 | 1815464 | 1814313 | -3 | 1152 | AAD19418    | NADH-dependent butanol dehyd       | 769  | 0         | COG1979 | C  |
| ZMO1772 | 1815702 | 1816697 | 3  | 996  | ZP_000861   | NADPH:quinone reductase/oxid       | 358  | 1.00E-97  | COG0604 | CR |
| ZMO1773 | 1817581 | 1816757 | -2 | 825  | ZP_000236   | aldo/keto reductases               | 314  | 1.00E-84  | COG0656 | R  |
| ZMO1774 | 1817740 | 1817627 | -2 | 114  |             | hypothetical protein               |      |           | -       | -  |
| ZMO1775 | 1818385 | 1818056 | -2 | 330  |             | hypothetical protein               |      |           | -       | -  |
| ZMO1776 | 1818907 | 1821462 | 1  | 2556 | NP_636429   | aminopeptidase N                   | 627  | 1.00E-178 | COG0308 | E  |
| ZMO1777 | 1821816 | 1822856 | 3  | 1041 | NP_419983   | conserved hypothetical protein     | 230  | 3.00E-59  | -       | -  |
| ZMO1778 | 1823897 | 1822884 | -3 | 1014 | NP_437834   | conserved hypothetical membrar     | 273  | 4.00E-72  | COG2899 | S  |
| ZMO1779 | 1824507 | 1824100 | -1 | 408  |             | hypothetical protein               |      |           | -       | -  |
| ZMO1780 | 1824851 | 1824549 | -3 | 303  | NP_826883   | conserved hypothetical protein     | 66.6 | 1.00E-10  | COG1359 | S  |
| ZMO1781 | 1826133 | 1825009 | -1 | 1125 | NP_522075   | conserved hypothetical transmer    | 151  | 2.00E-35  | COG0668 | M  |
| ZMO1782 | 1826318 | 1826587 | 2  | 270  |             | hypothetical protein               |      |           | -       | -  |
| ZMO1783 | 1826571 | 1826278 | -1 | 294  |             | hypothetical protein               |      |           | -       | -  |
| ZMO1784 | 1826764 | 1827897 | 1  | 1134 | NP_825693   | conserved hypothetical transmer    | 68.6 | 2.00E-10  | -       | -  |
| ZMO1785 | 1828788 | 1828087 | -1 | 702  | NP_522075   | conserved hypothetical transmer    | 87   | 3.00E-16  | COG0668 | M  |
| ZMO1786 | 1828973 | 1829938 | 2  | 966  |             | hypothetical protein               |      |           | -       | -  |
| ZMO1787 | 1830256 | 1830014 | -2 | 243  |             | hypothetical protein               |      |           | -       | -  |
| ZMO1788 | 1832443 | 1830605 | -2 | 1839 |             | hypothetical protein               |      |           | -       | -  |
| ZMO1789 | 1832418 | 1832552 | 3  | 135  |             | hypothetical protein               |      |           | -       | -  |
| ZMO1790 | 1832663 | 1834450 | 2  | 1788 | ZP_0009583  | ABC-type multidrug transport sys   | 720  | 0         | COG1132 | V  |
| ZMO1791 | 1834587 | 1834462 | -1 | 126  |             | hypothetical protein               |      |           | -       | -  |
| ZMO1792 | 1836418 | 1834568 | -2 | 1851 | NP_421838   | dihydroxy-acid dehydratase         | 973  | 0         | COG0129 | EG |
| ZMO1793 | 1836523 | 1837437 | 1  | 915  | NP_421839   | isoleucine biosynthesis transcrip  | 315  | 9.00E-85  | COG0583 | K  |
| ZMO1794 | 1838126 | 1837809 | -3 | 318  | ZP_0009308  | conserved hypothetical protein     | 131  | 3.00E-30  | COG4530 | S  |
| ZMO1795 | 1838158 | 1838394 | 1  | 237  |             | hypothetical protein               |      |           | -       | -  |
| ZMO1796 | 1838410 | 1839771 | 1  | 1362 | ZP_0009308  | 5-enolpyruvylshikimate-3-phosph    | 585  | 1.00E-166 | COG0128 | E  |
| ZMO1797 | 1839768 | 1840400 | 3  | 633  | ZP_0009473  | cytidylate kinase                  | 207  | 1.00E-52  | COG0283 | F  |
| ZMO1798 | 1840667 | 1842373 | 2  | 1707 | ZP_0009472  | ribosomal protein S1               | 923  | 0         | COG0539 | J  |
| ZMO1799 | 1842402 | 1842503 | 3  | 102  |             | hypothetical protein               |      |           | -       | -  |
| ZMO1800 | 1843336 | 1842503 | -2 | 834  | NP_792432   | phenazine biosynthesis protein, I  | 328  | 6.00E-89  | COG0384 | R  |
| ZMO1801 | 1843616 | 1843900 | 2  | 285  | Q9X4E2 IHF  | integration host factor beta-subu  | 116  | 8.00E-26  | COG0776 | L  |
| ZMO1802 | 1844247 | 1844080 | -1 | 168  |             | hypothetical protein               |      |           | -       | -  |
| ZMO1803 | 1844394 | 1844284 | -1 | 111  |             | hypothetical protein               |      |           | -       | -  |
| ZMO1804 | 1844396 | 1845829 | 2  | 1434 | NP_644648   | amino acid transporter             | 541  | 1.00E-153 | COG0531 | E  |
| ZMO1805 | 1846539 | 1845892 | -1 | 648  | O33512 GPH  | phosphoglycolate phosphatase (     | 95.9 | 5.00E-19  | COG0546 | R  |
| ZMO1806 | 1847365 | 1846772 | -2 | 594  | NP_810376   | acetyltransferase, putative        | 251  | 6.00E-66  | COG0110 | R  |
| ZMO1807 | 1847550 | 1849934 | 3  | 2385 | ZP_0009577  | outer membrane receptor protein    | 99.8 | 2.00E-19  | COG1629 | P  |
| ZMO1808 | 1850248 | 1849988 | -2 | 261  | ZP_0005360  | conserved hypothetical protein     | 108  | 3.00E-23  | COG2914 | S  |
| ZMO1809 | 1850935 | 1850267 | -2 | 669  | ZP_0005355  | NADH:ubiquinone oxidoreductas      | 263  | 3.00E-69  | COG4660 | C  |
| ZMO1810 | 1851557 | 1850931 | -3 | 627  | ZP_0005355  | NADH:ubiquinone oxidoreductas      | 208  | 6.00E-53  | COG4659 | C  |
| ZMO1811 | 1852708 | 1851638 | -2 | 1071 | ZP_0005355  | NADH:ubiquinone oxidoreductas      | 469  | 1.00E-131 | COG4658 | C  |
| ZMO1812 | 1854171 | 1852714 | -1 | 1458 | ZP_0005355  | NADH:ubiquinone oxidoreductas      | 555  | 1.00E-156 | COG4656 | C  |
| ZMO1813 | 1854844 | 1854188 | -2 | 657  | ZP_0005356  | NADH:ubiquinone oxidoreductas      | 226  | 3.00E-58  | COG2878 | C  |
| ZMO1814 | 1855442 | 1854867 | -3 | 576  | ZP_0005356  | NADH:ubiquinone oxidoreductas      | 283  | 1.00E-75  | COG4657 | C  |
| ZMO1815 | 1858118 | 1855917 | -3 | 2202 | ZP_0009275  | outer membrane receptor protein    | 464  | 1.00E-129 | COG1629 | P  |
| ZMO1816 | 1858831 | 1860537 | 1  | 1707 | AAC99364    | transcriptional regulator NifA     | 645  | 0         | COG3604 | KT |
| ZMO1817 | 1860746 | 1862215 | 2  | 1470 | AAC99365    | nitrogen fixation protein nifB     | 704  | 0         | COG0535 | R  |
| ZMO1818 | 1862255 | 1862449 | 2  | 195  | NP_768379   | ferredoxin, FdxN                   | 108  | 2.00E-23  | COG1145 | C  |
| ZMO1819 | 1862483 | 1862737 | 2  | 255  | AAG35393    | NifZ; FixU                         | 113  | 7.00E-25  | -       | -  |
| ZMO1820 | 1862758 | 1862970 | 1  | 213  | AAK27735    | nitrogen fixation protein FixU     | 100  | 5.00E-21  | COG5554 | Q  |
| ZMO1821 | 1862970 | 1863830 | 3  | 861  | AAG35394    | conserved hypothetical protein     | 282  | 6.00E-75  | -       | -  |
| ZMO1822 | 1865969 | 1863846 | -3 | 2124 | NP_942765   | ferrisiderophore receptor protein, | 562  | 1.00E-159 | COG1629 | P  |
| ZMO1823 | 1866350 | 1867237 | 2  | 888  | Q9ZIE4 NIFH | nitrogenase iron protein, nitronge | 534  | 1.00E-151 | COG1348 | P  |
| ZMO1824 | 1867248 | 1868723 | 3  | 1476 | AAD05047    | nitrogenase FeMo alpha subunit,    | 828  | 0         | COG2710 | C  |
| ZMO1825 | 1868783 | 1870318 | 2  | 1536 | AAD05048    | nitrogenase FeMo beta subunit      | 843  | 0         | COG2710 | C  |
| ZMO1826 | 1870387 | 1871841 | 1  | 1455 | AAG27065    | nitrogenase reductase iron-molib   | 719  | 0         | COG2710 | C  |
| ZMO1827 | 1871838 | 1873208 | 3  | 1371 | AAG27066    | nitrogenase molybdenum-iron pr     | 561  | 1.00E-159 | COG2710 | C  |
| ZMO1828 | 1873201 | 1873695 | 1  | 495  | AAG27067    | nitrogenase molybdenum-iron pr     | 216  | 1.00E-55  | -       | -  |
| ZMO1829 | 1873685 | 1874149 | 2  | 465  | NP_659739   | conserved hypothetical protein     | 171  | 3.00E-42  | -       | -  |
| ZMO1830 | 1874500 | 1873991 | -2 | 510  | ZP_0005437  | ferredoxin, FdxB                   | 130  | 8.00E-30  | COG1145 | C  |
| ZMO1831 | 1874486 | 1875073 | 2  | 588  | AAG27071    | nitrogen fixation protein nifQ     | 211  | 5.00E-54  | -       | -  |
| ZMO1832 | 1875249 | 1875572 | 3  | 324  | AAG27072    | conserved hypothetical protein     | 126  | 7.00E-29  | COG0316 | S  |
| ZMO1833 | 1875630 | 1875872 | 3  | 243  | AAG27073    | nitrogen fixation protein, NifU    | 90.1 | 9.00E-18  | COG0694 | O  |
| ZMO1834 | 1875895 | 1877052 | 1  | 1158 | P57794 NIFS | nitrogenase metallocusters bios    | 494  | 1.00E-138 | COG1104 | E  |
| ZMO1835 | 1877109 | 1878269 | 3  | 1161 | AAF13763    | homocitrate synthase               | 742  | 0         | COG0119 | E  |
| ZMO1836 | 1878314 | 1878646 | 2  | 333  | P26481 NIFV | nitrogenase stabilizing/protective | 95.1 | 2.00E-19  | -       | -  |
| ZMO1837 | 1878718 | 1879587 | 1  | 870  | NP_946353   | molybdenum transport system pr     | 223  | 3.00E-57  | COG0157 | H  |
| ZMO1838 | 1879920 | 1879714 | -1 | 207  | NP_103048   | molybdo-pterin binding protein     | 85.1 | 3.00E-16  | COG3585 | H  |
| ZMO1839 | 1880116 | 1880232 | 1  | 117  |             | hypothetical protein               |      |           | -       | -  |
| ZMO1840 | 1880847 | 1880308 | -1 | 540  | NP_767926   | putative isochorismatase family    | 110  | 1.00E-23  | COG1335 | Q  |
| ZMO1841 | 1881493 | 1880966 | -2 | 528  | ZP_0005355  | sigma E factor positive regulator  | 86   | 4.00E-16  | COG3086 | T  |



|         |         |         |    |      |            |                                       |      |           |         |      |
|---------|---------|---------|----|------|------------|---------------------------------------|------|-----------|---------|------|
| ZMO1842 | 1882511 | 1881471 | -3 | 1041 | NP_699476  | nosX protein                          | 246  | 4.00E-64  | COG1477 | H    |
| ZMO1843 | 1882665 | 1882769 | 3  | 105  |            | hypothetical protein                  |      |           |         |      |
| ZMO1844 | 1883923 | 1882853 | -2 | 1071 | NP_522622  | probable oxidoreductase               | 362  | 5.00E-99  | COG0673 | R    |
| ZMO1845 | 1884354 | 1884067 | -1 | 288  | NP_396628  | alkylphosphonate uptake protein       | 108  | 2.00E-23  | COG2824 | P    |
| ZMO1846 | 1885272 | 1884493 | -1 | 780  | NP_348608  | ABC-type Fe3+ transport system        | 183  | 3.00E-45  | COG1120 | PH   |
| ZMO1847 | 1886249 | 1885242 | -3 | 1008 | NP_907313  | ABC-type Fe3+ transport system        | 271  | 1.00E-71  | COG0609 | P    |
| ZMO1848 | 1887128 | 1886262 | -3 | 867  | NP_616161  | ABC-type Fe3+ transport system        | 226  | 4.00E-58  | COG0614 | P    |
| ZMO1849 | 1888120 | 1889850 | 1  | 1731 | AAF13754   | conserved hypothetical protein        | 933  | 0         | -       | -    |
| ZMO1850 | 1890318 | 1889962 | -1 | 357  | ZP_0009247 | conserved hypothetical protein        | 153  | 7.00E-37  | -       | -    |
| ZMO1851 | 1890797 | 1890321 | -3 | 477  | ZP_0009247 | flavodoxins                           | 224  | 6.00E-58  | COG0716 | C    |
| ZMO1852 | 1890873 | 1891019 | 3  | 147  |            | hypothetical protein                  |      |           |         |      |
| ZMO1853 | 1891958 | 1891068 | -3 | 891  | NP_531597  | dihydrodipicolinate synthase          | 185  | 9.00E-46  | COG0329 | EM   |
| ZMO1854 | 1893347 | 1892109 | -3 | 1239 | ZP_000050  | transcriptional regulator             | 489  | 1.00E-137 | COG1167 | KE   |
| ZMO1855 | 1893683 | 1894438 | 2  | 756  | NP_461372  | putative GMP synthase, glutamir       | 265  | 5.00E-70  | COG0518 | F    |
| ZMO1856 | 1895861 | 1894605 | -3 | 1257 | NP_461314  | transport protein, putative           | 328  | 2.00E-88  | COG0477 | GEPR |
| ZMO1857 | 1896023 | 1896916 | 2  | 894  | NP_102796  | transcriptional regulator, probabl    | 308  | 1.00E-82  | COG0583 | K    |
| ZMO1858 | 1902155 | 1902289 | 2  | 135  |            | hypothetical protein                  |      |           |         |      |
| ZMO1859 | 1904490 | 1905614 | 3  | 1125 | NP_642819  | regulator of pathogenicity factors    | 380  | 1.00E-104 | COG3659 | M    |
| ZMO1860 | 1906393 | 1905689 | -2 | 705  | NP_107091  | similar to nodulin 21                 | 255  | 6.00E-67  | COG1814 | S    |
| ZMO1861 | 1907937 | 1906939 | -1 | 999  | ZP_001343  | dioxygenases related to 2-nitropr     | 222  | 1.00E-56  | COG2070 | R    |
| ZMO1862 | 1909117 | 1909013 | -2 | 105  |            | hypothetical protein                  |      |           |         |      |
| ZMO1863 | 1909727 | 1909240 | -1 | 483  | CAE80593   | putative phosphatase                  | 63.5 | 1.00E-09  | -       | -    |
| ZMO1864 | 1910097 | 1910576 | 3  | 480  | BAA19758   | transposase                           | 67   | 1.00E-10  | COG3293 | L    |
| ZMO1865 | 1916005 | 1916139 | 1  | 135  |            | hypothetical protein                  |      |           |         |      |
| ZMO1866 | 1919292 | 1917658 | -1 | 1635 | ZP_0009357 | hydrolase of the metallo-beta-lac     | 667  | 0         | COG0595 | R    |
| ZMO1867 | 1920167 | 1919346 | -3 | 822  | ZP_0009357 | transcriptional regulator, putative   | 337  | 2.00E-91  | COG1521 | K    |
| ZMO1868 | 1920999 | 1920202 | -1 | 798  | NP_420743  | biotin protein ligase                 | 152  | 5.00E-36  | COG0340 | H    |
| ZMO1869 | 1921829 | 1921002 | -3 | 828  | ZP_0009675 | ribonuclease I                        | 116  | 4.00E-25  | COG3719 | J    |
| ZMO1870 | 1922827 | 1921850 | -2 | 978  | ZP_0009676 | nicotinate-nucleotide pyrophosph      | 326  | 5.00E-88  | COG0157 | H    |
| ZMO1871 | 1923847 | 1922855 | -2 | 993  | ZP_0009605 | quinolinate synthase                  | 492  | 1.00E-138 | COG0379 | H    |
| ZMO1872 | 1924488 | 1923868 | -1 | 621  | ZP_0009605 | conserved hypothetical protein        | 80.1 | 3.00E-14  | -       | -    |
| ZMO1873 | 1924856 | 1924530 | -3 | 327  | ZP_0009342 | glutaredoxin-related protein          | 143  | 8.00E-34  | COG0278 | O    |
| ZMO1874 | 1925138 | 1924911 | -3 | 228  | ZP_0009342 | stress-induced morphogen (activ       | 99.4 | 1.00E-20  | COG0271 | T    |
| ZMO1875 | 1925511 | 1925149 | -1 | 363  | ZP_0009341 | conserved hypothetical protein        | 102  | 2.00E-21  | COG5467 | S    |
| ZMO1876 | 1925874 | 1926371 | 3  | 498  | NP_420132  | conserved hypothetical protein        | 85.5 | 4.00E-16  | COG3827 | S    |
| ZMO1877 | 1927376 | 1926531 | -3 | 846  | NP_637572  | glutamine cyclotransferase            | 268  | 1.00E-70  | COG3823 | O    |
| ZMO1878 | 1927522 | 1929387 | 1  | 1866 | AAP46185   | valyl-tRNA synthetase                 | 991  | 0         | COG0525 | J    |
| ZMO1879 | 1930308 | 1931309 | 3  | 1002 | ZP_0009606 | delta-aminolevulinic acid dehydr      | 478  | 1.00E-133 | COG0113 | H    |
| ZMO1880 | 1931302 | 1931910 | 1  | 609  |            | hypothetical protein                  |      |           |         |      |
| ZMO1881 | 1932660 | 1932776 | 3  | 117  |            | hypothetical protein                  |      |           |         |      |
| ZMO1882 | 1932784 | 1933770 | 1  | 987  | NP_415243  | transport protein, putative           | 263  | 5.00E-69  | COG3180 | R    |
| ZMO1883 | 1934831 | 1933896 | -3 | 936  | ZP_0000475 | phosphoglycerate dehydrogenas         | 262  | 6.00E-69  | COG0111 | HE   |
| ZMO1884 | 1935521 | 1934892 | -3 | 630  | NP_927865  | conserved hypothetical protein        | 315  | 3.00E-85  | COG1636 | S    |
| ZMO1885 | 1936778 | 1935708 | -3 | 1071 | ZP_000516  | NADH:flavin oxidoreductases, xc       | 431  | 1.00E-119 | COG1902 | C    |
| ZMO1886 | 1938074 | 1936971 | -3 | 1104 | NP_386204  | transport protein, putative           | 293  | 5.00E-78  | COG3180 | R    |
| ZMO1887 | 1938645 | 1938085 | -1 | 561  | BAA15678   | Isochorismatase (EC 3.3.2.1)          | 169  | 2.00E-41  | COG1335 | Q    |
| ZMO1888 | 1939122 | 1938979 | -1 | 144  |            | hypothetical protein                  |      |           |         |      |
| ZMO1889 | 1940043 | 1939174 | -1 | 870  | ZP_0009375 | SAM-dependent methyltransfera         | 334  | 1.00E-90  | COG1092 | R    |
| ZMO1890 | 1941296 | 1940076 | -3 | 1221 | ZP_0005459 | Zn-dependent peptidases, predic       | 312  | 9.00E-84  | COG0612 | R    |
| ZMO1891 | 1942834 | 1941299 | -2 | 1536 | ZP_0009375 | threonine synthase                    | 598  | 1.00E-170 | COG0498 | E    |
| ZMO1892 | 1943260 | 1942916 | -2 | 345  | ZP_0009645 | conserved hypothetical protein        | 61.6 | 3.00E-09  | -       | -    |
| ZMO1893 | 1943496 | 1943597 | 3  | 102  |            | hypothetical protein                  |      |           |         |      |
| ZMO1894 | 1943502 | 1943317 | -1 | 186  |            | hypothetical protein                  |      |           |         |      |
| ZMO1895 | 1943628 | 1944635 | 3  | 1008 | ZP_0009645 | sugar kinases, ribokinase family      | 366  | 1.00E-100 | COG0524 | G    |
| ZMO1896 | 1945670 | 1944759 | -3 | 912  | ZP_0009492 | preprotein translocase subunit S      | 283  | 2.00E-75  | COG0341 | U    |
| ZMO1897 | 1947270 | 1945693 | -1 | 1578 | ZP_0009492 | preprotein translocase subunit S      | 588  | 1.00E-167 | COG0342 | U    |
| ZMO1898 | 1947624 | 1947283 | -1 | 342  | NP_697903  | preprotein translocase, YajC sub      | 106  | 1.00E-22  | COG1862 | U    |
| ZMO1899 | 1949475 | 1948510 | -1 | 966  | ZP_0009427 | 3-oxoacyl-[acyl-carrier-protein] s    | 397  | 1.00E-109 | COG0332 | I    |
| ZMO1900 | 1950527 | 1949478 | -3 | 1050 | ZP_0009427 | fatty acid/phospholipid biosynthe     | 391  | 1.00E-107 | COG0416 | I    |
| ZMO1901 | 1952003 | 1950936 | -3 | 1068 | ZP_0009385 | conserved hypothetical protein        | 135  | 1.00E-30  | -       | -    |
| ZMO1902 | 1952750 | 1952028 | -3 | 723  | ZP_0009385 | uroporphyrinogen-III synthase         | 107  | 3.00E-22  | COG1587 | H    |
| ZMO1903 | 1953711 | 1952791 | -1 | 921  | ZP_0009385 | porphobilinogen deaminase             | 270  | 2.00E-71  | COG0181 | H    |
| ZMO1904 | 1953713 | 1954804 | 2  | 1092 | ZP_0009385 | metal-dependent proteases with        | 459  | 1.00E-128 | COG0533 | O    |
| ZMO1905 | 1954805 | 1955827 | 2  | 1023 | ZP_0009385 | glycerol-3-phosphate dehydroge        | 315  | 1.00E-84  | COG0240 | C    |
| ZMO1906 | 1956441 | 1955908 | -1 | 534  | ZP_0009597 | translation initiation factor 3 (IF-3 | 270  | 1.00E-71  | COG0290 | J    |
| ZMO1907 | 1959228 | 1956559 | -1 | 2670 | ZP_0009672 | DNA mismatch repair ATPase (N         | 997  | 0         | COG0249 | L    |
| ZMO1908 | 1959784 | 1959296 | -2 | 489  | ZP_0009482 | small protein A (tmRNA-binding)       | 149  | 2.00E-35  | COG2913 | J    |
| ZMO1909 | 1960001 | 1960540 | 2  | 540  | ZP_0009482 | conserved hypothetical protein        | 123  | 1.00E-27  | -       | -    |
| ZMO1910 | 1960707 | 1961369 | 3  | 663  | ZP_0009331 | ribosomal protein L25 (general s      | 225  | 6.00E-58  | COG1825 | J    |
| ZMO1911 | 1961444 | 1962013 | 2  | 570  | ZP_0009331 | peptidyl-tRNA hydrolase               | 244  | 5.00E-64  | COG0193 | J    |
| ZMO1912 | 1962063 | 1963163 | 3  | 1101 | ZP_0009534 | GTPase, probable translation fac      | 580  | 1.00E-164 | COG0012 | J    |
| ZMO1913 | 1963494 | 1964444 | 3  | 951  | ZP_0009493 | glutathione synthase/ribosomal p      | 405  | 1.00E-112 | COG0189 | HJ   |
| ZMO1914 | 1965369 | 1964452 | -1 | 918  | ZP_0000473 | integrase/recombinase                 | 251  | 1.00E-65  | COG0582 | L    |
| ZMO1915 | 1966816 | 1965386 | -2 | 1431 | NP_889870  | biotin synthesis protein, putative    | 330  | 4.00E-89  | COG0132 | H    |
| ZMO1916 | 1967451 | 1966810 | -1 | 642  | NP_880813  | conserved hypothetical protein        | 136  | 3.00E-31  | -       | -    |
| ZMO1917 | 1968656 | 1967454 | -3 | 1203 | NP_889868  | 8-amino-7-oxononanoate syntha         | 401  | 1.00E-110 | COG0156 | H    |

|         |         |         |    |                 |                                     |      |           |         |      |
|---------|---------|---------|----|-----------------|-------------------------------------|------|-----------|---------|------|
| ZMO1918 | 1968726 | 1969991 | 3  | 1266 NP_884047  | adenosylmethionine-8-amino-7-c      | 543  | 1.00E-153 | COG0161 | H    |
| ZMO1919 | 1970458 | 1969991 | -2 | 468 ZP_0003873  | thiol-disulfide isomerase and thi   | 79.3 | 3.00E-14  | COG0526 | OC   |
| ZMO1920 | 1970774 | 1971193 | 2  | 420 NP_772219   | conserved hypothetical protein      | 77.8 | 4.00E-14  | -       | -    |
| ZMO1921 | 1971322 | 1973490 | 1  | 2169 ZP_0005462 | Primosomal protein N' (replicatio   | 667  | 0         | COG1198 | L    |
| ZMO1922 | 1974971 | 1973496 | -3 | 1476 ZP_0009362 | capsule polysaccharide export pi    | 296  | 5.00E-79  | COG3562 | M    |
| ZMO1923 | 1975292 | 1976767 | 2  | 1476 NP_885142  | capsular polysaccharide biosyntf    | 173  | 7.00E-42  | COG1368 | M    |
| ZMO1924 | 1977729 | 1976782 | -1 | 948 ZP_0005539  | collagenase and related protease    | 267  | 2.00E-70  | COG0826 | O    |
| ZMO1925 | 1979471 | 1977732 | -3 | 1740 ZP_0005539 | collagenase and related protease    | 371  | 1.00E-101 | COG0826 | O    |
| ZMO1926 | 1979595 | 1979708 | 3  | 114             | hypothetical protein                | -    | -         | -       | -    |
| ZMO1927 | 1981615 | 1979708 | -2 | 1908 ZP_0009431 | periplasmic serine proteases (Cl    | 472  | 1.00E-131 | COG0616 | OU   |
| ZMO1928 | 1981991 | 1982278 | 2  | 288 P48229 CH1  | heat shock protein groEs, 10 kDa    | 188  | 2.00E-47  | COG0234 | O    |
| ZMO1929 | 1982385 | 1984025 | 3  | 1641 JC2564     | heat shock protein groEL, 60 kDa    | 1024 | 0         | COG0459 | O    |
| ZMO1930 | 1984282 | 1985481 | 1  | 1200 NP_642539  | phage-related integrase             | 795  | 0         | COG0582 | L    |
| ZMO1931 | 1985478 | 1986644 | 3  | 1167 ZP_0013583 | conserved hypothetical protein      | 651  | 0         | COG4804 | S    |
| ZMO1932 | 1988336 | 1987551 | -3 | 786             | hypothetical protein                | -    | -         | -       | -    |
| ZMO1933 | 1989715 | 1988342 | -2 | 1374 NP_907780  | type I restriction-modification enz | 145  | 1.00E-33  | COG0732 | V    |
| ZMO1934 | 1991742 | 1989730 | -1 | 2013 NP_904837  | type I restriction-modification enz | 752  | 0         | COG0286 | V    |
| ZMO1935 | 1993428 | 1992724 | -1 | 705 NP_520729   | conserved hypothetical protein      | 246  | 3.00E-64  | COG5419 | S    |
| ZMO1936 | 1993041 | 1993811 | 3  | 771 ZP_0009138  | conserved hypothetical protein      | 433  | 1.00E-120 | COG5419 | S    |
| ZMO1937 | 1993866 | 1994207 | 3  | 342 ZP_0009138  | conserved hypothetical protein      | 217  | 3.00E-56  | -       | -    |
| ZMO1938 | 1994179 | 1995114 | 1  | 936 ZP_0002547  | conserved hypothetical protein      | 465  | 1.00E-130 | COG5534 | L    |
| ZMO1939 | 1995513 | 1995872 | 3  | 360 ZP_0002443  | ATPases involved in chromosom       | 213  | 6.00E-55  | COG1192 | D    |
| ZMO1940 | 1995958 | 1996572 | 1  | 615 ZP_0013585  | conserved hypothetical protein      | 317  | 7.00E-86  | -       | -    |
| ZMO1941 | 1996569 | 1997324 | 3  | 756 NP_520723   | type IV secretory pathway, conju    | 280  | 2.00E-74  | COG4959 | OU   |
| ZMO1942 | 1997998 | 1996949 | -2 | 1050 ZP_0002548 | type IV secretory pathway, VirD2    | 469  | 1.00E-131 | COG3843 | U    |
| ZMO1943 | 1998005 | 1999264 | 2  | 1260 ZP_0002548 | type IV secretory pathway, VirD2    | 747  | 0         | COG3843 | U    |
| ZMO1944 | 2000656 | 1999289 | -2 | 1368 NP_773256  | transcriptional regulatory protein  | 238  | 2.00E-61  | COG1167 | KE   |
| ZMO1945 | 2000759 | 2001646 | 2  | 888 ZP_000272   | predicted epimerase, PhzC/PhzF      | 176  | 5.00E-43  | COG0384 | R    |
| ZMO1946 | 2001676 | 2002419 | 1  | 744 NP_640740   | oxidoreductase (short-chain alco    | 236  | 3.00E-61  | COG1028 | IQR  |
| ZMO1947 | 2002476 | 2002922 | 3  | 447 NP_900598   | translational inhibitor protein     | 99   | 1.00E-20  | COG0251 | J    |
| ZMO1948 | 2002935 | 2003396 | 3  | 462 NP_250048   | conserved hypothetical protein      | 200  | 8.00E-51  | COG2606 | S    |
| ZMO1949 | 2003408 | 2004124 | 2  | 717 NP_745853   | NAD(P)H quinone oxidoreductas       | 317  | 2.00E-85  | COG2249 | R    |
| ZMO1950 | 2004121 | 2005305 | 1  | 1185 ZP_0003006 | aspartate/tyrosine/aromatic amin    | 421  | 1.00E-116 | COG0436 | E    |
| ZMO1951 | 2006220 | 2006927 | 3  | 708 NP_768922   | demethylmenaquinone methyltra       | 93.2 | 4.00E-18  | COG0684 | H    |
| ZMO1952 | 2007015 | 2007935 | 3  | 921 AAQ18192    | 3-methyl-2-oxobutanoate hydrox      | 293  | 3.00E-78  | COG0413 | H    |
| ZMO1953 | 2008020 | 2007892 | -1 | 129             | hypothetical protein                | -    | -         | -       | -    |
| ZMO1954 | 2008049 | 2009386 | 2  | 1338 T03562     | type IV secretory pathway, VirB1    | 181  | 2.00E-54  | COG2948 | U    |
| ZMO1955 | 2011159 | 2009462 | -2 | 1698 CAE80616   | malic enzyme, NAD-dependent         | 684  | 0         | COG0281 | C    |
| ZMO1956 | 2012974 | 2011304 | -2 | 1671 ZP_0009622 | ATPase involved in DNA repair       | 558  | 1.00E-158 | COG0497 | L    |
| ZMO1957 | 2014211 | 2013036 | -3 | 1176 ZP_0009597 | glycosyltransferase                 | 502  | 1.00E-141 | COG0438 | M    |
| ZMO1958 | 2014771 | 2014355 | -2 | 417             | hypothetical protein                | -    | -         | -       | -    |
| ZMO1959 | 2017861 | 2014820 | -2 | 3042 ZP_0009319 | ATPase involved in DNA repair/c     | 200  | 2.00E-49  | -       | -    |
| ZMO1960 | 2018050 | 2019399 | 1  | 1350            | hypothetical protein                | -    | -         | -       | -    |
| ZMO1961 | 2019543 | 2020706 | 3  | 1164 ZP_0001355 | conserved hypothetical protein      | 99.4 | 1.00E-19  | -       | -    |
| ZMO1962 | 2020697 | 2022124 | 2  | 1428 ZP_0007919 | two-component signal transducti     | 135  | 2.00E-30  | COG0642 | T    |
| ZMO1963 | 2023411 | 2022128 | -2 | 1284 AAN77499   | citrate synthase                    | 573  | 1.00E-162 | COG0372 | C    |
| ZMO1964 | 2025002 | 2023563 | -3 | 1440 ZP_0001512 | glutamyl- and glutamyl-tRNA sy      | 600  | 1.00E-170 | COG0008 | J    |
| ZMO1965 | 2025180 | 2027741 | 3  | 2562 ZP_0009512 | predicted membrane metal-bindi      | 365  | 2.00E-99  | COG0658 | R    |
| ZMO1966 | 2027792 | 2028781 | 2  | 990 NP_716708   | conserved hypothetical protein      | 115  | 1.00E-24  | -       | -    |
| ZMO1967 | 2028807 | 2029727 | 3  | 921 NP_767581   | beta-lactamase L2 precursor         | 275  | 6.00E-73  | COG2367 | V    |
| ZMO1968 | 2029967 | 2030092 | 2  | 126             | hypothetical protein                | -    | -         | -       | -    |
| ZMO1969 | 2031561 | 2030557 | -1 | 1005 ZP_0004325 | FOG: TPR repeat, SEL1 subfam        | 253  | 4.00E-66  | COG0790 | R    |
| ZMO1970 | 2032578 | 2031763 | -1 | 816 NP_948437   | 3-methyl-2-oxobutanoate hydrox      | 313  | 2.00E-84  | COG0413 | H    |
| ZMO1971 | 2033366 | 2032584 | -3 | 783 NP_386268   | pantoate--beta-alanine ligase       | 253  | 3.00E-66  | COG0414 | H    |
| ZMO1972 | 2033394 | 2033558 | 3  | 165             | hypothetical protein                | -    | -         | -       | -    |
| ZMO1973 | 2034222 | 2033587 | -1 | 636 ZP_0000775  | lysine efflux permease              | 204  | 7.00E-52  | COG1279 | R    |
| ZMO1974 | 2034300 | 2035208 | 3  | 909 ZP_0000775  | transcriptional regulator           | 271  | 1.00E-71  | COG0583 | K    |
| ZMO1975 | 2035205 | 2036137 | 2  | 933 ZP_0003417  | ornithine cyclodeaminase, mu-cr     | 233  | 3.00E-60  | COG2423 | E    |
| ZMO1976 | 2036408 | 2037265 | 2  | 858             | hypothetical protein                | -    | -         | -       | -    |
| ZMO1977 | 2037477 | 2038922 | 3  | 1446 ZP_0001471 | permeases of the major facilitato   | 410  | 1.00E-113 | COG0477 | GEPR |
| ZMO1978 | 2039887 | 2038958 | -2 | 930 NP_105340   | chromosome partitioning protein,    | 246  | 3.00E-64  | COG1475 | K    |
| ZMO1979 | 2040684 | 2039890 | -1 | 795 NP_945645   | chromosome partitioning protein,    | 304  | 1.00E-81  | COG1192 | D    |
| ZMO1980 | 2041346 | 2040687 | -3 | 660 NP_422548   | glucose inhibited division protein  | 123  | 2.00E-27  | COG0357 | M    |
| ZMO1981 | 2043115 | 2041349 | -2 | 1767 NP_699036  | glucose-inhibited division protein  | 571  | 1.00E-161 | COG0445 | D    |
| ZMO1982 | 2043152 | 2043283 | 2  | 132             | hypothetical protein                | -    | -         | -       | -    |
| ZMO1983 | 2043576 | 2044565 | 3  | 990 NP_299031   | conserved hypothetical protein      | 288  | 1.00E-76  | COG3386 | G    |
| ZMO1984 | 2044595 | 2045581 | 2  | 987 NP_299013   | sugar-phosphate dehydrogenase       | 526  | 1.00E-148 | COG0667 | C    |
| ZMO1985 | 2045683 | 2045820 | 1  | 138             | hypothetical protein                | -    | -         | -       | -    |
| ZMO1986 | 2046165 | 2048576 | 3  | 2412 ZP_0002744 | outer membrane receptor protei      | 652  | 0         | COG1629 | P    |
| ZMO1987 | 2048686 | 2048552 | -2 | 135             | hypothetical protein                | -    | -         | -       | -    |
| ZMO1988 | 2049881 | 2048583 | -3 | 1299 NP_767274  | tRNA modification GTPase            | 315  | 1.00E-84  | COG0486 | R    |
| ZMO1989 | 2050073 | 2050573 | 2  | 501 ZP_0005454  | methylated DNA-protein cysteine     | 110  | 1.00E-23  | COG0350 | L    |
| ZMO1990 | 2050607 | 2050717 | 2  | 111             | hypothetical protein                | -    | -         | -       | -    |
| ZMO1991 | 2050668 | 2050552 | -1 | 117             | hypothetical protein                | -    | -         | -       | -    |
| ZMO1992 | 2050677 | 2051378 | 3  | 702 ZP_0009643  | dienelactone hydrolase              | 201  | 9.00E-51  | COG0412 | Q    |
| ZMO1993 | 2051375 | 2052376 | 2  | 1002 ZP_0005454 | NADPH:quinone reductase/Zn-d        | 261  | 1.00E-68  | COG0604 | CR   |

|         |         |         |    |      |                                                |     |           |         |   |
|---------|---------|---------|----|------|------------------------------------------------|-----|-----------|---------|---|
| ZMO1994 | 2052414 | 2052518 | 3  | 105  | hypothetical protein                           |     |           |         |   |
| ZMO1995 | 2052537 | 2052653 | 3  | 117  | hypothetical protein                           |     |           |         |   |
| ZMO1996 | 2053922 | 2052672 | -3 | 1251 | ZP_0005454: transcription termination factor R | 668 | 0         | COG1158 | K |
| ZMO1997 | 2054548 | 2054111 | -2 | 438  | ZP_0009692: membrane protein, predicted        | 168 | 2.00E-41  | COG1981 | S |
| ZMO1998 | 2055611 | 2054664 | -3 | 948  | ZP_0009692: uroporphyrinogen decarboxylase     | 421 | 1.00E-116 | COG0407 | H |
