# Supplementary material for: The genome sequence of the ethanologenic bacterium Zymomonas mobilis ZM4
Source: PubMed Central journal article supplement — Nat Biotechnol. 2005 Jan 1;23(1):63–8. doi: 10.1038/nbt1045 (PMC6870993; doi:10.1038/nbt1045), 2005-01-01
Supplement: 41587_2005_BFnbt1045_MOESM2_ESM.pdf [file 41587_2005_BFnbt1045_MOESM2_ESM.pdf]

**Supplementary Table 2 Distribution of ORFs with closest similarity**

|                                  |           | A.c       | B.j       | B         | B.f       | C.c       | C.v       | E.c       | M.m       | M.l        | N.a       | P         | R         | R.s       | R.p       | R.r       | S.l       | V         | X         | X.f        | etc |
|----------------------------------|-----------|-----------|-----------|-----------|-----------|-----------|-----------|-----------|-----------|------------|-----------|-----------|-----------|-----------|-----------|-----------|-----------|-----------|-----------|------------|-----|
| Information storage & processing | J (141)   | 0         | 4         | 3         | 0         | 3         | 1         | 0         | 0         | 1          | 120       | 0         | 0         | 1         | 2         | 4         | 1         | 0         | 0         | 0          | 1   |
|                                  |           | 0%        | 3%        | 2%        | 0%        | 2%        | 1%        | 0%        | 0%        | 1%         | 85%       | 0%        | 0%        | 1%        | 1%        | 3%        | 1%        | 0%        | 0%        | 0%         | 1%  |
|                                  | K (85)    | 3         | 4         | 3         | 3         | 2         | 1         | 0         | 3         | 4          | 43        | 1         | 0         | 5         | 2         | 3         | 0         | 1         | 1         | 0          | 4   |
|                                  |           | 4%        | 5%        | 4%        | 4%        | 2%        | 1%        | 0%        | 4%        | 5%         | 51%       | 1%        | 0%        | 6%        | 2%        | 4%        | 0%        | 1%        | 1%        | 0%         | 5%  |
|                                  | L (87)    | 3         | 1         | 3         | 0         | 3         | 1         | 0         | 4         | 1          | 51        | 4         | 1         | 3         | 1         | 2         | 2         | 0         | 2         | 0          | 5   |
|                                  | 3%        | 1%        | 3%        | 0%        | 3%        | 1%        | 0%        | 5%        | 1%        | 59%        | 5%        | 1%        | 3%        | 1%        | 2%        | 2%        | 0%        | 2%        | 0%        | 6%         |     |
| sum                              | <b>6</b>  | <b>9</b>  | <b>9</b>  | <b>3</b>  | <b>8</b>  | <b>3</b>  | <b>0</b>  | <b>7</b>  | <b>6</b>  | <b>214</b> | <b>5</b>  | <b>1</b>  | <b>9</b>  | <b>5</b>  | <b>9</b>  | <b>3</b>  | <b>1</b>  | <b>3</b>  | <b>0</b>  | <b>10</b>  |     |
|                                  | <b>2%</b> | <b>3%</b> | <b>3%</b> | <b>1%</b> | <b>3%</b> | <b>1%</b> | <b>0%</b> | <b>2%</b> | <b>2%</b> | <b>68%</b> | <b>2%</b> | <b>0%</b> | <b>3%</b> | <b>2%</b> | <b>3%</b> | <b>1%</b> | <b>0%</b> | <b>1%</b> | <b>0%</b> | <b>3%</b>  |     |
| Cellular processes               | D (20)    | 0         | 0         | 1         | 0         | 0         | 0         | 1         | 0         | 15         | 1         | 1         | 1         | 0         | 0         | 0         | 0         | 0         | 0         | 0          |     |
|                                  |           | 0%        | 0%        | 5%        | 0%        | 0%        | 0%        | 5%        | 0%        | 75%        | 5%        | 5%        | 5%        | 0%        | 0%        | 0%        | 0%        | 0%        | 0%        | 0%         |     |
|                                  | V (25)    | 0         | 1         | 0         | 4         | 1         | 0         | 1         | 0         | 1          | 5         | 1         | 0         | 0         | 1         | 1         | 0         | 1         | 0         | 0          | 6   |
|                                  |           | 0%        | 4%        | 0%        | 16%       | 4%        | 0%        | 4%        | 0%        | 4%         | 20%       | 4%        | 0%        | 0%        | 4%        | 4%        | 0%        | 4%        | 0%        | 0%         | 24% |
|                                  | T (60)    | 2         | 1         | 0         | 1         | 9         | 0         | 0         | 2         | 0          | 27        | 4         | 0         | 3         | 0         | 2         | 2         | 1         | 1         | 0          | 3   |
|                                  |           | 3%        | 2%        | 0%        | 2%        | 15%       | 0%        | 0%        | 3%        | 0%         | 45%       | 7%        | 0%        | 5%        | 0%        | 3%        | 3%        | 2%        | 2%        | 0%         | 5%  |
|                                  | M (120)   | 2         | 1         | 0         | 12        | 2         | 3         | 2         | 9         | 1          | 53        | 6         | 6         | 1         | 3         | 0         | 1         | 0         | 1         | 0          | 11  |
|                                  |           | 2%        | 1%        | 0%        | 10%       | 2%        | 3%        | 2%        | 8%        | 1%         | 44%       | 5%        | 5%        | 1%        | 3%        | 0%        | 1%        | 0%        | 1%        | 0%         | 9%  |
|                                  | N (40)    | 2         | 0         | 0         | 3         | 6         | 1         | 0         | 0         | 0          | 2         | 2         | 2         | 8         | 1         | 0         | 2         | 4         | 2         | 0          | 3   |
|                                  |           | 5%        | 0%        | 0%        | 8%        | 15%       | 3%        | 0%        | 0%        | 0%         | 5%        | 5%        | 5%        | 20%       | 3%        | 0%        | 5%        | 10%       | 5%        | 0%         | 8%  |
| U (47)                           | 0         | 0         | 1         | 1         | 0         | 2         | 0         | 0         | 0         | 23         | 2         | 5         | 3         | 0         | 0         | 1         | 3         | 0         | 0         | 5          |     |
|                                  | 0%        | 0%        | 2%        | 2%        | 0%        | 4%        | 0%        | 0%        | 0%        | 49%        | 4%        | 11%       | 6%        | 0%        | 0%        | 2%        | 6%        | 0%        | 0%        | 11%        |     |
| O (81)                           | 0         | 2         | 1         | 1         | 2         | 0         | 1         | 3         | 0         | 48         | 1         | 2         | 1         | 2         | 3         | 0         | 0         | 2         | 1         | 8          |     |
|                                  | 0%        | 2%        | 1%        | 1%        | 2%        | 0%        | 1%        | 4%        | 0%        | 59%        | 1%        | 2%        | 1%        | 2%        | 4%        | 0%        | 0%        | 2%        | 1%        | 10%        |     |
| sum                              | <b>6</b>  | <b>5</b>  | <b>3</b>  | <b>22</b> | <b>20</b> | <b>6</b>  | <b>4</b>  | <b>15</b> | <b>2</b>  | <b>173</b> | <b>17</b> | <b>16</b> | <b>17</b> | <b>7</b>  | <b>6</b>  | <b>6</b>  | <b>9</b>  | <b>6</b>  | <b>1</b>  | <b>36</b>  |     |
|                                  | <b>2%</b> | <b>1%</b> | <b>1%</b> | <b>6%</b> | <b>5%</b> | <b>2%</b> | <b>1%</b> | <b>4%</b> | <b>1%</b> | <b>44%</b> | <b>4%</b> | <b>4%</b> | <b>4%</b> | <b>2%</b> | <b>2%</b> | <b>2%</b> | <b>2%</b> | <b>2%</b> | <b>0%</b> | <b>9%</b>  |     |
| Metabolism                       | C (85)    | 3         | 1         | 0         | 7         | 3         | 0         | 1         | 9         | 3          | 27        | 5         | 2         | 2         | 1         | 1         | 0         | 0         | 2         | 2          | 9   |
|                                  |           | 4%        | 1%        | 0%        | 8%        | 4%        | 0%        | 1%        | 11%       | 4%         | 32%       | 6%        | 2%        | 2%        | 1%        | 1%        | 0%        | 0%        | 2%        | 2%         | 11% |
|                                  | G (76)    | 1         | 1         | 2         | 6         | 4         | 1         | 1         | 2         | 3          | 24        | 3         | 1         | 1         | 2         | 4         | 1         | 0         | 3         | 1          | 10  |
|                                  |           | 1%        | 1%        | 3%        | 8%        | 5%        | 1%        | 1%        | 3%        | 4%         | 32%       | 4%        | 1%        | 1%        | 3%        | 5%        | 1%        | 0%        | 4%        | 1%         | 13% |
|                                  | E (171)   | 2         | 5         | 2         | 8         | 12        | 1         | 1         | 9         | 2          | 83        | 6         | 0         | 3         | 4         | 1         | 2         | 0         | 4         | 1          | 19  |
|                                  |           | 1%        | 3%        | 1%        | 5%        | 7%        | 1%        | 1%        | 5%        | 1%         | 49%       | 4%        | 0%        | 2%        | 2%        | 1%        | 1%        | 0%        | 2%        | 1%         | 11% |
|                                  | F (54)    | 1         | 1         | 2         | 0         | 4         | 0         | 0         | 3         | 1          | 32        | 0         | 0         | 1         | 0         | 3         | 2         | 0         | 0         | 0          | 2   |
|                                  |           | 2%        | 2%        | 4%        | 0%        | 7%        | 0%        | 0%        | 6%        | 2%         | 59%       | 0%        | 0%        | 2%        | 0%        | 6%        | 4%        | 0%        | 0%        | 0%         | 4%  |
|                                  | H (96)    | 1         | 3         | 3         | 0         | 4         | 0         | 0         | 8         | 1          | 51        | 0         | 0         | 1         | 5         | 2         | 1         | 0         | 2         | 0          | 9   |
|                                  |           | 1%        | 3%        | 3%        | 0%        | 4%        | 0%        | 0%        | 8%        | 1%         | 53%       | 0%        | 0%        | 1%        | 5%        | 2%        | 1%        | 0%        | 2%        | 0%         | 9%  |
| I (53)                           | 0         | 2         | 0         | 3         | 2         | 0         | 0         | 6         | 3         | 21         | 1         | 1         | 0         | 1         | 2         | 0         | 1         | 4         | 0         | 5          |     |
|                                  | 0%        | 4%        | 0%        | 6%        | 4%        | 0%        | 0%        | 11%       | 6%        | 40%        | 2%        | 2%        | 0%        | 2%        | 4%        | 0%        | 2%        | 8%        | 0%        | 9%         |     |
| P (93)                           | 1         | 1         | 1         | 9         | 2         | 5         | 3         | 1         | 3         | 17         | 7         | 3         | 1         | 2         | 6         | 0         | 1         | 2         | 2         | 19         |     |
|                                  | 1%        | 1%        | 1%        | 10%       | 2%        | 5%        | 3%        | 1%        | 3%        | 18%        | 8%        | 3%        | 1%        | 2%        | 6%        | 0%        | 1%        | 2%        | 2%        | 20%        |     |
| Q (32)                           | 0         | 1         | 0         | 0         | 3         | 0         | 1         | 1         | 3         | 10         | 1         | 1         | 0         | 0         | 3         | 0         | 1         | 2         | 0         | 3          |     |
|                                  | 0%        | 3%        | 0%        | 0%        | 9%        | 0%        | 3%        | 3%        | 9%        | 31%        | 3%        | 3%        | 0%        | 0%        | 9%        | 0%        | 3%        | 6%        | 0%        | 9%         |     |
| sum                              | <b>9</b>  | <b>15</b> | <b>10</b> | <b>33</b> | <b>34</b> | <b>7</b>  | <b>7</b>  | <b>39</b> | <b>19</b> | <b>265</b> | <b>23</b> | <b>8</b>  | <b>9</b>  | <b>15</b> | <b>22</b> | <b>6</b>  | <b>3</b>  | <b>19</b> | <b>6</b>  | <b>76</b>  |     |
|                                  | <b>1%</b> | <b>2%</b> | <b>2%</b> | <b>5%</b> | <b>5%</b> | <b>1%</b> | <b>1%</b> | <b>6%</b> | <b>3%</b> | <b>40%</b> | <b>3%</b> | <b>1%</b> | <b>1%</b> | <b>2%</b> | <b>3%</b> | <b>1%</b> | <b>0%</b> | <b>3%</b> | <b>1%</b> | <b>12%</b> |     |
| Poorly characterized             | R (198)   | 6         | 4         | 2         | 6         | 8         | 2         | 3         | 9         | 4          | 70        | 6         | 4         | 4         | 3         | 9         | 0         | 2         | 9         | 0          | 37  |
|                                  |           | 3%        | 2%        | 1%        | 3%        | 4%        | 1%        | 2%        | 5%        | 2%         | 35%       | 3%        | 2%        | 2%        | 2%        | 5%        | 0%        | 1%        | 5%        | 0%         | 19% |
|                                  | S (104)   | 1         | 1         | 5         | 2         | 6         | 1         | 0         | 4         | 3          | 46        | 6         | 2         | 2         | 3         | 3         | 3         | 0         | 3         | 0          | 6   |
|                                  | 1%        | 1%        | 5%        | 2%        | 6%        | 1%        | 0%        | 4%        | 3%        | 44%        | 6%        | 2%        | 2%        | 3%        | 3%        | 3%        | 0%        | 3%        | 0%        | 6%         |     |
| sum                              | <b>7</b>  | <b>5</b>  | <b>7</b>  | <b>8</b>  | <b>14</b> | <b>3</b>  | <b>3</b>  | <b>13</b> | <b>7</b>  | <b>116</b> | <b>12</b> | <b>6</b>  | <b>6</b>  | <b>6</b>  | <b>12</b> | <b>3</b>  | <b>2</b>  | <b>12</b> | <b>0</b>  | <b>43</b>  |     |
|                                  | <b>2%</b> | <b>2%</b> | <b>2%</b> | <b>3%</b> | <b>5%</b> | <b>1%</b> | <b>1%</b> | <b>4%</b> | <b>2%</b> | <b>38%</b> | <b>4%</b> | <b>2%</b> | <b>2%</b> | <b>2%</b> | <b>4%</b> | <b>1%</b> | <b>1%</b> | <b>4%</b> | <b>0%</b> | <b>14%</b> |     |
| <b>Total</b>                     | <b>28</b> | <b>34</b> | <b>29</b> | <b>66</b> | <b>76</b> | <b>19</b> | <b>14</b> | <b>74</b> | <b>34</b> | <b>768</b> | <b>57</b> | <b>31</b> | <b>41</b> | <b>33</b> | <b>49</b> | <b>18</b> | <b>15</b> | <b>40</b> | <b>7</b>  | <b>165</b> |     |
|                                  | <b>2%</b> | <b>2%</b> | <b>2%</b> | <b>4%</b> | <b>5%</b> | <b>1%</b> | <b>1%</b> | <b>4%</b> | <b>2%</b> | <b>46%</b> | <b>3%</b> | <b>2%</b> | <b>2%</b> | <b>2%</b> | <b>3%</b> | <b>1%</b> | <b>1%</b> | <b>2%</b> | <b>0%</b> | <b>10%</b> |     |

A.c, *Agrobacterium tumefaciens*; B.j, *Bradyrhizobium japonicum*; B, *Brucella* sp.; B.f, *Burkholderia fungorum*; C.c, *Caulobacter crescentus*; C.v, *Chromobacterium violaceum*; E.c, *Escherichia coli*; M.m, *Magnetospirillum magnetotacticum*; M.l, *Mesorhizobium loti*; N.a, *Novosphingobium aromaticivorans*; P, *Pseudomonas* sp.; R, *Ralstonia* sp.; R.s, *Rhodobacter sphaeroides*; R.p, *Rhodopseudomonas palustris*; R.r, *Rhodospirillum rubrum*; S.l, *Sinorhizobium meliloti*; V, *Vibrio* sp.; X, *Xanthomonas* sp.; X.f, *Xylella fastidiosa*
