# Supplementary material for: The genome sequence of the ethanologenic bacterium Zymomonas mobilis ZM4
Source: PubMed Central journal article supplement — Nat Biotechnol. 2005 Jan 1;23(1):63–8. doi: 10.1038/nbt1045 (PMC6870993; doi:10.1038/nbt1045), 2005-01-01
Supplement: 41587_2005_BFnbt1045_MOESM3_ESM.pdf [file 41587_2005_BFnbt1045_MOESM3_ESM.pdf]

| ORF     | Name                                                                       | Fold    |
|---------|----------------------------------------------------------------------------|---------|
| ZMO1947 | translational inhibitor protein                                            | 1441.68 |
| ZMO1944 | transcriptional regulatory protein                                         | 1184.91 |
| ZMO1949 | NAD(P)H quinone oxidoreductase, putative                                   | 1162.87 |
| ZMO1942 | type IV secretory pathway, VirD2 components (relaxase)                     | 937.31  |
| ZMO1934 | type I restriction-modification enzyme, M subunit                          | 690.59  |
| ZMO1948 | conserved hypothetical protein                                             | 448.83  |
| ZMO1939 | ATPases involved in chromosome partitioning                                | 300.45  |
| ZMO1931 | conserved hypothetical protein                                             | 286.93  |
| ZMO1937 | conserved hypothetical protein                                             | 225.72  |
| ZMO1946 | oxidoreductase (short-chain alcohol dehydrogenases)                        | 218.82  |
| ZMO1941 | type IV secretory pathway, conjugal transfer TraF transmembrane protein    | 200.54  |
| ZMO1940 | conserved hypothetical protein                                             | 188.12  |
| ZMO1943 | type IV secretory pathway, VirD2 components (relaxase)                     | 169.62  |
| ZMO1861 | dioxygenases related to 2-nitropropane dioxygenase                         | 155.61  |
| ZMO0242 | ATP synthase, epsilon subunit                                              | 144.31  |
| ZMO1945 | predicted epimerase, PhzC/PhzF homolog                                     | 123.85  |
| ZMO0652 | flagellar protein FliS, probable                                           | 115.92  |
| ZMO1932 | No hit                                                                     | 107.05  |
| ZMO0732 | DNA-directed RNA polymerase, beta' subunit/160 kD subunit                  | 77.00   |
| ZMO1300 | capsular polysaccharide biosynthesis protein, bcbE                         | 72.27   |
| ZMO1950 | aspartate/tyrosine/aromatic aminotransferase                               | 46.47   |
| ZMO1936 | conserved hypothetical protein                                             | 40.87   |
| ZMO0611 | flagellar biosynthesis, hook protein                                       | 35.78   |
| ZMO1863 | putative phosphatase                                                       | 23.32   |
| ZMO1930 | phage-related integrase                                                    | 22.20   |
| ZMO0171 | TonB-dependent receptor                                                    | 21.55   |
| ZMO1194 | nucleotide-binding protein involved in DNA uptake, DNA processing chain A  | 21.34   |
| ZMO1933 | type I restriction-modification enzyme, S subunit                          | 20.29   |
| ZMO1826 | nitrogenase reductase iron-molibdenum cofactor synthesis protein, NifE     | 15.77   |
| ZMO0964 | outer membrane multidrug resistance lipoprotein, probable                  | 15.42   |
| ZMO1758 | DNA uptake lipoprotein                                                     | 14.46   |
| ZMO1261 | ABC-type nitrate/sulfonate/bicarbonate transport systems, periplasmic comp | 13.11   |
| ZMO1860 | similar to nodulin 21                                                      | 13.10   |
| ZMO1462 | hypothetical protein                                                       | 13.03   |
| ZMO0051 | No hit                                                                     | 12.45   |
| ZMO1095 | pyrophosphatase, predicted                                                 | 11.75   |
| ZMO0878 | protein-glutamate methyltransferase (EC 3.1.1.61) cheB                     | 10.91   |
| ZMO0091 | No hit                                                                     | 10.59   |
| ZMO1951 | demethylmenaquinone methyltransferase                                      | 10.32   |
| ZMO1953 | No hit                                                                     | 9.95    |
| ZMO1952 | 3-methyl-2-oxobutanoate hydroxymethyltransferase; PanB, probable           | 9.70    |
| ZMO0424 | ABC transporter, ATP-binding protein                                       | 9.49    |
| ZMO0909 | glycosyltransferase                                                        | 9.42    |
| ZMO1468 | No hit                                                                     | 9.07    |
| ZMO1856 | transport protein, putative                                                | 8.12    |
| ZMO1721 | lactoylglutathione lyase and related lyases                                | 7.97    |
| ZMO0692 | type IIA topoisomerase (DNA gyrase/topo II, topoisomerase IV), A subunit   | 7.90    |
| ZMO0916 | No hit                                                                     | 7.72    |
| ZMO0050 | transcriptional regulator, LysR family                                     | 7.66    |

|         |                                                                                      |      |
|---------|--------------------------------------------------------------------------------------|------|
| ZMO1097 | thiol-disulfide isomerase and thioredoxins                                           | 7.27 |
| ZMO1600 | homoserine kinase type II                                                            | 7.02 |
| ZMO1287 | LPS glycosyltransferase; Lpg                                                         | 6.94 |
| ZMO0619 | flagellar FlgA, polar                                                                | 6.76 |
| ZMO0727 | ribosomal protein L10                                                                | 6.73 |
| ZMO0677 | 3-isopropylmalate dehydrogenase (beta-IPM dehydrogenase) (IMDH)                      | 6.72 |
| ZMO0052 | cyanate permease (MFS)                                                               | 6.71 |
| ZMO0329 | archaeal fructose-1,6-bisphosphatase and related enzymes of inositol monophosphatase | 6.37 |
| ZMO0997 | 2-dehydro-3-deoxy-phosphogluconate aldolase (EC 4.1.2.14) -                          | 6.23 |
| ZMO1518 | archaeal fructose-1,6-bisphosphatase/inositol monophosphatase                        | 6.18 |
| ZMO1034 | hypothetical protein                                                                 | 6.12 |
| ZMO0275 | ABC-type (unclassified) transport system, ATPase component                           | 6.05 |
| ZMO0049 | No hit                                                                               | 5.82 |
| ZMO0784 | glutamyl-tRNA(gln) amidotransferase subunit C                                        | 5.71 |
| ZMO0548 | two-component signal transduction histidine kinase                                   | 5.68 |
| ZMO0469 | No hit                                                                               | 5.66 |
| ZMO1406 | hydrolases or acyltransferases                                                       | 5.56 |
| ZMO0889 | aldose 1-epimerase precursor (Mutarotase)                                            | 5.56 |
| ZMO1476 | No hit                                                                               | 5.51 |
| ZMO0883 | ribosomal protein S9                                                                 | 5.40 |
| ZMO0486 | conserved hypothetical protein                                                       | 5.37 |
| ZMO0965 | aromatic efflux pump membrane protein, putative                                      | 5.37 |
| ZMO0598 | integrase/recombinase XerD                                                           | 5.36 |
| ZMO0367 | glucose-6-phosphate 1-dehydrogenase (G6PD)                                           | 5.28 |
| ZMO0305 | hypothetical protein                                                                 | 5.25 |
| ZMO1461 | conserved hypothetical protein                                                       | 5.23 |
| ZMO1701 | outer membrane lipoprotein-sorting protein                                           | 5.22 |
| ZMO1479 | electron transfer flavoprotein alpha-subunit, (ETFLS)                                | 5.13 |
| ZMO1033 | cyclopropane fatty acid synthase and related methyltransferases                      | 5.07 |
| ZMO1705 | thioredoxin                                                                          | 5.05 |
| ZMO1859 | regulator of pathogenicity factors, carbohydrate-selective porin                     | 5.01 |
| ZMO1480 | electron transfer flavoprotein beta-subunit                                          | 4.93 |
| ZMO0350 | conserved hypothetical protein                                                       | 4.92 |
| ZMO0571 | ABC-type anion transport system, duplicated permease                                 | 4.90 |
| ZMO1342 | No hit                                                                               | 4.89 |
| ZMO0989 | heat shock protein, molecular chaperone                                              | 4.86 |
| ZMO0124 | ATPase, predicted                                                                    | 4.78 |
| ZMO0045 | No hit                                                                               | 4.69 |
| ZMO0312 | N-acyl-L-amino acid amidohydrolase                                                   | 4.62 |
| ZMO1105 | two-component sensor signal transduction histidine kinase                            | 4.59 |
| ZMO0289 | No hit                                                                               | 4.59 |
| ZMO0837 | cell division protein FtsZ                                                           | 4.54 |
| ZMO0533 | ribosomal protein S5                                                                 | 4.53 |
| ZMO0715 | aspartyl-tRNA synthetase                                                             | 4.50 |
| ZMO0180 | enzyme involved in the deoxyxylulose pathway of isoprenoid biosynthesis              | 4.48 |
| ZMO1490 | outer membrane protein, putative                                                     | 4.48 |
| ZMO0561 | outer membrane receptor proteins, mostly Fe transport, TonB-dependent receptor       | 4.46 |
| ZMO1954 | type IV secretory pathway, VirB10, conjugal transfer TrbL transmembrane protein      | 4.43 |
| ZMO0524 | ribosomal protein L29                                                                | 4.42 |
| ZMO1083 | glycosyltransferases involved in cell wall biogenesis, cellulose synthase 1          | 4.37 |

|         |                                                                               |      |
|---------|-------------------------------------------------------------------------------|------|
| ZMO1857 | transcriptional regulator, probable                                           | 4.32 |
| ZMO0792 | dihydroorotase and related cyclic amidohydrolases                             | 4.31 |
| ZMO0272 | No hit                                                                        | 4.20 |
| ZMO1263 | ABC-type nitrate/sulfonate/bicarbonate transport system, ATPase componer      | 4.18 |
| ZMO0280 | No hit                                                                        | 4.18 |
| ZMO0913 | branched-chain amino acid aminotransferase                                    | 4.13 |
| ZMO1324 | Serine kinase of the HPr protein, regulates carbohydrate metabolism           | 4.03 |
| ZMO1706 | No hit                                                                        | 4.01 |
| ZMO0684 | conserved hypothetical protein                                                | 4.00 |
| ZMO0165 | periplasmic component of the Tol biopolymer transport system                  | 3.96 |
| ZMO0685 | conserved hypothetical protein                                                | 3.96 |
| ZMO0225 | homoserine acetyltransferase                                                  | 3.89 |
| ZMO1498 | diadenosine tetraphosphate (Ap4A) hydrolase and other HIT                     | 3.87 |
| ZMO1405 | two component response regulator                                              | 3.86 |
| ZMO0286 | outer membrane protein                                                        | 3.85 |
| ZMO1333 | No hit                                                                        | 3.83 |
| ZMO1556 | gamma-glutamylcysteine synthetase                                             | 3.82 |
| ZMO0217 | No hit                                                                        | 3.79 |
| ZMO1335 | flavodoxin WrbA, multimeric                                                   | 3.79 |
| ZMO0299 | phosphoribosylamine--glycine ligase (GARS) (glycinamide ribonucleotide synth  | 3.72 |
| ZMO1220 | Sec-independent protein secretion pathway component TatA/E                    | 3.72 |
| ZMO0638 | No hit                                                                        | 3.69 |
| ZMO1955 | malic enzyme, NAD-dependent                                                   | 3.62 |
| ZMO1299 | capsular polysaccharide biosynthesis protein, bcbG                            | 3.60 |
| ZMO0721 | small protein B                                                               | 3.59 |
| ZMO1392 | hypothetical protein                                                          | 3.58 |
| ZMO0156 | No hit                                                                        | 3.52 |
| ZMO1978 | chromosome partitioning protein, ParB                                         | 3.46 |
| ZMO1158 | aspartate racemase                                                            | 3.45 |
| ZMO1473 | hypothetical protein                                                          | 3.40 |
| ZMO0341 | oxidoreductase, short chain dehydrogenase/reductase family                    | 3.39 |
| ZMO1286 | sorbitol dehydrogenase small subunit                                          | 3.38 |
| ZMO0719 | transglycosylase and related regulatory proteins                              | 3.38 |
| ZMO1466 | oxidoreductase                                                                | 3.35 |
| ZMO0325 | hypothetical protein                                                          | 3.33 |
| ZMO1573 | predicted iron-dependent peroxidase                                           | 3.32 |
| ZMO1003 | hydroxymethylpyrimidine/phosphomethylpyrimidine kinase                        | 3.30 |
| ZMO0119 | Na <sup>+</sup> /H <sup>+</sup> antiporter                                    | 3.29 |
| ZMO0043 | nucleotide-binding protein implicated in inhibition of septum formation       | 3.28 |
| ZMO0748 | cysteine synthase                                                             | 3.28 |
| ZMO0764 | hydrolases or acyltransferases, predicted                                     | 3.23 |
| ZMO1924 | collagenase and related proteases                                             | 3.22 |
| ZMO1968 | No hit                                                                        | 3.15 |
| ZMO1237 | D-lactate dehydrogenase                                                       | 3.09 |
| ZMO0777 | metallo-beta-lactamase family protein                                         | 3.09 |
| ZMO0663 | DNA repair proteins, RadC                                                     | 3.09 |
| ZMO0409 | ornithine carbamoyltransferase                                                | 3.09 |
| ZMO0073 | hemolysins and related proteins containing CBS domains                        | 3.08 |
| ZMO1013 | nucleotide-binding protein implicated in inhibition of septum formation (maf) | 3.05 |
| ZMO0520 | ribosomal protein L2                                                          | 3.03 |

|         |                                                                                 |      |
|---------|---------------------------------------------------------------------------------|------|
| ZMO0695 | conserved hypothetical protein                                                  | 3.02 |
| ZMO1217 | No hit                                                                          | 3.01 |
| ZMO1650 | beta-lactamase class C, esterase                                                | 3.01 |
| ZMO1004 | ribonuclease HII                                                                | 2.99 |
| ZMO1762 | endonuclease distantly related to archaeal Holliday junction resolvase, predict | 2.98 |
| ZMO1315 | hypothetical protein                                                            | 2.97 |
| ZMO1986 | outer membrane receptor proteins, mostly Fe transport, TonB-dependent           | 2.96 |
| ZMO1338 | efflux protein, LysE family                                                     | 2.96 |
| ZMO1347 | threonine aldolase                                                              | 2.94 |
| ZMO0247 | heat shock protein, ATP-dependent protease HslVU (ClpYQ), ATPase subunit        | 2.94 |
| ZMO0449 | conserved hypothetical protein                                                  | 2.93 |
| ZMO1088 | rare lipoprotein A, putative                                                    | 2.91 |
| ZMO0104 | No hit                                                                          | 2.91 |
| ZMO1394 | permeases, predicted                                                            | 2.90 |
| ZMO0090 | dehydrogenases with different specificities (related to short-chain alcohol def | 2.90 |
| ZMO1006 | dihydropteroate synthase and related enzymes                                    | 2.89 |
| ZMO1667 | periplasmic protease                                                            | 2.87 |
| ZMO0757 | conserved hypothetical protein                                                  | 2.87 |
| ZMO0109 | No hit                                                                          | 2.87 |
| ZMO0769 | tRNA (5-methylaminomethyl-2-thiouridylate)-methyltransferase                    | 2.87 |
| ZMO1202 | transcriptional regulator, predicted                                            | 2.87 |
| ZMO1442 | hypothetical protein                                                            | 2.86 |
| ZMO0694 | No hit                                                                          | 2.85 |
| ZMO0714 | ribonuclease D                                                                  | 2.84 |
| ZMO1921 | Primosomal protein N' (replication factor Y) - superfamily II helicase          | 2.83 |
| ZMO1717 | conserved hypothetical protein                                                  | 2.83 |
| ZMO1534 | No hit                                                                          | 2.82 |
| ZMO1458 | No hit                                                                          | 2.81 |
| ZMO0682 | conserved hypothetical protein                                                  | 2.81 |
| ZMO1463 | TonB-dependent receptor, probable                                               | 2.81 |
| ZMO0514 | ribosomal protein S7                                                            | 2.81 |
| ZMO1111 | ABC transporter (permease)                                                      | 2.80 |
| ZMO0046 | No hit                                                                          | 2.79 |
| ZMO1374 | hypothetical protein                                                            | 2.78 |
| ZMO0791 | aspartate carbamoyltransferase, catalytic chain                                 | 2.76 |
| ZMO1459 | transporter, putative                                                           | 2.76 |
| ZMO0498 | N-acetylglucosamine-1-phosphate uridyltransferase                               | 2.75 |
| ZMO0048 | No hit                                                                          | 2.75 |
| ZMO0976 | oxidoreductase, putative                                                        | 2.74 |
| ZMO0923 | N-acetylglutamate synthase (N-acetylornithine aminotransferase)                 | 2.73 |
| ZMO1918 | adenosylmethionine-8-amino-7-oxononanoate aminotransferase                      | 2.72 |
| ZMO1134 | No hit                                                                          | 2.71 |
| ZMO1890 | Zn-dependent peptidases, predicted                                              | 2.68 |
| ZMO0720 | dihydrodipicolinate synthase/N-acetylneuraminase lyase                          | 2.67 |
| ZMO1303 | pyrroline-5-carboxylate reductase                                               | 2.67 |
| ZMO1260 | TonB-dependent receptor, outer membrane receptor proteins, mostly Fe tran       | 2.66 |
| ZMO0803 | FOG: TPR repeat                                                                 | 2.66 |
| ZMO1690 | heat shock protein, DnaJ-class molecular chaperone                              | 2.66 |
| ZMO0236 | ATPases involved in chromosome partitioning                                     | 2.66 |
| ZMO1935 | conserved hypothetical protein                                                  | 2.65 |

|         |                                                                            |      |
|---------|----------------------------------------------------------------------------|------|
| ZMO0824 | No hit                                                                     | 2.65 |
| ZMO0020 | hypothetical protein                                                       | 2.64 |
| ZMO1099 | helicase, inactivated superfamily I                                        | 2.63 |
| ZMO0749 | RNA polymerase sigma-32 factor                                             | 2.63 |
| ZMO0287 | transport transmembrane protein, putative                                  | 2.60 |
| ZMO0131 | conserved hypothetical protein                                             | 2.60 |
| ZMO0488 | GTP binding protein, probable                                              | 2.59 |
| ZMO0691 | NAD(FAD)-utilizing enzyme possibly involved in translation                 | 2.57 |
| ZMO1725 | conserved hypothetical protein                                             | 2.57 |
| ZMO0197 | membrane carboxypeptidase/penicillin-binding protein                       | 2.57 |
| ZMO1138 | tRNA delta(2)-isopentenylpyrophosphate transferase (IPP transferase)       | 2.54 |
| ZMO1574 | transcriptional regulatory protein                                         | 2.53 |
| ZMO1876 | hypothetical protein                                                       | 2.53 |
| ZMO1615 | transcription elongation factor greA                                       | 2.52 |
| ZMO0123 | No hit                                                                     | 2.51 |
| ZMO0256 | FAD/FMN-containing dehydrogenases (lactate dehydrogenase)                  | 2.48 |
| ZMO0912 | hypothetical protein                                                       | 2.48 |
| ZMO0420 | protein tyrC [includes: Cyclohexadienyl dehydrogenase (Arogenate dehydroge | 2.47 |
| ZMO1250 | No hit                                                                     | 2.47 |
| ZMO1417 | DNA and RNA helicases superfamily II                                       | 2.46 |
| ZMO1164 | phosphate regulon response regulator PhoB                                  | 2.45 |
| ZMO1922 | capsule polysaccharide export protein                                      | 2.44 |
| ZMO1258 | ABC-type transport system involved in cytochrome c, heme exporter          | 2.41 |
| ZMO0047 | conserved hypothetical protein, transporter                                | 2.40 |
| ZMO0549 | polyribonucleotide nucleotidyltransferase (polynucleotide phosphorylase)   | 2.40 |
| ZMO1912 | GTPase, probable translation factor                                        | 2.39 |
| ZMO0079 | chemotaxis protein CheYI                                                   | 2.38 |
| ZMO1052 | phosphoribosylaminoimidazole-succinocarboxamide synthase                   | 2.37 |
| ZMO0128 | TonB-dependent receptor, probable                                          | 2.36 |
| ZMO1679 | Rossmann fold nucleotide-binding protein, predicted                        | 2.35 |
| ZMO1133 | carbonic anhydrase                                                         | 2.35 |
| ZMO0926 | ABC transporter, substrate-binding protein, putative                       | 2.34 |
| ZMO1770 | argininosuccinate lyase (arginosuccinase) (ASAL)                           | 2.33 |
| ZMO1928 | heat shock protein groEs, 10 kDa chaperonin, HSP10                         | 2.31 |
| ZMO0583 | acetyl-CoA carboxylase beta subunit                                        | 2.28 |
| ZMO0463 | No hit                                                                     | 2.27 |
| ZMO0801 | membrane-fusion protein                                                    | 2.27 |
| ZMO0779 | membrane-fusion protein                                                    | 2.27 |
| ZMO0859 | NifS protein homolog (spl1)                                                | 2.26 |
| ZMO1432 | hypothetical membrane protein                                              | 2.26 |
| ZMO0269 | No hit                                                                     | 2.25 |
| ZMO1532 | phosphoribosylformylglycinamide (FGAM) synthase, PurL                      | 2.24 |
| ZMO1605 | pyruvate dehydrogenase E1 component, beta subunit                          | 2.24 |
| ZMO0113 | para-aminobenzoate synthase component I                                    | 2.23 |
| ZMO1089 | D-alanyl-D-alanine carboxypeptidase, penicillin binding protein            | 2.22 |

|         |                                                                          |      |
|---------|--------------------------------------------------------------------------|------|
| ZMO0666 | conserved hypothetical protein                                           | 2.22 |
| ZMO0669 | ATP synthase B chain                                                     | 2.21 |
| ZMO0559 | ATPase (AAA+ superfamily), predicted                                     | 2.21 |
| ZMO1182 | 4-diphosphocytidyl-2-C-methyl-D-erythritol kinase (CMK)                  | 2.20 |
| ZMO0982 | permease protein of oligopeptide ABC transporter                         | 2.20 |
| ZMO1113 | NADH dehydrogenase                                                       | 2.19 |
| ZMO1283 | transcriptional regulator, LacI family                                   | 2.19 |
| ZMO0126 | No hit                                                                   | 2.19 |
| ZMO0753 | glutaredoxin 3                                                           | 2.17 |
| ZMO0427 | selenocysteine lyase                                                     | 2.17 |
| ZMO0379 | gene 2 protein, terminase [Enterobacteria phage Sf6]                     | 2.16 |
| ZMO0059 | glycerate kinase                                                         | 2.16 |
| ZMO0148 | No hit                                                                   | 2.15 |
| ZMO0136 | FOG: TPR repeat, SEL1 subfamily                                          | 2.15 |
| ZMO1693 | chorismate synthase                                                      | 2.14 |
| ZMO0776 | phospholipid N-methyltransferase                                         | 2.12 |
| ZMO0182 | S-adenosylhomocysteine hydrolase                                         | 2.12 |
| ZMO1341 | metalloprotease                                                          | 2.12 |
| ZMO0087 | No hit                                                                   | 2.12 |
| ZMO0512 | dihydrolipoyl dehydrogenase (E3 component of pyruvate and 2-oxoglutarate | 2.12 |
| ZMO0105 | 3-isopropylmalate dehydratase large subunit                              | 2.11 |
| ZMO0852 | S-adenosylmethionine:tRNA-ribosyltransferase                             | 2.11 |
| ZMO1435 | leucyl-tRNA synthetase                                                   | 2.11 |
| ZMO0011 | hypothetical protein                                                     | 2.10 |
| ZMO1309 | leucyl aminopeptidase                                                    | 2.10 |
| ZMO1723 | conserved hypothetical protein                                           | 2.09 |
| ZMO1639 | uncharacterized membrane protein, putative virulence factor              | 2.09 |
| ZMO1960 | No hit                                                                   | 2.09 |
| ZMO0127 | nuclease S1                                                              | 2.09 |
| ZMO0279 | cold shock proteins                                                      | 2.08 |
| ZMO0630 | No hit                                                                   | 2.07 |
| ZMO0778 | cation/multidrug efflux pump                                             | 2.06 |
| ZMO0146 | No hit                                                                   | 2.06 |
| ZMO0846 | glutathione-regulated potassium-efflux system protein kefB               | 2.05 |
| ZMO0918 | catalase                                                                 | 2.05 |
| ZMO0718 | transcription elongation factor                                          | 2.05 |
| ZMO1169 | hypothetical protein                                                     | 2.04 |
| ZMO1845 | alkylphosphonate uptake protein                                          | 2.03 |
| ZMO0134 | FOG: TPR repeat, SEL1 subfamily                                          | 2.03 |
| ZMO1555 | No hit                                                                   | 2.02 |
| ZMO1215 | No hit                                                                   | 2.02 |
| ZMO1784 | hypothetical transmembrane protein                                       | 2.01 |
| ZMO1238 | No hit                                                                   | 2.01 |
| ZMO0200 | anthranilate phosphoribosyltransferase                                   | 2.01 |
| ZMO0186 | cysteinyl-tRNA synthetase                                                | 2.00 |
| ZMO0081 | chemotaxis response regulator protein-glutamate methyltransferase, CheB  | 2.00 |
| ZMO1328 | rRNA methylases                                                          | 2.00 |
| ZMO1401 | nuclease, probable                                                       | 2.00 |
| ZMO0802 | No hit                                                                   | 2.00 |
| ZMO1251 | No hit                                                                   | 2.00 |
