# Supplementary material for: The genome sequence of the ethanologenic bacterium Zymomonas mobilis ZM4
Source: PubMed Central journal article supplement — Nat Biotechnol. 2005 Jan 1;23(1):63–8. doi: 10.1038/nbt1045 (PMC6870993; doi:10.1038/nbt1045), 2005-01-01
Supplement: 41587_2005_BFnbt1045_MOESM4_ESM.pdf [file 41587_2005_BFnbt1045_MOESM4_ESM.pdf]

| ORF     | Name                                                        | Fold  |
|---------|-------------------------------------------------------------|-------|
| ZMO0066 | No hit                                                      | 21.63 |
| ZMO1161 | No hit                                                      | 19.33 |
| ZMO0943 | No hit                                                      | 18.68 |
| ZMO0137 | FOG: TPR repeat, SEL1 subfamily                             | 16.15 |
| ZMO0196 | No hit                                                      | 15.49 |
| ZMO0164 | periplasmic protein TonB, links inner and outer membranes   | 14.64 |
| ZMO0816 | No hit                                                      | 11.55 |
| ZMO0393 | No hit                                                      | 11.24 |
| ZMO0034 | No hit                                                      | 10.57 |
| ZMO1822 | ferrisiderophore receptor protein, TonB dependent           | 8.70  |
| ZMO1765 | No hit                                                      | 8.50  |
| ZMO0931 | No hit                                                      | 8.12  |
| ZMO0932 | secretion activator protein                                 | 8.01  |
| ZMO0383 | No hit                                                      | 7.84  |
| ZMO0381 | No hit                                                      | 7.79  |
| ZMO1787 | No hit                                                      | 7.76  |
| ZMO1239 | No hit                                                      | 7.74  |
| ZMO0264 | No hit                                                      | 7.52  |
| ZMO1106 | No hit                                                      | 7.17  |
| ZMO0929 | No hit                                                      | 6.55  |
| ZMO0398 | RTX toxins and related Ca <sup>2+</sup> -binding proteins   | 6.33  |
| ZMO0628 | No hit                                                      | 6.30  |
| ZMO0268 | No hit                                                      | 5.91  |
| ZMO0397 | No hit                                                      | 5.81  |
| ZMO0466 | No hit                                                      | 5.80  |
| ZMO0375 | extracellular sucrose (beta-fructofuranosidase) (invertase) | 5.75  |
| ZMO1806 | acetyltransferase, putative                                 | 5.51  |
| ZMO0597 | hypothetical protein                                        | 5.33  |
| ZMO1184 | electrotransfer ubiquinone oxidoreductase, putative         | 5.16  |
| ZMO1910 | ribosomal protein L25 (general stress protein Ctc)          | 5.15  |
| ZMO0934 | No hit                                                      | 5.01  |
| ZMO0670 | No hit                                                      | 4.85  |
| ZMO1391 | sphingosine kinase                                          | 4.82  |
| ZMO0394 | No hit                                                      | 4.48  |
| ZMO0702 | No hit                                                      | 4.40  |
| ZMO1780 | hypothetical protein                                        | 4.40  |
| ZMO1915 | biotin synthesis protein, putative                          | 4.21  |
| ZMO0518 | ribosomal protein L4                                        | 4.17  |
| ZMO1558 | No hit                                                      | 4.00  |
| ZMO0885 | hypothetical protein                                        | 4.00  |
| ZMO0461 | No hit                                                      | 3.93  |
| ZMO1850 | hypothetical protein                                        | 3.83  |
| ZMO1474 | No hit                                                      | 3.70  |
| ZMO0380 | putative portal protein [ <i>P. aeruginosa</i> phage PaP3]  | 3.63  |
| ZMO0550 | ribosomal protein S15P, SSU                                 | 3.61  |
| ZMO1911 | peptidyl-tRNA hydrolase                                     | 3.56  |
| ZMO0333 | No hit                                                      | 3.51  |
| ZMO1621 | No hit                                                      | 3.51  |
| ZMO1427 | No hit                                                      | 3.51  |
| ZMO0388 | No hit                                                      | 3.46  |
| ZMO1997 | membrane protein, predicted                                 | 3.43  |

|         |                                                                                |      |
|---------|--------------------------------------------------------------------------------|------|
| ZM01472 | No hit                                                                         | 3.33 |
| ZM00541 | DNA-directed RNA polymerase, alpha subunit/40 kD subunit                       | 3.31 |
| ZM01872 | hypothetical protein                                                           | 3.26 |
| ZM00477 | No hit                                                                         | 3.25 |
| ZM00690 | No hit                                                                         | 3.23 |
| ZM01279 | acyl carrier protein                                                           | 3.09 |
| ZM00378 | conserved hypothetical protein, phage-related                                  | 3.06 |
| ZM00376 | ATP-dependent Lon protease, bacterial type                                     | 3.04 |
| ZM01753 | ferredoxin-NADP reductase                                                      | 3.01 |
| ZM00523 | ribosomal protein L16/L10E                                                     | 3.00 |
| ZM00071 | No hit                                                                         | 2.95 |
| ZM00365 | No hit                                                                         | 2.91 |
| ZM00528 | ribosomal protein L5                                                           | 2.89 |
| ZM00534 | ribosomal protein L30/L7E                                                      | 2.88 |
| ZM00849 | hypothetical protein                                                           | 2.87 |
| ZM01185 | phage SPO1 DNA polymerase-related protein                                      | 2.85 |
| ZM00373 | No hit                                                                         | 2.85 |
| ZM01732 | alkyl hydroperoxide reductase                                                  | 2.81 |
| ZM00525 | ribosomal protein S17                                                          | 2.79 |
| ZM00387 | major head protein [P. aeruginosa phage PaP3]                                  | 2.74 |
| ZM00529 | ribosomal protein S14                                                          | 2.72 |
| ZM00526 | ribosomal protein L14, 50S                                                     | 2.71 |
| ZM01595 | No hit                                                                         | 2.70 |
| ZM01214 | DNA and RNA helicases superfamily II                                           | 2.70 |
| ZM01352 | integral membrane protein                                                      | 2.68 |
| ZM01585 | No hit                                                                         | 2.67 |
| ZM00418 | conserved hypothetical protein                                                 | 2.66 |
| ZM01079 | ribosomal protein L19                                                          | 2.64 |
| ZM00395 | hypothetical protein                                                           | 2.59 |
| ZM00724 | transcription antiterminator, NusG                                             | 2.58 |
| ZM01512 | ABC-type transport system involved in Fe-S cluster assembly, permease and ATPa | 2.57 |
| ZM00211 | ribosomal protein L21                                                          | 2.55 |
| ZM01361 | No hit                                                                         | 2.54 |
| ZM00445 | hypothetical protein                                                           | 2.49 |
| ZM00555 | transcription termination involved nucleic-acid-binding protein, predicted     | 2.49 |
| ZM01875 | hypothetical protein                                                           | 2.49 |
| ZM00648 | flagellar biosynthetic protein FliQ                                            | 2.46 |
| ZM01244 | No hit                                                                         | 2.45 |
| ZM00448 | cell wall hydrolyses involved in spore germination                             | 2.43 |
| ZM01752 | No hit                                                                         | 2.42 |
| ZM00293 | metabolite (sugar) transport protein                                           | 2.40 |
| ZM01081 | No hit                                                                         | 2.39 |
| ZM01511 | hypothetical protein                                                           | 2.39 |
| ZM00530 | ribosomal protein S8                                                           | 2.38 |
| ZM00947 | hypothetical protein                                                           | 2.36 |
| ZM00649 | flagellar biosynthesis pathway, component FliR                                 | 2.35 |
| ZM00408 | ornithine/acetylornithine aminotransferase                                     | 2.34 |
| ZM00053 | beta-ketoadipate enol-lactone hydrolase, putative                              | 2.34 |
| ZM01077 | 16S rRNA processing RimM protein                                               | 2.33 |
| ZM01225 | ribosomal protein S6                                                           | 2.32 |
| ZM01031 | No hit                                                                         | 2.32 |
| ZM01086 | endoglucanase Y                                                                | 2.32 |

|         |                                                                           |      |
|---------|---------------------------------------------------------------------------|------|
| ZM01227 | ribosomal protein L9                                                      | 2.31 |
| ZM00118 | No hit                                                                    | 2.31 |
| ZM01516 | ribosomal protein L35                                                     | 2.31 |
| ZM00540 | ribosomal protein S11                                                     | 2.30 |
| ZM01444 | glycyl-tRNA synthetase, beta subunit                                      | 2.29 |
| ZM00594 | shikimate kinase                                                          | 2.28 |
| ZM00890 | lysyl-tRNA synthetase (class I)                                           | 2.27 |
| ZM00723 | transcription antiterminator, NusG                                        | 2.25 |
| ZM00599 | acetyl-CoA carboxylase alpha subunit                                      | 2.25 |
| ZM01326 | PTS system, mannose/fructose-specific component IIA                       | 2.25 |
| ZM01798 | ribosomal protein S1                                                      | 2.23 |
| ZM01226 | ribosomal protein S18                                                     | 2.20 |
| ZM00377 | 3-methyladenine DNA glycosylase/8-oxoguanine DNA glycosylase              | 2.19 |
| ZM00593 | 3-dehydroquinase synthetase                                               | 2.18 |
| ZM00396 | No hit                                                                    | 2.18 |
| ZM01506 | No hit                                                                    | 2.18 |
| ZM00894 | conserved hypothetical protein                                            | 2.18 |
| ZM01809 | NADH:ubiquinone oxidoreductase, subunit RnfE                              | 2.18 |
| ZM00527 | ribosomal protein L24                                                     | 2.17 |
| ZM01412 | transcriptional regulator, predicted                                      | 2.16 |
| ZM01515 | ribosomal protein L20                                                     | 2.16 |
| ZM00537 | preprotein translocase, transmembrane, probable                           | 2.16 |
| ZM00522 | ribosomal protein S3                                                      | 2.14 |
| ZM00977 | No hit                                                                    | 2.12 |
| ZM00058 | No hit                                                                    | 2.12 |
| ZM01886 | transport protein, putative                                               | 2.11 |
| ZM00590 | uncharacterized membrane protein, required for colicin V                  | 2.11 |
| ZM01446 | glycyl-tRNA synthetase, alpha subunit                                     | 2.11 |
| ZM00454 | formate-tetrahydrofolate ligase                                           | 2.10 |
| ZM01871 | quinolinate synthase                                                      | 2.10 |
| ZM01204 | No hit                                                                    | 2.09 |
| ZM01362 | No hit                                                                    | 2.08 |
| ZM00893 | esterase                                                                  | 2.08 |
| ZM00400 | No hit                                                                    | 2.07 |
| ZM00352 | conserved hypothetical protein                                            | 2.07 |
| ZM01146 | (3R)-hydroxymyristoyl-[acyl carrier protein] dehydratase                  | 2.06 |
| ZM01739 | two-component signal transduction protein with a C-terminal ATPase domain | 2.05 |
| ZM01774 | No hit                                                                    | 2.05 |
| ZM01858 | No hit                                                                    | 2.05 |
| ZM01082 | No hit                                                                    | 2.04 |
| ZM01048 | hypothetical protein                                                      | 2.04 |
| ZM01454 | No hit                                                                    | 2.03 |
| ZM01625 | ribonuclease P protein component                                          | 2.03 |
| ZM01757 | gluconate kinase                                                          | 2.03 |
| ZM00644 | flagellar motor switch/type III secretory pathway protein, FliN           | 2.02 |
| ZM00642 | hypothetical protein                                                      | 2.02 |
| ZM01208 | No hit                                                                    | 2.02 |
| ZM00557 | conserved hypothetical protein                                            | 2.01 |
| ZM00516 | GTPases - translation elongation factors                                  | 2.01 |
| ZM00176 | transketolase                                                             | 2.00 |
